# Supplementary material for: Nickel-catalysed enantioselective reaction of secondary phosphine oxides and activated vinylcyclopropanes
Source: Royal Society of Chemistry journal article supplement (doi:10.1039/d3ob00389b), 2023-01-01
Supplement: d3ob00389b1.pdf [file d3ob00389b1.pdf]

## Supporting Information for

# Nickel-Catalysed Enantioselective Reaction of Secondary Phosphine Oxides and Activated Vinylcyclopropanes

Zhuo Huang, Xu-Teng Liu, Ranran Cui, Qing-Wei Zhang\*

Department of Chemistry, University of Science and Technology of China, Hefei  
230026, China

E-mail: qingweiz@ustc.edu.cn

## INDEX

|                                                                         |           |
|-------------------------------------------------------------------------|-----------|
| <b>1. General Information .....</b>                                     | <b>3</b>  |
| <b>2. Optimization of reaction conditions.....</b>                      | <b>4</b>  |
| <b>3. General procedure for the synthesis of racemic products. ....</b> | <b>5</b>  |
| <b>4. General procedure for the synthesis of chiral products.....</b>   | <b>5</b>  |
| <b>5. Synthetic applications. ....</b>                                  | <b>6</b>  |
| <b>5.1 3 mmol-scale synthesis. ....</b>                                 | <b>6</b>  |
| <b>5.2 Decarboxylation.....</b>                                         | <b>6</b>  |
| <b>5.3 Reduction to P-stereogenic phosphine (III).....</b>              | <b>7</b>  |
| <b>6. Spectroscopic data of products.....</b>                           | <b>8</b>  |
| <b>7. Supplementary references .....</b>                                | <b>16</b> |
| <b>8. Copies of NMR Spectroscopic data.....</b>                         | <b>17</b> |
| <b>9. HPLC Spectra data .....</b>                                       | <b>56</b> |

## 1. General Information

Reactions were performed in a glovebox filled with N<sub>2</sub> using dry and deoxygenated solvents. Toluene were distilled over sodium and deoxygenated with N<sub>2</sub> and other solvents were used directly from commercial sources. All reactions under standard conditions were monitored by thin-layer chromatography (TLC) on gel F254 plates. The silica gel (200-300 or 300-400 meshes) was used for column chromatography. <sup>1</sup>H, <sup>13</sup>C, <sup>19</sup>F and <sup>31</sup>P NMR spectra were recorded in CDCl<sub>3</sub>, CD<sub>3</sub>COCD<sub>3</sub> or CD<sub>2</sub>Cl<sub>2</sub> solution on Bruker Aescend TM 500 MHz instruments and spectral data were reported in ppm. The residual solvent peak was used as an internal reference: proton (CDCl<sub>3</sub> δ 7.26) and carbon (CDCl<sub>3</sub> δ 77.0), proton (CD<sub>3</sub>COCD<sub>3</sub> δ 2.05) and carbon (CD<sub>3</sub>COCD<sub>3</sub> δ 206.26), proton (CD<sub>2</sub>Cl<sub>2</sub> δ 5.32) and carbon (CD<sub>2</sub>Cl<sub>2</sub> δ 53.26). High-resolution mass spectral analysis (HRMS) data were measured by means of the ESI technique. Enantiomer excess was determined by HPLC analysis employing Darcel Chiracel columns (AD-H, OD-H, IF and IH) and <sup>n</sup>hexane/<sup>m</sup>PrOH as eluents. Optical rotations were measured by Perkin-Elmer-343 polarimeter. Vinylcyclopropanes were prepared according to references 1 and 2, phosphine oxides were prepared according to references 3 and 4.

## 2. Optimization of reaction conditions.

Table S1. Optimization of reaction conditions<sup>a</sup>.

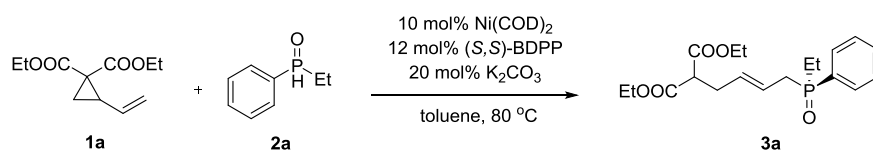

| Entry           | Base                            | Ligand    | Solvent     | Yield(%) <sup>b</sup> | Ee(%) |
|-----------------|---------------------------------|-----------|-------------|-----------------------|-------|
| 1               | K <sub>2</sub> CO <sub>3</sub>  | <b>L1</b> | Toluene     | 67                    | 81    |
| 2               | K <sub>2</sub> CO <sub>3</sub>  | <b>L2</b> | Toluene     | No reaction           | -     |
| 3               | K <sub>2</sub> CO <sub>3</sub>  | <b>L3</b> | Toluene     | 81                    | 0     |
| 4               | K <sub>2</sub> CO <sub>3</sub>  | <b>L4</b> | Toluene     | 86                    | 0     |
| 5               | K <sub>2</sub> CO <sub>3</sub>  | <b>L5</b> | Toluene     | Trace                 | 4     |
| 6               | K <sub>2</sub> CO <sub>3</sub>  | <b>L6</b> | Toluene     | 79                    | 0     |
| 7               | K <sub>2</sub> CO <sub>3</sub>  | <b>L1</b> | DCE         | 24                    | 76    |
| 8               | K <sub>2</sub> CO <sub>3</sub>  | <b>L1</b> | Mesitylene  | 68                    | 65    |
| 9               | K <sub>2</sub> CO <sub>3</sub>  | <b>L1</b> | MeCN        | 78                    | 68    |
| 10              | K <sub>2</sub> CO <sub>3</sub>  | <b>L1</b> | 1,4-Dioxane | 80                    | 63    |
| 11              | K <sub>2</sub> CO <sub>3</sub>  | <b>L1</b> | THF         | 57                    | 81    |
| 12 <sup>c</sup> | K <sub>2</sub> CO <sub>3</sub>  | <b>L1</b> | Toluene     | 75                    | 69    |
| 13 <sup>d</sup> | K <sub>2</sub> CO <sub>3</sub>  | <b>L1</b> | Toluene     | 84(70)                | 90    |
| 14 <sup>d</sup> | KOAc                            | <b>L1</b> | Toluene     | 86                    | 89    |
| 15 <sup>d</sup> | NaOAc                           | <b>L1</b> | Toluene     | 79                    | 89    |
| 16 <sup>d</sup> | LiOAc                           | <b>L1</b> | Toluene     | 79                    | 90    |
| 17 <sup>d</sup> | Na <sub>2</sub> CO <sub>3</sub> | <b>L1</b> | Toluene     | 85                    | 89    |
| 18 <sup>d</sup> | CS <sub>2</sub> CO <sub>3</sub> | <b>L1</b> | Toluene     | 81                    | 89    |

<sup>a</sup>Reaction conditions: **1a** (0.05 mmol, 1.0 equiv.), **2a** (0.05 mmol, 1.0 equiv.), Ni(COD)<sub>2</sub> (10 mol%), ligand (12 mol%), K<sub>2</sub>CO<sub>3</sub> (20 mol%), solvent (0.5 mL) at 80 °C. Ee value determined by chiral HPLC. <sup>b</sup>Determined by <sup>31</sup>P NMR spectra using trimethyl phosphate as internal standard, in brackets is the separation yield. <sup>c</sup>Ni(COD)<sub>2</sub> (5 mol%), ligand (6 mol%). <sup>d</sup>**2a** (0.1 mmol, 2.0 equiv.) at room temperature.

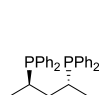

**L1**

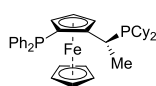

**L2**

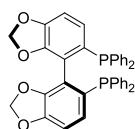

**L3**

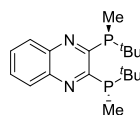

**L4**

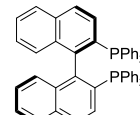

**L5**

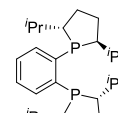

**L6**



### 3. General procedure for the synthesis of racemic products.

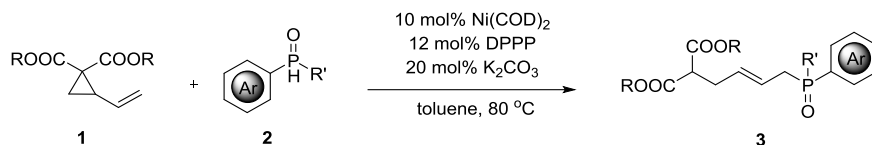

To a 4 mL vial were added Ni(COD)<sub>2</sub> (10 mol%, 1.4 mg), DPPP (12 mol%, 2.50 mg), and toluene (0.5 mL) in a N<sub>2</sub> flushed glove box. Then the mixture was stirred for 10 minutes followed by the addition of K<sub>2</sub>CO<sub>3</sub> (20 mol%, 1.4 mg), vinylcyclopropanes **1** (1.2 equiv, 0.06 mmol) and SPOs **2** (1.0 equiv, 0.05 mmol). The vial was capped, removed from the glove box, and the system was stirred at 80 °C until disappearance of **2** by TLC. The reaction mixture was cooled to room temperature and subjected to silica gel column chromatography directly for purification.

### 4. General procedure for the synthesis of chiral products.

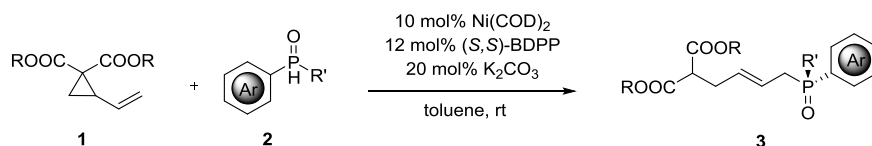

To a 4 mL vial were added Ni(COD)<sub>2</sub> (10 mol%, 2.8 mg), (*S,S*)-BDPP (12 mol%, 5.2 mg), and toluene (1.0 mL) in a N<sub>2</sub> flushed glove box. Then the mixture was stirred for 10 minutes followed by the addition of K<sub>2</sub>CO<sub>3</sub> (20 mol%, 2.8 mg), vinylcyclopropanes **1** (1.0 equiv, 0.1 mmol) and SPOs **2** (2.0 equiv, 0.2 mmol). The vial was capped, removed from the glove box, and the system was stirred at 10 °C (**2b**), 25 °C (**2a**, **2c-2d**, **2h-2j**, **2l-2w**), 60 °C (**2e**, **2g**, **2k**) or 80 °C (**2f**) until disappearance of **2** by TLC. The reaction mixture was cooled to room temperature, S<sub>8</sub> (2.5 equiv, 8.0 mg); Et<sub>2</sub>NH (2.5 equiv, 18.2 mg) (**2a-2j**, **2l-2n**, **2p-2w**) or 30% H<sub>2</sub>O<sub>2</sub> aqueous solution (20 μL) (**2k**, **2o**) were added to the mixture and stirred for 1 h to remove the remaining SPOs. The reaction mixture was then subjected to silica gel column chromatography directly for purification.

## 5. Synthetic applications.

### 5.1 3 mmol-scale synthesis.

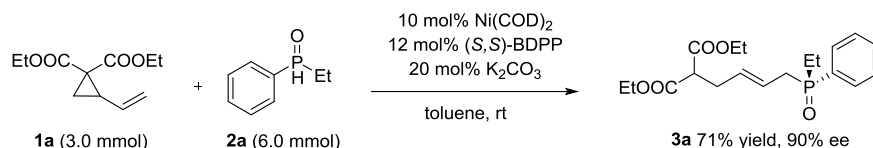

To a 100 mL Schlenk reaction bottle were added Ni(COD)<sub>2</sub> (10 mol%, 82.5 mg), ligand (*S,S*)-BDPP (12 mol%, 158.5 mg), and toluene (30 mL) in a N<sub>2</sub> flushed glove box. Then the mixture was stirred for 30 minutes followed by the addition of K<sub>2</sub>CO<sub>3</sub> (20 mol%, 82.8 mg), vinylcyclopropanes **1** (1.0 equiv, 3.0 mmol) and SPOs **2** (2.0 equiv, 6.0 mmol). The 100 mL Schlenk reaction bottle was capped, removed from the glove box, and the system was stirred at 25 °C until disappearance of **2** by TLC (9 days). The reaction mixture was cooled to room temperature, S<sub>8</sub> (2.5 equiv, 0.24 g) and Et<sub>2</sub>NH (2.5 equiv, 0.55 g) were added to the mixture and stirred 2 h to remove the remaining SPO. Then, the reaction mixture was concentrated *in vacuo*. Purification by silica gel column chromatography with 95:5 EtOAc/MeOH afford the desired product **3a** in 71% yield (0.78 g) with 90% ee.

### 5.2 Decarboxylation.

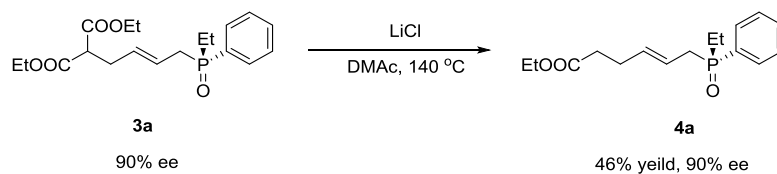

According to reference 5, a 4 mL vial was charged with tertiary phosphine oxide **3a** (0.1 mmol), LiCl (2.0 equiv, 8.5 mg) and DMAc (0.5 mL). The solution was heated at 140 °C for 6 h. The reaction mixture was cooled to room temperature and diluted with EtOAc (5 mL) and water (5 mL). The organic phase was separated and washed with additional water (5 mL x 2) and the organic layer was dried over anhydrous MgSO<sub>4</sub>, filtered and concentrated *in vacuo*. Purification by silica gel column chromatography with 95:5 EtOAc/MeOH afford the desired product **3a** in 45% yield (13.3 mg) with 90% ee.

### 5.3 Reduction to P-stereogenic phosphine (III).

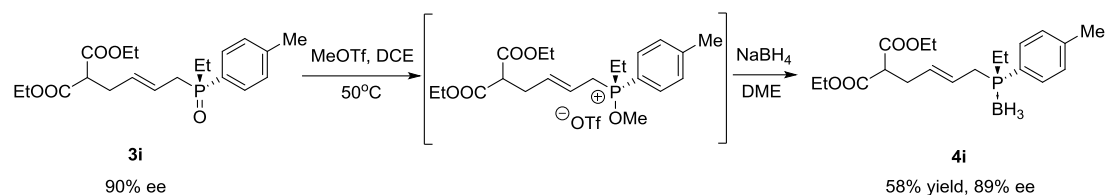

According to reference 6, to a stirred solution of MeOTf (0.12 mmol) in DME (0.2 mL) in a 4 mL vial, tertiary phosphine oxide **3i** (0.1 mmol) in DME (0.2 mL) was added dropwise at room temperature. The reaction was heated at 50 °C overnight. After cooling to room temperature, a dispersion of NaBH<sub>4</sub> (0.3 mmol) in diglyme (0.5 mL) was added dropwise to the vial. The reaction mixture was stirred for additional 3 hours at 50 °C before being cooled to room temperature and diluted with DCM (5 mL). Water was then added dropwise to quench the remaining NaBH<sub>4</sub>. The mixture was washed with water (5 mL x 3) and the organic layer was dried over anhydrous MgSO<sub>4</sub>, filtered and concentrated *in vacuo*. Purification by silica gel column chromatography with 90:10 PE/EtOAc afford the desired product **4i** in 58% yield (21.9 mg) with 89% ee.

## 6. Spectroscopic data of products.

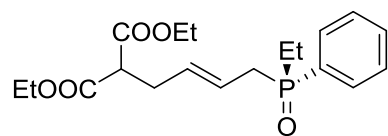

**(3a)** Colorless oil,  $R_f = 0.34$  (ethyl acetate/methanol = 5:1), 70% yield (25.6 mg),  $^1\text{H NMR}$  (500 MHz, Chloroform-*d*)  $\delta$  7.67 (ddd,  $J = 10.8, 8.2, 1.5$  Hz, 2H), 7.56 – 7.45 (m, 3H), 5.66 – 5.38 (m, 2H), 4.25 – 4.08 (m, 4H), 3.31 (t,  $J = 7.5$  Hz, 1H), 2.73 (dd,  $J = 14.8, 6.0$  Hz, 2H), 2.58 (ddt,  $J = 7.7, 6.1, 2.8$  Hz, 2H), 2.08 – 1.96 (m, 1H), 1.94 – 1.81 (m, 1H), 1.25 (t,  $J = 7.1$  Hz, 6H), 1.11 (dt,  $J = 17.1, 7.7$  Hz, 3H).  $^{13}\text{C NMR}$  (126 MHz, Chloroform-*d*)  $\delta$  168.74 (d,  $J = 2.6$  Hz), 131.67 (d,  $J = 2.7$  Hz), 131.60 (d,  $J = 11.4$  Hz), 131.53 (d,  $J = 92.8$  Hz), 130.54 (d,  $J = 8.6$  Hz), 128.56 (d,  $J = 11.3$  Hz), 122.31 (d,  $J = 8.6$  Hz), 61.44, 51.69 (d,  $J = 3.3$  Hz), 34.67 (d,  $J = 65.2$  Hz), 31.70 (d,  $J = 2.3$  Hz), 21.41 (d,  $J = 70.3$  Hz), 14.03, 5.28 (d,  $J = 5.2$  Hz).  $^{31}\text{P NMR}$  (202 MHz, Chloroform-*d*)  $\delta$  39.9. **HRMS** (ESI) calcd for  $\text{C}_{19}\text{H}_{27}\text{O}_5\text{PNa}^+$   $[\text{M}+\text{Na}]^+$  389.1488, Found 389.1490. The enantiomeric excess was determined by Daicel Chiralcel OD-H (90% ee), *n*-Hexanes/IPA = 80/20, 1 mL/min,  $\lambda = 210$  nm,  $t$  (major) = 8.25 min,  $t$  (minor) = 6.99 min.  $[\alpha]_{\text{D}}^{20} = -8.5$  ( $c = 0.2$ , acetone).

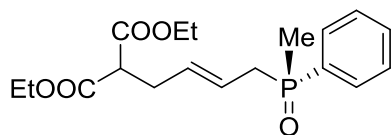

**(3b)** Colorless oil,  $R_f = 0.31$  (Ethyl acetate/methanol = 5:1), 79% yield (27.8 mg),  $^1\text{H NMR}$  (500 MHz, Chloroform-*d*)  $\delta$  7.71 – 7.63 (m, 2H), 7.50 (dtt,  $J = 14.7, 7.0, 4.3$  Hz, 3H), 5.51 (m, 2H), 4.17 (dtt,  $J = 10.8, 7.2, 3.8$  Hz, 4H), 3.32 (t,  $J = 7.4$  Hz, 1H), 2.77 – 2.64 (m, 2H), 2.59 (dq,  $J = 7.0, 3.8, 3.2$  Hz, 2H), 1.68 (d,  $J = 12.8$  Hz, 3H), 1.24 (t,  $J = 7.1$  Hz, 6H).  $^{13}\text{C NMR}$  (126 MHz, Chloroform-*d*)  $\delta$  168.72 (d,  $J = 2.6$  Hz), 133.26 (d,  $J = 96.1$  Hz), 131.77 (d,  $J = 10.1$  Hz), 131.72 – 131.71 (d,  $J = 1.3$  Hz), 130.10 (d,  $J = 9.0$  Hz), 128.58 (d,  $J = 11.5$  Hz), 122.43 (d,  $J = 8.8$  Hz), 61.44, 51.71 (d,  $J = 3.4$  Hz), 36.81 (d,  $J = 67.0$  Hz), 31.72 (d,  $J = 2.4$  Hz), 14.72 (d,  $J = 70.9$  Hz), 14.04.  $^{31}\text{P NMR}$  (202 MHz, Chloroform-*d*)  $\delta$  35.1. **HRMS** (ESI) calcd for  $\text{C}_{18}\text{H}_{26}\text{O}_5\text{P}^+$   $[\text{M}+\text{H}]^+$  353.1512, Found 353.1515. The enantiomeric excess was determined by Daicel Chiralcel OD-H (91% ee), *n*-Hexanes/IPA = 80/20, 1 mL/min,  $\lambda = 210$  nm,  $t$  (major) = 9.60 min,  $t$  (minor) = 8.70 min.  $[\alpha]_{\text{D}}^{20} = -3.9$  ( $c = 0.3$ , acetone).

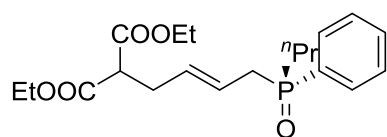

**(3c)** Colorless oil,  $R_f = 0.37$  (Ethyl acetate/methanol = 7:1), 81% yield (30.8 mg),  $^1\text{H NMR}$  (500 MHz, Chloroform-*d*)  $\delta$  7.73 – 7.61 (m, 2H), 7.49 (dtt,  $J = 14.3, 6.6, 4.0$  Hz, 3H), 5.62 – 5.37 (m, 2H), 4.26 – 4.04 (m, 4H), 3.30 (t,  $J = 7.4$  Hz, 1H), 2.71 (dd,  $J = 14.9, 6.1$  Hz, 2H), 2.57 (dq,  $J = 7.2, 3.3$  Hz, 2H), 2.05 – 1.90 (m, 1H), 1.84 (tdd,  $J = 14.7, 10.1, 5.0$  Hz, 1H), 1.75 – 1.57 (m, 1H), 1.56 – 1.41 (m, 1H), 1.24 (t,  $J = 7.1$  Hz, 6H), 0.98 (t,  $J = 7.3$  Hz, 3H).  $^{13}\text{C NMR}$  (126 MHz, Chloroform-*d*)  $\delta$  168.72 (d,  $J = 1.5$  Hz), 132.18 (d,  $J = 91.9$  Hz), 131.58, 131.53 (d,  $J = 9.1$  Hz), 130.48 (d,  $J = 8.7$  Hz), 128.51 (d,  $J = 11.3$  Hz), 122.42 (dd,  $J = 8.7, 2.7$  Hz), 61.41, 51.73 (d,  $J = 3.2$  Hz), 35.27 (d,  $J = 65.0$  Hz), 31.72 (d,  $J = 2.3$  Hz), 30.64 (d,  $J = 69.2$  Hz), 15.60 (d,  $J = 14.9$  Hz), 15.00 (d,  $J = 4.1$  Hz), 14.04.  $^{31}\text{P NMR}$  (202 MHz, Chloroform-*d*)  $\delta$  37.6. **HRMS** (ESI) calcd for  $\text{C}_{20}\text{H}_{30}\text{O}_5\text{P}^+$   $[\text{M}+\text{H}]^+$  381.1825, Found 381.1837. The enantiomeric excess was determined by Daicel Chiralcel OD-H (87% ee), *n*-Hexanes/IPA = 90/10, 1 mL/min,  $\lambda = 210$  nm,  $t$  (major) = 17.28 min,  $t$  (minor) = 13.48 min.  $[\alpha]_{\text{D}}^{20} = -5.9$  ( $c = 0.3$ , acetone).

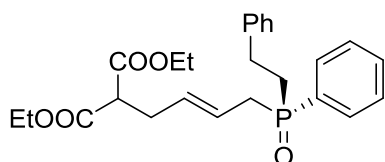

**(3d)** Colorless oil,  $R_f = 0.56$  (Ethyl acetate/methanol = 7:1), 58% yield (25.7 mg),  $^1\text{H NMR}$  (500 MHz, Methylene Chloride- $d_2$ )  $\delta$  7.69 (ddt,  $J = 9.6, 6.8, 1.5$  Hz, 2H), 7.58 – 7.47 (m, 4H), 7.26 (dd,  $J = 8.2, 7.0$  Hz, 2H), 7.20 – 7.15 (m, 3H), 5.57 – 5.39 (m, 2H), 4.11 (ddtd,  $J = 17.9, 10.8, 7.0, 3.4$  Hz, 5H), 3.30 (t,  $J = 7.5$  Hz, 1H), 2.93 (dddd,  $J = 14.2, 12.6, 7.9, 5.1$  Hz, 1H), 2.80 – 2.62 (m, 4H), 2.55 (dp,  $J = 7.9, 2.3$  Hz, 2H), 2.31 (dtd,  $J = 14.8, 12.3, 5.0$  Hz, 1H), 2.15 (dddd,  $J = 14.8, 12.1, 8.8, 4.8$  Hz, 1H), 1.21 (td,  $J = 7.1, 3.5$  Hz, 6H).  $^{13}\text{C NMR}$  (126 MHz, Methylene Chloride- $d_2$ )  $\delta$  169.04, 141.84 (d,  $J = 14.3$  Hz), 132.83 (d,  $J = 92.5$  Hz), 130.93 (d,  $J = 8.7$  Hz), 128.96 (d,  $J = 11.1$  Hz), 128.88, 128.48, 126.59, 122.80 (d,  $J = 8.7$  Hz), 61.76, 52.11 (d,  $J = 3.2$  Hz), 35.76 (d,  $J = 65.1$  Hz), 32.13 (d,  $J = 2.3$  Hz), 30.98 (d,  $J = 67.1$  Hz), 27.72 (d,  $J = 3.4$  Hz), 14.25.  $^{31}\text{P NMR}$  (202 MHz, Methylene Chloride- $d_2$ )  $\delta$  35.8. **HRMS** (ESI) calcd for  $\text{C}_{25}\text{H}_{32}\text{O}_5\text{P}^+$   $[\text{M}+\text{H}]^+$  443.1982, Found 443.1993. The enantiomeric excess was determined by Daicel Chiralcel OD-H (78% ee), *n*-Hexanes/IPA = 80/20, 1 mL/min,  $\lambda = 210$  nm,  $t$  (major) = 13.43 min,  $t$  (minor) = 10.41 min.  $[\alpha]_{\text{D}}^{20} = +4.1$  ( $c = 0.2$ , acetone).

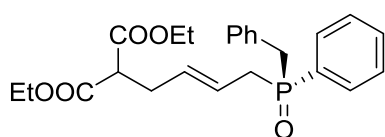

**(3e)** White solid,  $R_f = 0.52$  (Ethyl acetate/methanol = 7:1), 65% yield (27.8 mg),  $^1\text{H NMR}$  (500 MHz, Acetone- $d_6$ )  $\delta$  7.73 (ddd,  $J = 10.8, 8.2, 1.4$  Hz, 2H), 7.56 – 7.50 (m, 1H), 7.49 – 7.44 (m, 2H), 7.23 – 7.11 (m, 5H), 5.60 – 5.46 (m, 2H), 4.20 – 4.04 (m, 4H), 3.47 (t,  $J = 14.7$  Hz, 1H), 3.42 – 3.32 (m, 2H), 2.83 – 2.74 (m, 2H), 2.54 – 2.46 (m, 2H), 1.20 (td,  $J = 7.1, 3.1$  Hz, 6H).  $^{13}\text{C NMR}$  (126 MHz, Acetone- $d_6$ )  $\delta$  169.43, 134.01 (d,  $J = 92.5$  Hz), 133.83 (d,  $J = 7.8$  Hz), 132.31 (d,  $J = 2.7$  Hz), 132.29 (d,  $J = 11.5$  Hz), 132.02 (d,  $J = 8.6$  Hz), 131.08 (d,  $J = 5.1$  Hz), 129.19 (d,  $J = 11.1$  Hz), 129.04 (d,  $J = 2.5$  Hz), 127.28 (d,  $J = 2.8$  Hz), 123.82 (d,  $J = 9.0$  Hz), 61.88, 52.58 (d,  $J = 3.2$  Hz), 37.74 (d,  $J = 63.3$  Hz), 35.18 (d,  $J = 65.7$  Hz), 32.71 (d,  $J = 2.2$  Hz), 14.53.  $^{31}\text{P NMR}$  (202 MHz, Acetone- $d_6$ )  $\delta$  32.4. **HRMS** (ESI) calcd for  $\text{C}_{24}\text{H}_{30}\text{O}_5\text{P}^+$   $[\text{M}+\text{H}]^+$  429.1825, Found 429.1828. The enantiomeric excess was determined by Daicel Chiralcel OD-H (66% ee), *n*-Hexanes/IPA = 90/10, 1 mL/min,  $\lambda = 210$  nm,  $t$  (major) = 35.80 min,  $t$  (minor) = 26.26 min.  $[\alpha]_{\text{D}}^{20} = -1.7$  ( $c = 0.3$ , acetone).

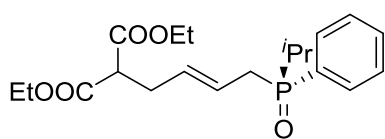

**(3f)** Colorless oil,  $R_f = 0.34$  (Ethyl acetate/methanol = 7:1), 48% yield (18.3 mg),  $^1\text{H NMR}$  (500 MHz, Chloroform- $d$ )  $\delta$  7.75 – 7.61 (m, 2H), 7.49 (dtd,  $J = 14.4, 7.1, 2.0$  Hz, 3H), 5.50 (m, 2H), 4.26 – 4.06 (m, 4H), 3.28 (t,  $J = 7.4$  Hz, 1H), 2.89 – 2.68 (m, 2H), 2.55 (ddd,  $J = 8.3, 5.7, 2.8$  Hz, 2H), 2.18 – 2.01 (m,  $J = 7.4, 6.9$  Hz, 1H), 1.34 – 1.18 (m, 10H), 1.03 (dd,  $J = 16.3, 7.2$  Hz, 3H).  $^{13}\text{C NMR}$  (126 MHz, Chloroform- $d$ )  $\delta$  168.72 (d,  $J = 2.3$  Hz), 131.50, 131.46 (d,  $J = 14.0$  Hz), 131.00 (d,  $J = 8.1$  Hz), 130.83 (d,  $J = 90.0$  Hz), 128.38 (d,  $J = 10.8$  Hz), 122.36 (d,  $J = 8.4$  Hz), 61.39, 51.73 (d,  $J = 3.0$  Hz), 32.25 (d,  $J = 63.1$  Hz), 31.72 (d,  $J = 2.1$  Hz), 27.31 (d,  $J = 69.6$  Hz), 15.54 (d,  $J = 2.5$  Hz), 14.90 (d,  $J = 3.0$  Hz), 14.03.  $^{31}\text{P NMR}$  (202 MHz, Chloroform- $d$ )  $\delta$  43.1. **HRMS** (ESI) calcd for  $\text{C}_{20}\text{H}_{30}\text{O}_5\text{P}^+$   $[\text{M}+\text{H}]^+$  381.1825, Found 381.1826. The enantiomeric excess was determined by Daicel Chiralcel OD-H (62% ee), *n*-Hexanes/IPA = 80/20, 1 mL/min,  $\lambda = 210$  nm,  $t$  (major) = 7.72 min,  $t$  (minor) = 6.30 min.  $[\alpha]_{\text{D}}^{20} = -0.2$  ( $c = 0.5$ , acetone).

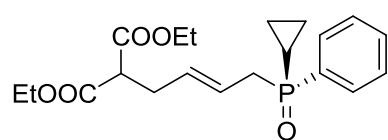

**(3g)** Colorless oil,  $R_f = 0.36$  (Ethyl acetate/methanol = 7:1), 66% yield (25.0 mg),  $^1\text{H NMR}$  (500 MHz, Chloroform-*d*)  $\delta$  7.92 – 7.65 (m, 2H), 7.64 – 7.40 (m, 3H), 5.67 – 5.35 (m, 2H), 4.16 (ttd,  $J = 10.9, 7.1, 3.7$  Hz, 4H), 3.30 (t,  $J = 7.5$  Hz, 1H), 2.92 – 2.67 (m, 2H), 2.62 – 2.49 (m, 2H), 1.24 (td,  $J = 7.1, 1.3$  Hz, 6H), 1.11 – 0.98 (m, 2H), 0.96 – 0.75 (m, 3H).  $^{13}\text{C NMR}$  (126 MHz, Chloroform-*d*)  $\delta$  168.74 (d,  $J = 2.4$  Hz), 133.02 (d,  $J = 98.4$  Hz), 131.56 (d,  $J = 2.7$  Hz), 131.36 (d,  $J = 11.7$  Hz), 130.40 (d,  $J = 8.7$  Hz), 128.44 (d,  $J = 11.3$  Hz), 122.56 (d,  $J = 8.5$  Hz), 61.41, 51.76 (d,  $J = 3.4$  Hz), 35.72 (d,  $J = 69.0$  Hz), 31.75 (d,  $J = 2.2$  Hz), 14.04, 5.82 (d,  $J = 101.6$  Hz), 2.40 (dd,  $J = 73.3, 4.1$  Hz).  $^{31}\text{P NMR}$  (202 MHz, Chloroform-*d*)  $\delta$  36.1. **HRMS** (ESI) calcd for  $\text{C}_{20}\text{H}_{28}\text{O}_5\text{P}^+$   $[\text{M}+\text{H}]^+$  379.1669, Found 379.1675. The enantiomeric excess was determined by Daicel Chiralcel OD-H (46% ee), *n*-Hexanes/IPA = 90/10, 1 mL/min,  $\lambda = 210$  nm,  $t$  (major) = 17.88 min,  $t$  (minor) = 15.92 min.  $[\alpha]_{\text{D}}^{20} = -12.5$  ( $c = 0.2$ , acetone).

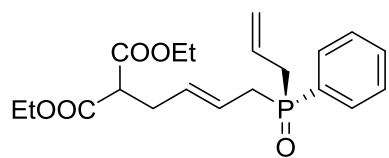

**(3h)** Colorless oil,  $R_f = 0.40$  (Ethyl acetate/methanol = 7:1), 67% yield (25.3 mg),  $^1\text{H NMR}$  (500 MHz, Chloroform-*d*)  $\delta$  7.79 – 7.61 (m, 2H), 7.63 – 7.41 (m, 3H), 5.76 (dddd,  $J = 17.5, 12.7, 8.8, 6.2$  Hz, 1H), 5.54 (dq,  $J = 5.9, 2.9$  Hz, 2H), 5.27 – 5.07 (m, 2H), 4.25 – 4.05 (m, 4H), 3.33 (t,  $J = 7.4$  Hz, 1H), 2.82 (m, 4H), 2.60 (dt,  $J = 8.3, 3.5$  Hz, 2H), 1.25 (t,  $J = 7.1$  Hz, 6H).  $^{13}\text{C NMR}$  (126 MHz, Chloroform-*d*)  $\delta$  168.72 (d,  $J = 2.4$  Hz), 131.97 (d,  $J = 11.8$  Hz), 131.78 (d,  $J = 2.8$  Hz), 131.60 (d,  $J = 93.8$  Hz), 130.65 (d,  $J = 8.5$  Hz), 128.50 (d,  $J = 11.4$  Hz), 127.26 (d,  $J = 8.9$  Hz), 122.07 (d,  $J = 8.8$  Hz), 120.76 (d,  $J = 11.5$  Hz), 61.44, 51.71 (d,  $J = 3.3$  Hz), 35.06 (d,  $J = 65.7$  Hz), 34.07 (d,  $J = 66.0$  Hz), 31.74 (d,  $J = 2.2$  Hz), 14.04.  $^{31}\text{P NMR}$  (202 MHz, Chloroform-*d*)  $\delta$  34.9. **HRMS** (ESI) calcd for  $\text{C}_{20}\text{H}_{28}\text{O}_5\text{P}^+$   $[\text{M}+\text{H}]^+$  379.1669, Found 379.1685. The enantiomeric excess was determined by Daicel Chiralcel OD-H (56% ee), *n*-Hexanes/IPA = 80/20, 1 mL/min,  $\lambda = 210$  nm,  $t$  (major) = 8.83 min,  $t$  (minor) = 7.57 min.  $[\alpha]_{\text{D}}^{20} = -5.1$  ( $c = 0.5$ , acetone).

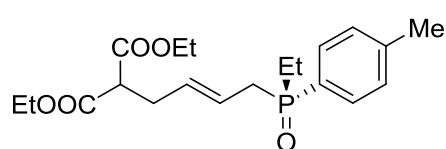

**(3i)** Colorless oil,  $R_f = 0.29$  (Ethyl acetate/methanol = 7:1), 76% (28.9 mg) yield,  $^1\text{H NMR}$  (500 MHz, Chloroform-*d*)  $\delta$  7.56 – 7.50 (m, 2H), 7.30 – 7.26 (m, 2H), 5.60 – 5.39 (m, 2H), 4.26 – 4.07 (m, 4H), 3.31 (t,  $J = 7.5$  Hz, 1H), 2.75 – 2.64 (m, 2H), 2.57 (dq,  $J = 8.0, 3.3, 2.4$  Hz, 2H), 2.39 (s, 3H), 1.96 (m, 1H), 1.84 (m, 1H), 1.23 (t,  $J = 7.2$  Hz, 6H), 1.08 (dt,  $J = 17.0, 7.7$  Hz, 3H).  $^{13}\text{C NMR}$  (126 MHz, Chloroform-*d*)  $\delta$  168.72 (d,  $J = 2.8$  Hz), 142.02 (d,  $J = 2.8$  Hz), 131.34 (d,  $J = 11.4$  Hz), 130.54 (d,  $J = 8.8$  Hz), 129.27 (d,  $J = 11.6$  Hz), 128.26 (d,  $J = 95.1$  Hz), 122.56 (d,  $J = 8.6$  Hz), 61.39, 51.70 (d,  $J = 3.2$  Hz), 34.84 (d,  $J = 65.2$  Hz), 31.71 (d,  $J = 2.2$  Hz), 21.50, 21.46 (d,  $J = 70.4$  Hz), 14.02, 5.29 (d,  $J = 5.0$  Hz).  $^{31}\text{P NMR}$  (202 MHz, Chloroform-*d*)  $\delta$  39.6. **HRMS** (ESI) calcd for  $\text{C}_{20}\text{H}_{30}\text{O}_5\text{P}^+$   $[\text{M}+\text{H}]^+$  381.1825, Found 381.1829. The enantiomeric excess was determined by Daicel Chiralcel IF (90% ee), *n*-Hexanes/IPA = 80/20, 1 mL/min,  $\lambda = 210$ ,  $t$  (major) = 27.12 min,  $t$  (minor) = 31.82 min.  $[\alpha]_{\text{D}}^{20} = -9.4$  ( $c = 1.2$ , acetone).

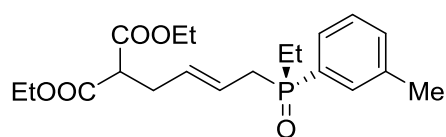

**(3j)** Colorless oil,  $R_f = 0.32$  (Ethyl acetate/methanol = 7:1), 67% yield (25.6 mg),  $^1\text{H NMR}$  (500 MHz, Chloroform-*d*)  $\delta$  7.53 (d,  $J = 11.3$  Hz, 1H), 7.45 – 7.29 (m, 3H), 5.59 – 5.44 (m, 2H), 4.26 – 4.08 (m, 4H), 3.31 (t,  $J = 7.5$  Hz, 1H), 2.70 (dd,  $J = 14.8, 6.0$  Hz, 2H), 2.61 – 2.54 (m, 2H), 2.39 (s, 3H), 2.09 – 1.96 (m, 1H), 1.86 (m, 1H), 1.24 (t,

$J = 7.1$  Hz, 6H), 1.10 (dt,  $J = 17.1$ , 7.7 Hz, 3H).  $^{13}\text{C NMR}$  (126 MHz, Chloroform- $d$ )  $\delta$  168.73 (d,  $J = 3.0$  Hz), 138.47 (d,  $J = 11.0$  Hz), 132.41 (d,  $J = 2.8$  Hz), 131.48 (d,  $J = 92.4$  Hz), 131.46 (d,  $J = 11.2$  Hz), 131.28 (d,  $J = 8.2$  Hz), 128.37 (d,  $J = 11.9$  Hz), 127.31 (d,  $J = 9.0$  Hz), 122.47 (d,  $J = 8.6$  Hz), 61.40, 51.74 (d,  $J = 3.1$  Hz), 34.77 (d,  $J = 65.0$  Hz), 31.72 (d,  $J = 2.2$  Hz), 21.45 (d,  $J = 70.3$  Hz), 21.35, 14.03, 5.31 (d,  $J = 5.1$  Hz).  $^{31}\text{P NMR}$  (202 MHz, Chloroform- $d$ )  $\delta$  39.6. **HRMS** (ESI) calcd for  $\text{C}_{20}\text{H}_{30}\text{O}_5\text{P}^+$   $[\text{M}+\text{H}]^+$  381.1825, Found 381.1829. The enantiomeric excess was determined by Daicel Chiralcel OD-H (87% ee),  $n$ -Hexanes/IPA = 80/20, 1 mL/min,  $\lambda = 210$  nm,  $t$  (major) = 7.44 min,  $t$  (minor) = 6.33 min.  $[\alpha]_{\text{D}}^{20} = -7.6$  ( $c = 0.6$ , acetone).

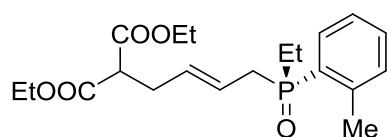

**(3k)** Colorless oil,  $R_f = 0.35$  (Ethyl acetate/methanol = 5:1), 39% yield (14.8 mg),  $^1\text{H NMR}$  (500 MHz, Chloroform- $d$ )  $\delta$  7.54 (ddd,  $J = 12.1$ , 7.6, 1.4 Hz, 1H), 7.39 (tt,  $J = 7.5$ , 1.5 Hz, 1H), 7.30 – 7.21 (m, 2H), 5.51 (m, 2H), 4.16 (ddp,  $J = 10.8$ , 7.2, 3.6 Hz, 5H), 3.29 (t,  $J = 7.5$  Hz, 1H), 2.87 – 2.72 (m, 2H), 2.63 (d,  $J = 1.3$  Hz, 3H), 2.56 (qd,  $J = 4.7$ , 1.9 Hz, 2H), 2.13 – 1.91 (m, 2H), 1.24 (td,  $J = 7.1$ , 1.2 Hz, 6H), 1.13 (dt,  $J = 17.1$ , 7.6 Hz, 3H).  $^{13}\text{C NMR}$  (126 MHz, Chloroform- $d$ )  $\delta$  168.75, 141.60 (d,  $J = 8.1$  Hz), 131.92 (d,  $J = 10.4$  Hz), 131.77 (d,  $J = 9.7$  Hz), 131.61 (d,  $J = 2.6$  Hz), 131.30 (d,  $J = 11.5$  Hz), 129.53 (d,  $J = 90.1$  Hz), 125.57 (d,  $J = 11.3$  Hz), 122.69 (d,  $J = 8.3$  Hz), 61.42, 51.78 (d,  $J = 3.0$  Hz), 34.51 (d,  $J = 64.5$  Hz), 31.73 (d,  $J = 2.2$  Hz), 21.61 (d,  $J = 70.2$  Hz), 21.55 (d,  $J = 3.1$  Hz), 14.05, 5.55 (d,  $J = 5.0$  Hz).  $^{31}\text{P NMR}$  (202 MHz, Chloroform- $d$ )  $\delta$  42.3. **HRMS** (ESI) calcd for  $\text{C}_{20}\text{H}_{30}\text{O}_5\text{P}^+$   $[\text{M}+\text{H}]^+$  381.1825, Found 381.1826. The enantiomeric excess was determined by Daicel Chiralcel IH (64% ee),  $n$ -Hexanes/IPA = 80/20, 1 mL/min,  $\lambda = 210$  nm,  $t$  (major) = 30.44 min,  $t$  (minor) = 27.22 min.  $[\alpha]_{\text{D}}^{20} = -9.3$  ( $c = 0.3$ , acetone).

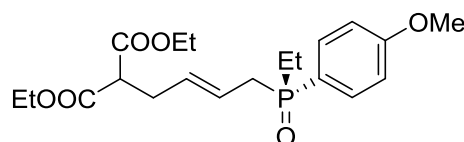

**(3l)** Colorless oil,  $R_f = 0.35$  (Ethyl acetate/methanol = 5:1), 72% yield (28.6 mg),  $^1\text{H NMR}$  (500 MHz, Chloroform- $d$ )  $\delta$  7.57 (dd,  $J = 10.4$ , 8.7 Hz, 2H), 6.97 (dd,  $J = 8.8$ , 2.2 Hz, 2H), 5.55 – 5.42 (m, 2H), 4.24 – 4.07 (m, 5H), 3.83 (s, 3H), 3.30 (t,  $J = 7.5$  Hz, 1H), 2.67 (dd,  $J = 14.9$ , 6.0 Hz, 2H), 2.56 (ddt,  $J = 7.4$ , 5.4, 2.6 Hz, 2H), 1.96 (ddq,  $J = 15.3$ , 12.9, 7.6 Hz, 1H), 1.83 (ddq,  $J = 15.2$ , 9.6, 7.7 Hz, 1H), 1.23 (t,  $J = 7.1$  Hz, 6H), 1.08 (dt,  $J = 17.1$ , 7.7 Hz, 3H).  $^{13}\text{C NMR}$  (126 MHz, Chloroform- $d$ )  $\delta$  168.71 (d,  $J = 3.2$  Hz), 162.23 (d,  $J = 2.8$  Hz), 132.32 (d,  $J = 9.7$  Hz), 131.33 (d,  $J = 11.4$  Hz), 122.60 (d,  $J = 8.5$  Hz), 122.58 (d,  $J = 98.8$  Hz), 114.10 (d,  $J = 12.3$  Hz), 61.39, 55.24, 51.71 (d,  $J = 3.2$  Hz), 34.95 (d,  $J = 65.5$  Hz), 31.70 (d,  $J = 2.2$  Hz), 21.56 (d,  $J = 70.7$  Hz), 14.00, 5.27 (d,  $J = 5.1$  Hz).  $^{31}\text{P NMR}$  (202 MHz, Chloroform- $d$ )  $\delta$  39.5. **HRMS** (ESI) calcd for  $\text{C}_{20}\text{H}_{29}\text{O}_6\text{PNa}^+$   $[\text{M}+\text{Na}]^+$  419.1594, Found 419.1595. The enantiomeric excess was determined by Daicel Chiralcel OD-H (88% ee),  $n$ -Hexanes/IPA = 80/20, 1 mL/min,  $\lambda = 210$  nm,  $t$  (major) = 8.78 min,  $t$  (minor) = 7.69 min.  $[\alpha]_{\text{D}}^{20} = -12.7$  ( $c = 1.2$ , acetone).

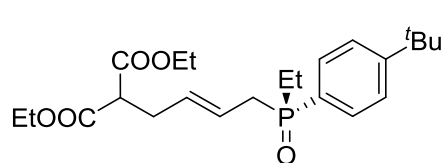

**(3m)** Colorless oil,  $R_f = 0.32$  (Ethyl acetate/methanol = 7:1), 66% yield (27.8 mg),  $^1\text{H NMR}$  (500 MHz, Chloroform- $d$ )  $\delta$  7.58 (dd,  $J = 10.5$ , 8.4 Hz, 2H), 7.48 (dd,  $J = 8.4$ , 2.5 Hz, 2H), 5.52 (m, 2H), 4.25 – 4.08 (m, 4H), 3.32 (t,  $J = 7.5$  Hz, 1H), 2.78 – 2.66 (m, 2H), 2.59 (qd,  $J = 4.8$ , 1.9 Hz, 2H), 1.98 (ddq,  $J = 15.3$ , 13.0, 7.6 Hz, 1H), 1.85 (ddq,  $J = 15.2$ , 9.6, 7.6 Hz, 1H), 1.33 (s, 9H), 1.24 (t,  $J = 7.1$  Hz, 6H), 1.10 (dt,  $J = 17.0$ , 7.7 Hz, 3H).  $^{13}\text{C NMR}$  (126 MHz, Chloroform- $d$ )  $\delta$  168.75 (d,  $J = 2.2$  Hz),

155.02 (d,  $J = 2.8$  Hz), 131.28 (d,  $J = 11.4$  Hz), 130.39 (d,  $J = 8.9$  Hz), 128.36 (d,  $J = 95.0$  Hz), 125.53 (d,  $J = 11.4$  Hz), 122.70 (d,  $J = 8.3$  Hz), 61.42 (d,  $J = 2.4$  Hz), 51.71 (d,  $J = 3.2$  Hz), 34.92, 34.84 (d,  $J = 65.1$  Hz), 31.75 (d,  $J = 2.2$  Hz), 31.08, 21.41 (d,  $J = 70.6$  Hz), 14.04, 5.34 (d,  $J = 5.0$  Hz).  **$^{31}\text{P}$  NMR** (202 MHz, Chloroform- $d$ )  $\delta$  39.2. **HRMS** (ESI) calcd for  $\text{C}_{23}\text{H}_{36}\text{O}_5\text{P}^+$   $[\text{M}+\text{H}]^+$  423.2295, Found 423.2298. The enantiomeric excess was determined by Daicel Chiralcel AD-H (80% ee), *n*-Hexanes/IPA = 80/20, 1 mL/min,  $\lambda = 210$  nm,  $t$  (major) = 6.29 min,  $t$  (minor) = 6.94 min.  $[\alpha]_{\text{D}}^{20} = -11.6$  ( $c = 0.8$ , acetone).

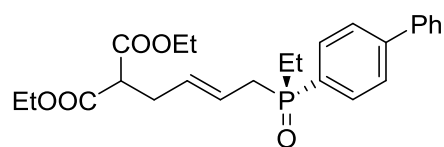

**(3n)** White solid,  $R_f = 0.35$  (Ethyl acetate/methanol = 4:1), 84% yield (37.2 mg),  **$^1\text{H}$  NMR** (500 MHz, Chloroform- $d$ )  $\delta$  7.82 – 7.66 (m, 4H), 7.66 – 7.55 (m, 2H), 7.49 – 7.41 (m, 2H), 7.42 – 7.33 (m, 1H), 5.53 (m, 2H), 4.24 – 4.02 (m, 4H), 3.33 (t,  $J = 7.5$  Hz, 1H), 2.83 – 2.69 (m, 2H), 2.66 – 2.54 (m, 2H), 2.03 (ddq,  $J = 15.3, 12.9, 7.6$  Hz, 1H), 1.91 (ddq,  $J = 15.2, 9.5, 7.7$  Hz, 1H), 1.22 (td,  $J = 7.1, 4.2$  Hz, 6H), 1.13 (dt,  $J = 17.2, 7.7$  Hz, 3H).  **$^{13}\text{C}$  NMR** (126 MHz, Chloroform- $d$ )  $\delta$  168.71 (d,  $J = 2.4$  Hz), 144.45 (d,  $J = 2.8$  Hz), 139.82, 131.64 (d,  $J = 11.5$  Hz), 131.05 (d,  $J = 8.8$  Hz), 130.03 (d,  $J = 93.8$  Hz), 128.88, 128.07, 127.20 (d,  $J = 11.4$  Hz), 127.19, 122.29 (d,  $J = 8.5$  Hz), 61.42, 51.66 (d,  $J = 3.2$  Hz), 34.72 (d,  $J = 65.3$  Hz), 31.69, 21.47 (d,  $J = 70.5$  Hz), 13.99 (d,  $J = 1.6$  Hz), 5.29 (d,  $J = 5.2$  Hz).  **$^{31}\text{P}$  NMR** (202 MHz, Chloroform- $d$ )  $\delta$  40.0. **HRMS** (ESI) calcd for  $\text{C}_{25}\text{H}_{32}\text{O}_5\text{P}^+$   $[\text{M}+\text{H}]^+$  443.1982, Found 443.1986. The enantiomeric excess was determined by Daicel Chiralcel OD-H (87% ee), *n*-Hexanes/IPA = 80/20, 1 mL/min,  $\lambda = 210$  nm,  $t$  (major) = 10.59 min,  $t$  (minor) = 8.86 min.  $[\alpha]_{\text{D}}^{20} = -11.0$  ( $c = 0.4$ , acetone).

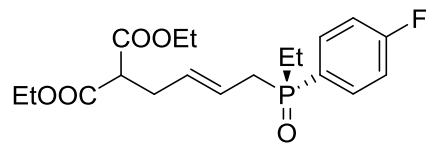

**(3o)** Colorless oil,  $R_f = 0.31$  (Ethyl acetate/methanol = 4:1), 64% yield (24.6 mg),  **$^1\text{H}$  NMR** (500 MHz, Chloroform- $d$ )  $\delta$  7.76 – 7.57 (m, 2H), 7.17 (td,  $J = 8.7, 2.0$  Hz, 2H), 5.49 (m, 2H), 4.24 – 4.07 (m, 4H), 3.30 (t,  $J = 7.4$  Hz, 1H), 2.79 – 2.65 (m, 2H), 2.58 (tdd,  $J = 7.8, 4.0, 2.2$  Hz, 2H), 2.00 (ddq,  $J = 15.2, 12.8, 7.6$  Hz, 1H), 1.86 (ddq,  $J = 15.2, 9.5, 7.6$  Hz, 1H), 1.24 (t,  $J = 7.1$  Hz, 5H), 1.10 (dt,  $J = 17.2, 7.7$  Hz, 3H).  **$^{13}\text{C}$  NMR** (126 MHz, Chloroform- $d$ )  $\delta$  168.69 (d,  $J = 3.1$  Hz), 164.90 (dd,  $J = 252.7, 3.1$  Hz), 133.04 (t,  $J = 9.3$  Hz), 131.78 (d,  $J = 11.5$  Hz), 127.49 (dd,  $J = 94.7, 3.3$  Hz), 122.18 (d,  $J = 8.7$  Hz), 115.92 (dd,  $J = 21.3, 12.2$  Hz), 61.45, 51.66 (d,  $J = 3.2$  Hz), 34.85 (d,  $J = 65.6$  Hz), 31.69 (d,  $J = 2.3$  Hz), 21.59 (d,  $J = 70.6$  Hz), 14.03, 5.25 (d,  $J = 5.3$  Hz).  **$^{31}\text{P}$  NMR** (202 MHz, Chloroform- $d$ )  $\delta$  39.0.  **$^{19}\text{F}$  NMR** (471 MHz, Chloroform- $d$ )  $\delta$  -107.30. **HRMS** (ESI) calcd for  $\text{C}_{19}\text{H}_{26}\text{FO}_5\text{PNa}^+$   $[\text{M}+\text{Na}]^+$  407.1394, Found 407.1397. The enantiomeric excess was determined by Daicel Chiralcel OD-H (82% ee), *n*-Hexanes/IPA = 80/20, 1 mL/min,  $\lambda = 210$  nm,  $t$  (major) = 17.20 min,  $t$  (minor) = 16.23 min.  $[\alpha]_{\text{D}}^{20} = -7.2$  ( $c = 0.6$ , acetone).

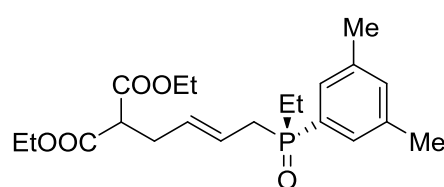

**(3p)** Colorless oil,  $R_f = 0.37$  (Ethyl acetate/methanol = 7:1), 58% yield (22.9 mg),  **$^1\text{H}$  NMR** (500 MHz, Methylene Chloride- $d_2$ )  $\delta$  7.25 (dd,  $J = 11.0, 1.7$  Hz, 2H), 7.16 (s, 1H), 5.54 – 5.43 (m, 2H), 4.13 (dtdd,  $J = 9.4, 6.9, 4.6, 2.4$  Hz, 5H), 3.30 (t,  $J = 7.5$  Hz, 1H), 2.70 – 2.60 (m, 2H), 2.58 – 2.51 (m, 2H), 2.36 (s, 6H), 1.94 (ddq,  $J = 15.2, 12.9, 7.7$  Hz, 1H), 1.81 (ddq,  $J = 15.1, 9.5, 7.7$  Hz, 1H), 1.23 (t,  $J = 7.1$  Hz, 6H), 1.05 (dt,  $J = 16.9, 7.7$  Hz, 3H).  **$^{13}\text{C}$  NMR** (126 MHz, Methylene Chloride- $d_2$ )  $\delta$  169.09 (d,  $J = 2.2$  Hz), 138.69 (d,  $J = 11.6$  Hz), 133.50 (d,  $J = 2.9$  Hz), 132.48 (d,  $J = 91.8$  Hz), 131.55 (d,  $J = 11.2$  Hz), 128.50 (d,  $J = 8.7$  Hz), 123.20 (d,  $J = 8.7$  Hz), 61.76, 52.24 (d,  $J = 3.2$  Hz), 35.15 (d,  $J = 3.2$  Hz).



= 64.6 Hz), 32.16 (d,  $J = 2.2$  Hz), 22.01 (d,  $J = 70.1$  Hz), 21.40, 14.26, 5.56 (d,  $J = 5.2$  Hz).  $^{31}\text{P}$  NMR (202 MHz, Methylene Chloride- $d_2$ )  $\delta$  38.1. HRMS (ESI) calcd for  $\text{C}_{21}\text{H}_{32}\text{O}_5\text{P}^+$  [M+Na] $^+$  395.1982, Found 395.1982. The enantiomeric excess was determined by Daicel Chiralcel OD-H (88% ee), *n*-Hexanes/IPA = 90/10, 1 mL/min,  $\lambda = 210$  nm,  $t$  (major) = 14.45 min,  $t$  (minor) = 12.26 min.  $[\alpha]_{\text{D}}^{20} = -7.0$  ( $c = 1.1$ , acetone).

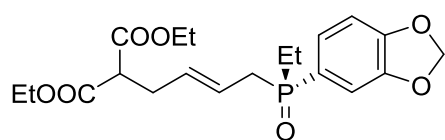

**(3q)** Colorless oil,  $R_f = 0.39$  (Ethyl acetate/methanol = 5:1), 68% yield (27.9 mg),  $^1\text{H}$  NMR (500 MHz, Chloroform- $d$ )  $\delta$  7.18 (ddd,  $J = 11.4, 7.9, 1.5$  Hz, 1H), 7.07 (dd,  $J = 10.3, 1.5$  Hz, 1H), 6.89 (dd,  $J = 7.9, 2.2$  Hz, 1H), 6.02 (s, 2H), 5.49 (m, 2H), 4.22 – 4.08 (m, 4H), 3.31 (t,  $J = 7.4$  Hz, 1H), 2.70 – 2.63 (m, 2H), 2.58 (qd,  $J = 4.6, 2.7$  Hz, 2H), 1.95 (ddq,  $J = 15.2, 13.0, 7.6$  Hz, 1H), 1.81 (ddq,  $J = 15.3, 9.5, 7.7$  Hz, 1H), 1.23 (t,  $J = 7.1$  Hz, 6H), 1.09 (dt,  $J = 17.1, 7.6$  Hz, 3H).  $^{13}\text{C}$  NMR (126 MHz, Chloroform- $d$ )  $\delta$  168.70 (d,  $J = 3.0$  Hz), 150.54 (d,  $J = 2.8$  Hz), 148.03 (d,  $J = 16.9$  Hz), 131.46 (d,  $J = 11.5$  Hz), 125.71 (d,  $J = 9.4$  Hz), 124.59 (d,  $J = 96.4$  Hz), 122.45 (d,  $J = 8.5$  Hz), 109.99 (d,  $J = 11.3$  Hz), 108.72 (d,  $J = 13.9$  Hz), 101.51, 61.40, 51.70 (d,  $J = 3.2$  Hz), 34.95 (d,  $J = 65.6$  Hz), 31.70 (d,  $J = 2.2$  Hz), 21.59 (d,  $J = 70.8$  Hz), 14.01, 5.27 (d,  $J = 5.3$  Hz).  $^{31}\text{P}$  NMR (202 MHz, Chloroform- $d$ )  $\delta$  39.7. HRMS (ESI) calcd for  $\text{C}_{20}\text{H}_{27}\text{O}_7\text{PNa}^+$  [M+Na] $^+$  433.1387, Found 433.1391. The enantiomeric excess was determined by Daicel Chiralcel OD-H (87% ee), *n*-Hexanes/IPA = 90/10, 1 mL/min,  $\lambda = 210$  nm,  $t$  (major) = 28.65 min,  $t$  (minor) = 25.79 min.  $[\alpha]_{\text{D}}^{20} = -5.7$  ( $c = 1.4$ , acetone).

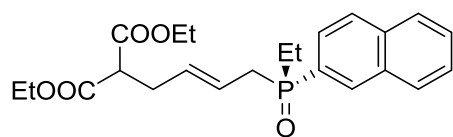

**(3r)** White solid,  $R_f = 0.32$  (Ethyl acetate/methanol = 5:1), 73% yield (30.4 mg),  $^1\text{H}$  NMR (500 MHz, Chloroform- $d$ )  $\delta$  8.34 (d,  $J = 12.6$  Hz, 1H), 8.01 – 7.81 (m, 3H), 7.65 – 7.48 (m, 3H), 5.62 – 5.45 (m, 2H), 4.20 – 4.04 (m, 4H), 3.30 (t,  $J = 7.4$  Hz, 1H), 2.80 (dd,  $J = 14.9, 6.3$  Hz, 2H), 2.56 (dt,  $J = 7.2, 3.2$  Hz, 2H), 2.08 (ddq,  $J = 15.3, 13.1, 7.6$  Hz, 1H), 1.95 (ddq,  $J = 15.3, 9.2, 7.7$  Hz, 1H), 1.21 (td,  $J = 7.1, 2.1$  Hz, 6H), 1.12 (dt,  $J = 17.2, 7.7$  Hz, 3H).  $^{13}\text{C}$  NMR (126 MHz, Chloroform- $d$ )  $\delta$  168.68 (d,  $J = 3.0$  Hz), 134.54 (d,  $J = 2.4$  Hz), 133.04 (d,  $J = 7.4$  Hz), 132.55 (d,  $J = 12.0$  Hz), 131.57 (d,  $J = 11.4$  Hz), 128.76, 128.69 (d,  $J = 92.4$  Hz), 128.29 (d,  $J = 11.0$  Hz), 127.99, 127.74, 126.90, 125.06 (d,  $J = 10.2$  Hz), 122.36 (d,  $J = 8.7$  Hz), 61.37, 51.65 (d,  $J = 3.2$  Hz), 34.83 (d,  $J = 65.1$  Hz), 31.68 (d,  $J = 2.2$  Hz), 21.51 (d,  $J = 70.3$  Hz), 13.99, 5.32 (d,  $J = 5.1$  Hz).  $^{31}\text{P}$  NMR (202 MHz, Chloroform- $d$ )  $\delta$  39.6. HRMS (ESI) calcd for  $\text{C}_{23}\text{H}_{30}\text{O}_5\text{P}^+$  [M+H] $^+$  417.1825, Found 417.1832. The enantiomeric excess was determined by Daicel Chiralcel OD-H (84% ee), *n*-Hexanes/IPA = 80/20, 1 mL/min,  $\lambda = 254$  nm,  $t$  (major) = 11.15 min,  $t$  (minor) = 9.72 min.  $[\alpha]_{\text{D}}^{20} = -15.9$  ( $c = 1.5$ , acetone).

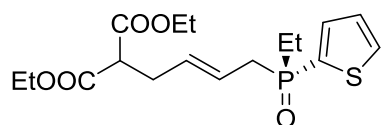

**(3s)** Colorless oil,  $R_f = 0.32$  (Ethyl acetate/methanol = 5:1), 91% yield (33.6 mg),  $^1\text{H}$  NMR (500 MHz, Chloroform- $d$ )  $\delta$  7.68 (ddd,  $J = 4.9, 3.8, 1.1$  Hz, 1H), 7.51 (ddd,  $J = 6.4, 3.6, 1.1$  Hz, 1H), 7.18 (ddd,  $J = 5.0, 3.5, 1.7$  Hz, 1H), 5.62 – 5.44 (m, 2H), 4.22 – 4.08 (m, 4H), 3.32 (t,  $J = 7.4$  Hz, 1H), 2.85 – 2.69 (m, 2H), 2.58 (dh,  $J = 5.9, 1.8$  Hz, 2H), 2.00 (ddq,  $J = 15.3, 12.8, 7.7$  Hz, 1H), 1.88 (ddq,  $J = 15.3, 10.5, 7.7$  Hz, 1H), 1.23 (t,  $J = 7.1$  Hz, 6H), 1.14 (dt,  $J = 17.9, 7.6$  Hz, 3H).  $^{13}\text{C}$  NMR (126 MHz, Chloroform- $d$ )  $\delta$  168.64 (d,  $J = 1.8$  Hz), 134.95 (d,  $J = 8.2$  Hz), 132.62 (d,  $J = 3.8$  Hz), 132.16 (d,  $J = 97.6$  Hz), 131.97 (d,  $J = 12.0$  Hz), 128.22 (d,  $J = 12.7$  Hz), 61.39, 51.64

(d,  $J = 3.5$  Hz), 35.86 (d,  $J = 68.8$  Hz), 31.67 (d,  $J = 2.3$  Hz), 23.23 (d,  $J = 73.6$  Hz), 13.99, 5.34 (d,  $J = 5.1$  Hz).  $^{31}\text{P}$  NMR (202 MHz, Chloroform- $d$ )  $\delta$  36.3. HRMS (ESI) calcd for  $\text{C}_{17}\text{H}_{25}\text{O}_5\text{PSNa}^+$   $[\text{M}+\text{H}]^+$  395.1053, Found 395.1041. The enantiomeric excess was determined by Daicel Chiralcel OD-H (90% ee),  $n$ -Hexanes/IPA = 80/20, 1 mL/min,  $\lambda = 210$  nm,  $t$  (major) = 12.42 min,  $t$  (minor) = 9.84 min.  $[\alpha]_{\text{D}}^{20} = -16.5$  ( $c = 1.6$ , acetone).

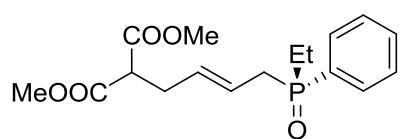

(**3t**) Colorless oil,  $R_f = 0.30$  (Ethyl acetate/methanol = 5:1), 67% yield (22.8 mg),  $^1\text{H}$  NMR (500 MHz, Chloroform- $d$ )  $\delta$  7.72 – 7.60 (m, 2H), 7.54 – 7.40 (m, 3H), 5.59 – 5.40 (m, 2H), 3.70 (d,  $J = 1.1$  Hz, 6H), 3.34 (t,  $J = 7.5$  Hz, 1H), 2.79 – 2.65 (m, 2H), 2.57 (qd,  $J = 6.0, 5.6, 3.5$  Hz, 2H), 2.00 (ddq,  $J = 15.3, 13.0, 7.6$  Hz, 1H), 1.86 (ddq,  $J = 15.3, 9.5, 7.6$  Hz, 1H), 1.10 (dt,  $J = 17.1, 7.7$  Hz, 3H).  $^{13}\text{C}$  NMR (126 MHz, Chloroform- $d$ )  $\delta$  169.06 (d,  $J = 2.3$  Hz), 131.62 (d,  $J = 92.8$  Hz), 131.61 (d,  $J = 2.8$  Hz), 131.26 (d,  $J = 11.5$  Hz), 130.51 (d,  $J = 8.7$  Hz), 128.52 (d,  $J = 11.1$  Hz), 122.56 (d,  $J = 8.7$  Hz), 52.53, 51.35 (d,  $J = 3.4$  Hz), 34.68 (d,  $J = 64.9$  Hz), 31.76 (d,  $J = 2.2$  Hz), 21.49 (d,  $J = 70.3$  Hz), 5.29 (d,  $J = 5.3$  Hz).  $^{31}\text{P}$  NMR (202 MHz, Chloroform- $d$ )  $\delta$  39.5. HRMS (ESI) calcd for  $\text{C}_{17}\text{H}_{24}\text{O}_5\text{P}^+$   $[\text{M}+\text{H}]^+$  339.1356, Found 339.1360. The enantiomeric excess was determined by Daicel Chiralcel OD-H (90% ee),  $n$ -Hexanes/IPA = 80/20, 1 mL/min,  $\lambda = 210$  nm,  $t$  (major) = 13.07 min,  $t$  (minor) = 10.60 min.  $[\alpha]_{\text{D}}^{20} = -6.7$  ( $c = 0.8$ , acetone).

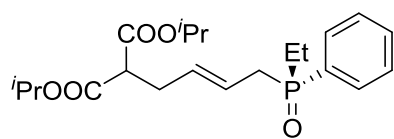

(**3u**) Colorless oil,  $R_f = 0.32$  (Ethyl acetate/methanol = 7:1), 71% yield (28.1 mg),  $^1\text{H}$  NMR (500 MHz, Chloroform- $d$ )  $\delta$  7.75 – 7.60 (m, 2H), 7.54 – 7.40 (m, 3H), 5.49 (m, 2H), 4.99 (heptd,  $J = 6.3, 2.2$  Hz, 2H), 3.22 (t,  $J = 7.5$  Hz, 1H), 2.76 – 2.62 (m, 2H), 2.61 – 2.49 (m, 2H), 1.99 (ddq,  $J = 15.3, 12.9, 7.7$  Hz, 1H), 1.86 (ddq,  $J = 15.3, 9.6, 7.7$  Hz, 1H), 1.19 (dt,  $J = 6.0, 2.7$  Hz, 11H), 1.08 (dt,  $J = 17.2, 7.7$  Hz, 3H).  $^{13}\text{C}$  NMR (126 MHz, Chloroform- $d$ )  $\delta$  168.23 (d,  $J = 1.7$  Hz), 131.69 (d,  $J = 92.5$  Hz), 131.68 (d,  $J = 11.5$  Hz), 131.57 (d,  $J = 2.8$  Hz), 130.51 (d,  $J = 8.4$  Hz), 128.48 (d,  $J = 11.1$  Hz), 122.17 (d,  $J = 8.6$  Hz), 68.84 (d,  $J = 2.2$  Hz), 52.00 (d,  $J = 3.2$  Hz), 34.74 (d,  $J = 65.1$  Hz), 31.59 (d,  $J = 2.2$  Hz), 21.54 (d,  $J = 8.2$  Hz), 21.36 (d,  $J = 70.3$  Hz), 5.24 (d,  $J = 5.2$  Hz).  $^{31}\text{P}$  NMR (202 MHz, Chloroform- $d$ )  $\delta$  37.6. HRMS (ESI) calcd for  $\text{C}_{21}\text{H}_{32}\text{O}_5\text{P}^+$   $[\text{M}+\text{Na}]^+$  395.1982, Found 395.1987. The enantiomeric excess was determined by Daicel Chiralcel OD-H (92% ee),  $n$ -Hexanes/IPA = 90/10, 1 mL/min,  $\lambda = 210$  nm,  $t$  (major) = 12.61 min,  $t$  (minor) = 10.54 min.  $[\alpha]_{\text{D}}^{20} = -9.2$  ( $c = 1.6$ , acetone).

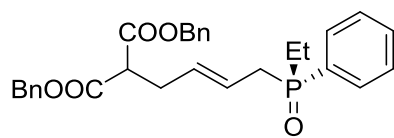

(**3v**) Colorless oil,  $R_f = 0.35$  (Ethyl acetate/methanol = 7:1), 64% yield (31.4 mg),  $^1\text{H}$  NMR (500 MHz, Methylene Chloride- $d_2$ )  $\delta$  7.76 – 7.60 (m, 2H), 7.57 – 7.45 (m, 3H), 7.41 – 7.19 (m, 10H), 5.56 – 5.40 (m, 2H), 5.22 – 5.04 (m, 4H), 3.45 (t,  $J = 7.5$  Hz, 1H), 2.72 – 2.52 (m, 4H), 1.95 (m, 1H), 1.88 – 1.76 (m, 1H), 1.05 (dt,  $J = 17.0, 7.6$  Hz, 3H).  $^{13}\text{C}$  NMR (126 MHz, Methylene Chloride- $d_2$ )  $\delta$  168.75, 135.96, 132.81 (d,  $J = 91.7$  Hz), 131.83 (d,  $J = 2.5$  Hz), 131.36 (d,  $J = 11.2$  Hz), 130.96 (d,  $J = 8.5$  Hz), 128.90, 128.81, 128.68, 128.53, 123.34 (d,  $J = 8.6$  Hz), 67.46, 52.16 (d,  $J = 3.1$  Hz), 35.07 (d,  $J = 64.8$  Hz), 32.16 (d,  $J = 1.9$  Hz), 22.01 (d,  $J = 70.1$  Hz), 5.52 (d,  $J = 5.0$  Hz).  $^{31}\text{P}$  NMR (202 MHz, Methylene Chloride- $d_2$ )  $\delta$  37.9. HRMS (ESI) calcd for  $\text{C}_{29}\text{H}_{31}\text{O}_5\text{PNa}^+$   $[\text{M}+\text{Na}]^+$  513.1801, Found 513.1804. The enantiomeric excess was determined by Daicel Chiralcel OD-

H (89% ee), *n*-Hexanes/IPA = 70/30, 1 mL/min,  $\lambda$  = 210 nm, *t* (major) = 15.65 min, *t* (minor) = 12.33 min.  $[\alpha]_D^{20}$  = -7.0 (*c* = 1.6, acetone).

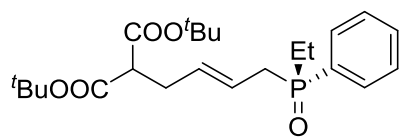

(**3w**) Colorless oil,  $R_f$  = 0.45 (Ethyl acetate/methanol = 10:1), 62% yield (26.3 mg),  $^1\text{H NMR}$  (500 MHz, Chloroform-*d*)  $\delta$  7.76 – 7.59 (m, 2H), 7.56 – 7.40 (m, 3H), 5.49 (m, 2H), 3.09 (t,  $J$  = 7.5 Hz, 1H), 2.70 (dd,  $J$  = 14.9, 5.3 Hz, 2H), 2.55 – 2.39 (m, 2H),

2.01 (m, 1H), 1.93 – 1.81 (m, 1H), 1.41 (s, 18H), 1.09 (dt,  $J$  = 17.1, 7.6 Hz, 3H).  $^{13}\text{C NMR}$  (126 MHz, Chloroform-*d*)  $\delta$  168.10, 132.07 (d,  $J$  = 11.6 Hz), 131.56 (d,  $J$  = 2.7 Hz), 131.76 (d,  $J$  = 92.0 Hz), 130.54 (d,  $J$  = 8.7 Hz), 128.48 (d,  $J$  = 11.1 Hz), 121.78 (d,  $J$  = 8.5 Hz), 81.47 (d,  $J$  = 2.3 Hz), 53.57 (d,  $J$  = 3.1 Hz), 34.80 (d,  $J$  = 65.2 Hz), 31.69 (d,  $J$  = 2.2 Hz), 27.86, 21.31 (d,  $J$  = 70.3 Hz), 5.25 (d,  $J$  = 5.1 Hz).  $^{31}\text{P NMR}$  (202 MHz, Chloroform-*d*)  $\delta$  39.5. **HRMS** (ESI) calcd for  $\text{C}_{23}\text{H}_{35}\text{O}_5\text{PNa}^+$   $[\text{M}+\text{Na}]^+$  445.2114, Found 445.2125. The enantiomeric excess was determined by Daicel Chiralcel OD-H (89% ee), *n*-Hexanes/IPA = 90/10, 1 mL/min,  $\lambda$  = 210 nm, *t* (major) = 8.38 min, *t* (minor) = 7.40 min.  $[\alpha]_D^{20}$  = -8.18 (*c* = 0.6, acetone).

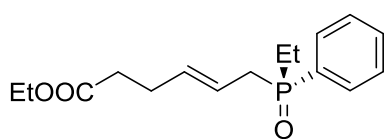

(**4a**) Colorless oil,  $R_f$  = 0.42 (Ethyl acetate/methanol = 5:1), 46% yield (13.5 mg),  $^1\text{H NMR}$  (500 MHz, Chloroform-*d*)  $\delta$  7.67 (dd,  $J$  = 10.7, 7.4 Hz, 2H), 7.59 – 7.44 (m, 3H), 5.56 – 5.39 (m, 2H), 4.10 (q,  $J$  = 7.1 Hz, 2H), 2.72 (dd,  $J$  = 15.0, 6.7 Hz, 2H), 2.30 (m,

4H), 2.02 (dp,  $J$  = 22.4, 7.7 Hz, 1H), 1.89 (dp,  $J$  = 16.0, 7.9 Hz, 1H), 1.23 (t,  $J$  = 7.0 Hz, 3H), 1.12 (dt,  $J$  = 16.2, 7.5 Hz, 3H).  $^{13}\text{C NMR}$  (126 MHz, Chloroform-*d*)  $\delta$  172.83, 134.33 (d,  $J$  = 11.4 Hz), 131.80 (d,  $J$  = 92.4 Hz), 131.58 (d,  $J$  = 2.7 Hz), 130.61 (d,  $J$  = 8.6 Hz), 128.49 (d,  $J$  = 11.3 Hz), 120.18 (d,  $J$  = 8.5 Hz), 60.34, 34.72 (d,  $J$  = 65.4 Hz), 33.77 (d,  $J$  = 3.2 Hz), 27.85 (d,  $J$  = 2.3 Hz), 21.53 (d,  $J$  = 70.0 Hz), 14.21, 5.34 (d,  $J$  = 5.0 Hz).  $^{31}\text{P NMR}$  (202 MHz, Chloroform-*d*)  $\delta$  39.7. **HRMS** (ESI) calcd for  $\text{C}_{16}\text{H}_{24}\text{O}_3\text{P}^+$   $[\text{M}+\text{H}]^+$  295.1458, Found 295.1457. The enantiomeric excess was determined by Daicel Chiralcel OD-H (90% ee), *n*-Hexanes/IPA = 90/10, 1 mL/min,  $\lambda$  = 210 nm, *t* (major) = 14.32 min, *t* (minor) = 12.65 min.  $[\alpha]_D^{20}$  = -6.81 (*c* = 0.9, acetone).

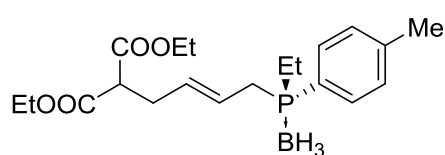

(**4i**) Colorless oil,  $R_f$  = 0.48 (Petroleum ether/ Ethyl acetate = 3:1), 58% yield (21.9 mg),  $^1\text{H NMR}$  (500 MHz, Acetone-*d*<sub>6</sub>)  $\delta$  7.67 (dd,  $J$  = 9.9, 8.1 Hz, 2H), 7.35 (dd,  $J$  = 8.1, 2.1 Hz, 2H), 5.63 – 5.41 (m, 2H), 4.29 – 4.02 (m, 4H), 3.37 (t,  $J$  = 7.4 Hz, 1H), 2.78 – 2.63 (m, 2H), 2.52 (ddd,  $J$  = 9.5, 4.9, 1.9

Hz, 2H), 2.40 (s, 3H), 1.99 (ddq,  $J$  = 15.2, 12.6, 7.7 Hz, 1H), 1.89 (ddq,  $J$  = 15.0, 8.8, 7.7 Hz, 1H), 1.22 (td,  $J$  = 7.1, 1.8 Hz, 6H), 1.01 (dt,  $J$  = 16.8, 7.6 Hz, 3H), 0.82 – 0.33 (m, 2H).  $^{13}\text{C NMR}$  (126 MHz, Acetone-*d*<sub>6</sub>)  $\delta$  169.41, 142.62 (d,  $J$  = 2.4 Hz), 133.29 (d,  $J$  = 8.7 Hz), 132.01 (d,  $J$  = 10.1 Hz), 130.36 (d,  $J$  = 9.7 Hz), 125.78 (d,  $J$  = 52.3 Hz), 124.53 (d,  $J$  = 6.5 Hz), 61.91, 52.60 (d,  $J$  = 2.9 Hz), 32.57 (d,  $J$  = 2.1 Hz), 30.66 (d,  $J$  = 34.6 Hz), 21.59, 17.87 (d,  $J$  = 37.3 Hz), 14.54, 7.26 (d,  $J$  = 1.1 Hz).  $^{31}\text{P NMR}$  (202 MHz, Acetone-*d*<sub>6</sub>)  $\delta$  16.4 (d,  $J$  = 72.3 Hz).  $^{11}\text{B NMR}$  (160 MHz, Acetone-*d*<sub>6</sub>)  $\delta$  -41.06 (qd,  $J$  = 96.5, 96.1, 58.5 Hz). **HRMS** (ESI) calcd for  $\text{C}_{20}\text{H}_{32}\text{BO}_4\text{PNa}^+$   $[\text{M}+\text{Na}]^+$  401.2023, Found 401.2018. The enantiomeric excess was determined by Daicel Chiralcel IF (89% ee), *n*-Hexanes/IPA = 90/10, 1 mL/min,  $\lambda$  = 210 nm, *t* (major) = 13.13 min, *t* (minor) = 14.12 min.  $[\alpha]_D^{20}$  = -6.37 (*c* = 2.1, acetone).

## 7. Supplementary references

1. Beaud, R.; Phipps, R. J.; Gaunt, M. J., Enantioselective Cu-Catalyzed Arylation of Secondary Phosphine Oxides with Diaryliodonium Salts toward the Synthesis of P-Chiral Phosphines. *J. Am. Chem. Soc.* **2016**, *138* (40), 13183-13186.
2. Liu, X.-T.; Zhang, Y.-Q.; Han, X.-Y.; Sun, S.-P.; Zhang, Q.-W., Ni-Catalyzed Asymmetric Allylation of Secondary Phosphine Oxides. *J. Am. Chem. Soc.* **2019**, *141* (42), 16584-16589.
3. Wu, J.-Q.; Qiu, Z.-P.; Zhang, S.-S.; Liu, J.-G.; Lao, Y.-X.; Gu, L.-Q.; Huang, Z.-S.; Li, J.; Wang, H., Rhodium(iii)-catalyzed C–H/C–C activation sequence: vinylcyclopropanes as versatile synthons in direct C–H allylation reactions. *Chem. Commun.* **2015**, *51* (1), 77-80.
4. Ieki, R.; Kani, Y.; Tsunoi, S.; Shibata, I., Transition-Metal-Free Coupling Reaction of Vinylcyclopropanes with Aldehydes Catalyzed by Tin Hydride. *Chem.–Eur. J.* **2015**, *21* (16), 6295-6300.
5. Abele, S.; Inauen, R.; Funel, J.-A.; Weller, T., Design and Scale-Up of a Practical Enantioselective Route to 5-Phenylbicyclo[2.2.2]oct-5-en-2-one. *Org. Process Res. Dev.* **2012**, *16* (1), 129-140.
6. Rajendran, K. V.; Gilheany, D. G., Simple unprecedented conversion of phosphine oxides and sulfides to phosphine boranes using sodium borohydride. *Chem. Commun.* **2012**, *48* (6), 817-819.

## 8. Copies of NMR Spectroscopic data

$^1\text{H}$  NMR spectra (500 MHz,  $\text{CDCl}_3$ ) of **3a**

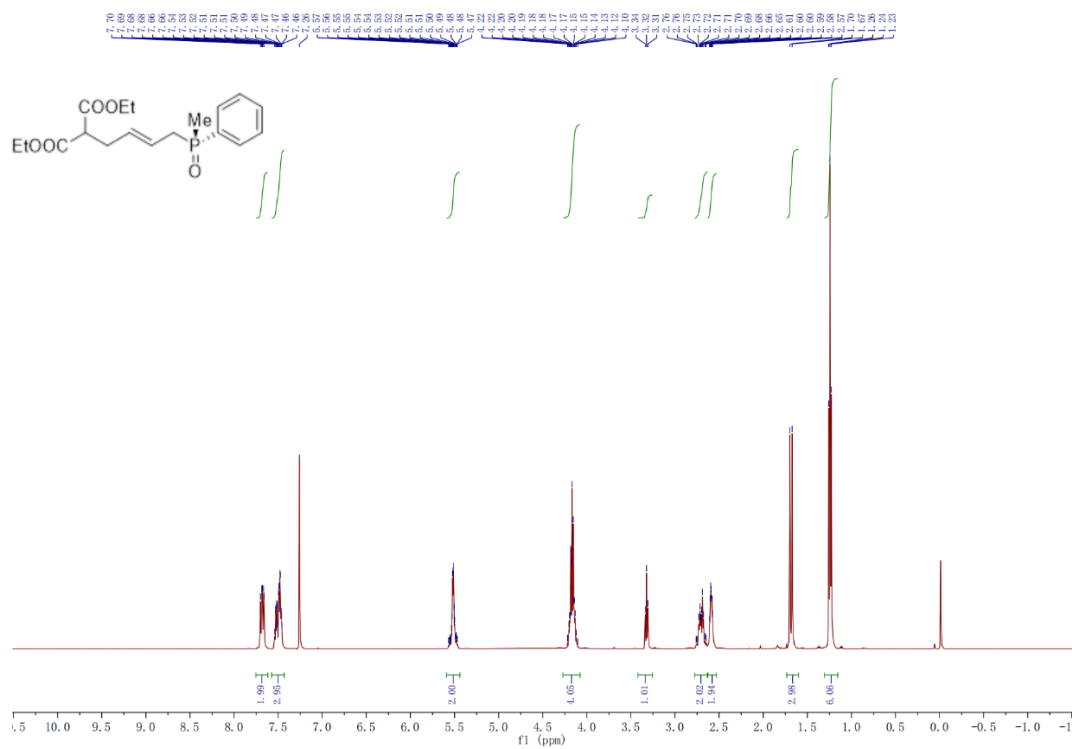

$^{13}\text{C}$  NMR spectra (126 MHz,  $\text{CDCl}_3$ ) of **3a**

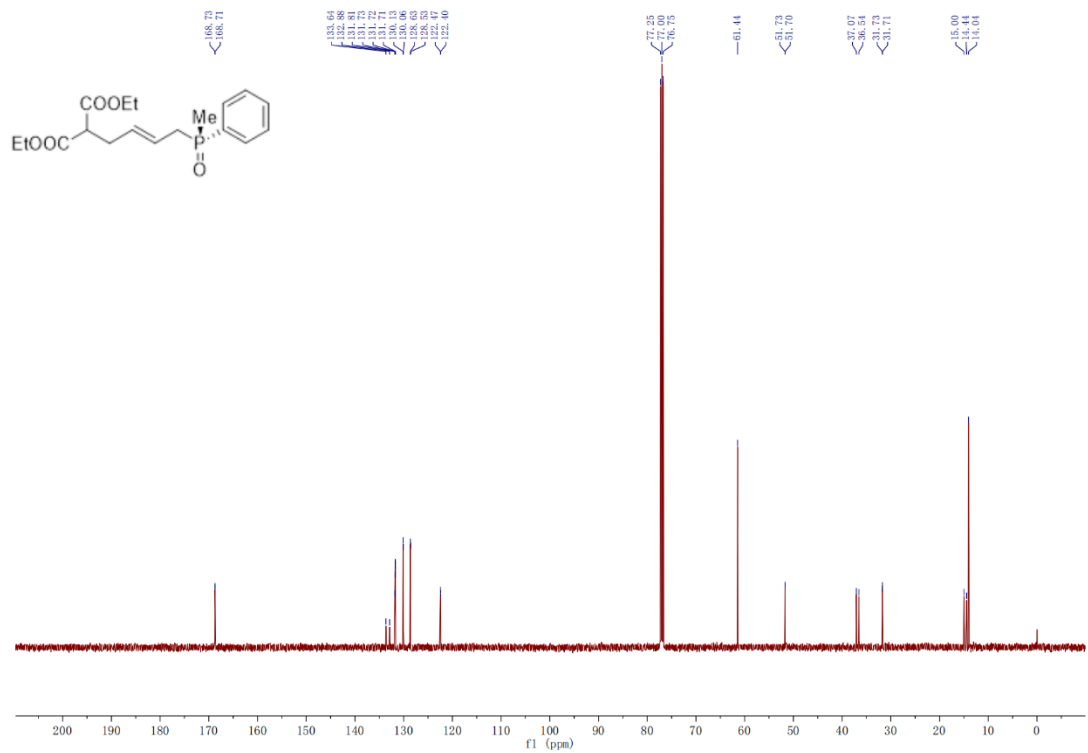

$^{31}\text{P}$  NMR spectra (202 MHz,  $\text{CDCl}_3$ ) of **3a**

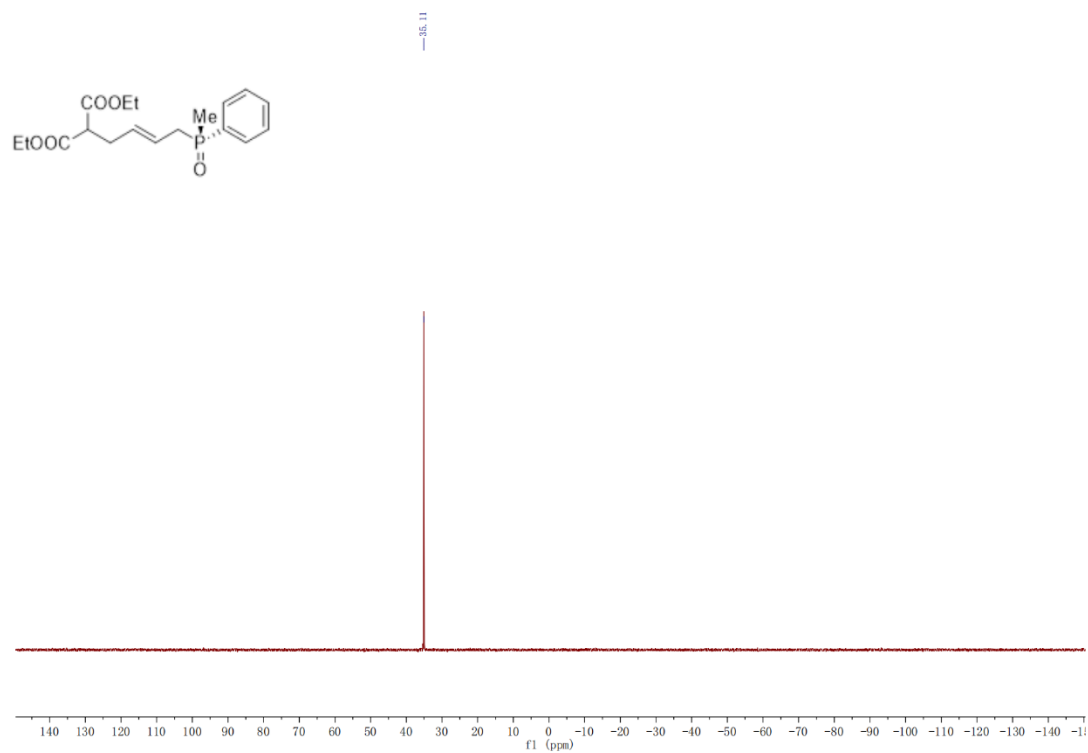

$^1\text{H}$  NMR spectra (500 MHz,  $\text{CDCl}_3$ ) of **3b**

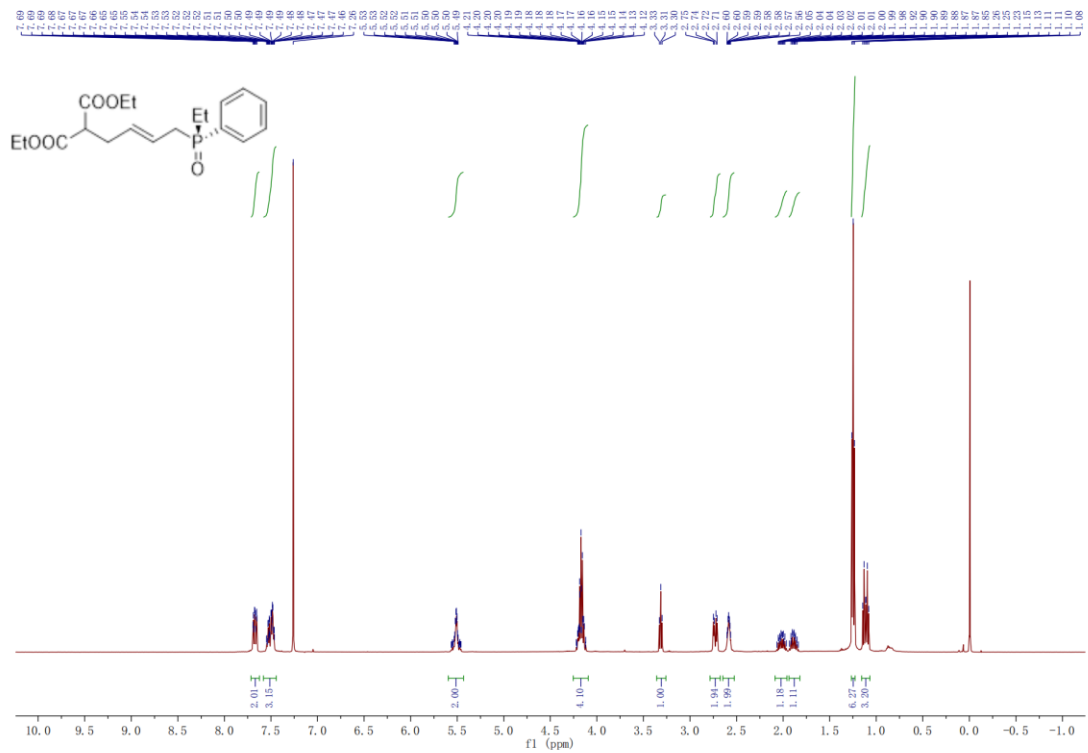

**<sup>13</sup>C NMR spectra (126 MHz, CDCl<sub>3</sub>) of 3b**

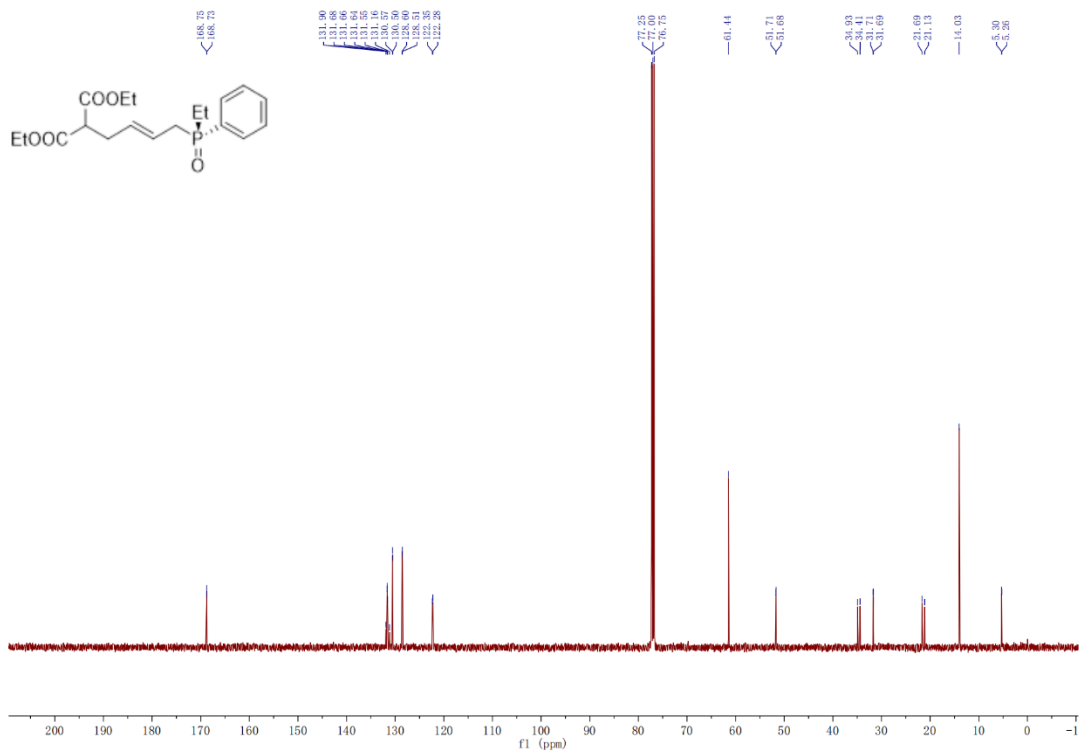

**<sup>31</sup>P NMR spectra (202 MHz, CDCl<sub>3</sub>) of 3b**

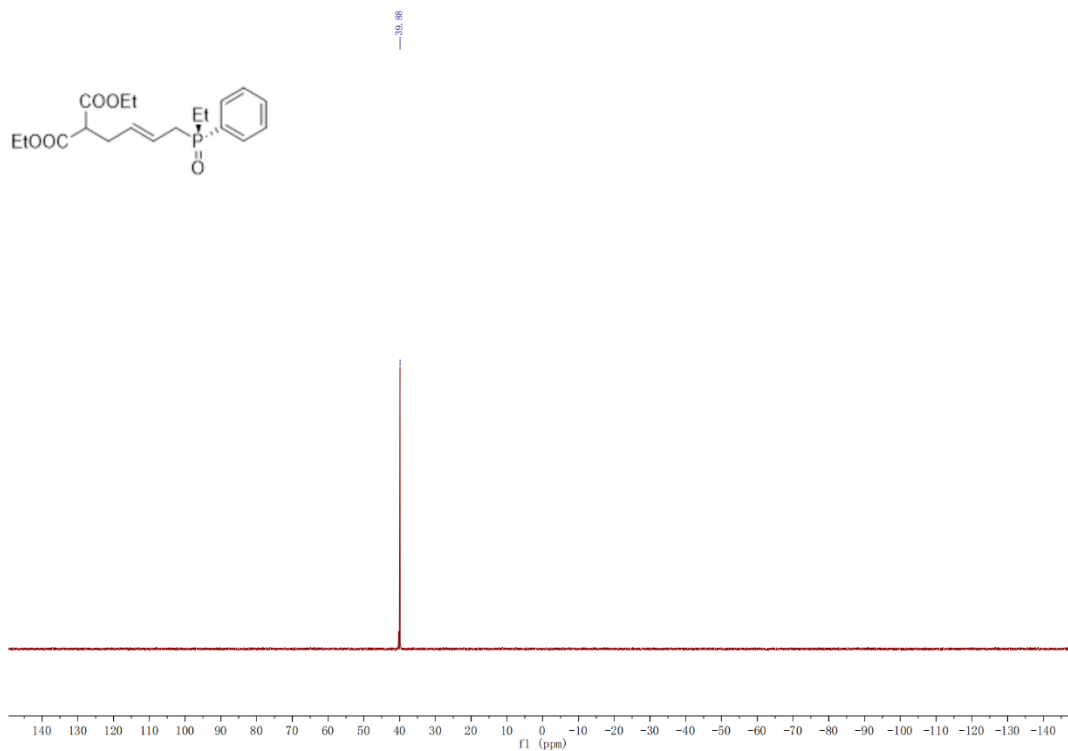

<sup>1</sup>H NMR spectra (500 MHz, CDCl<sub>3</sub>) of **3c**

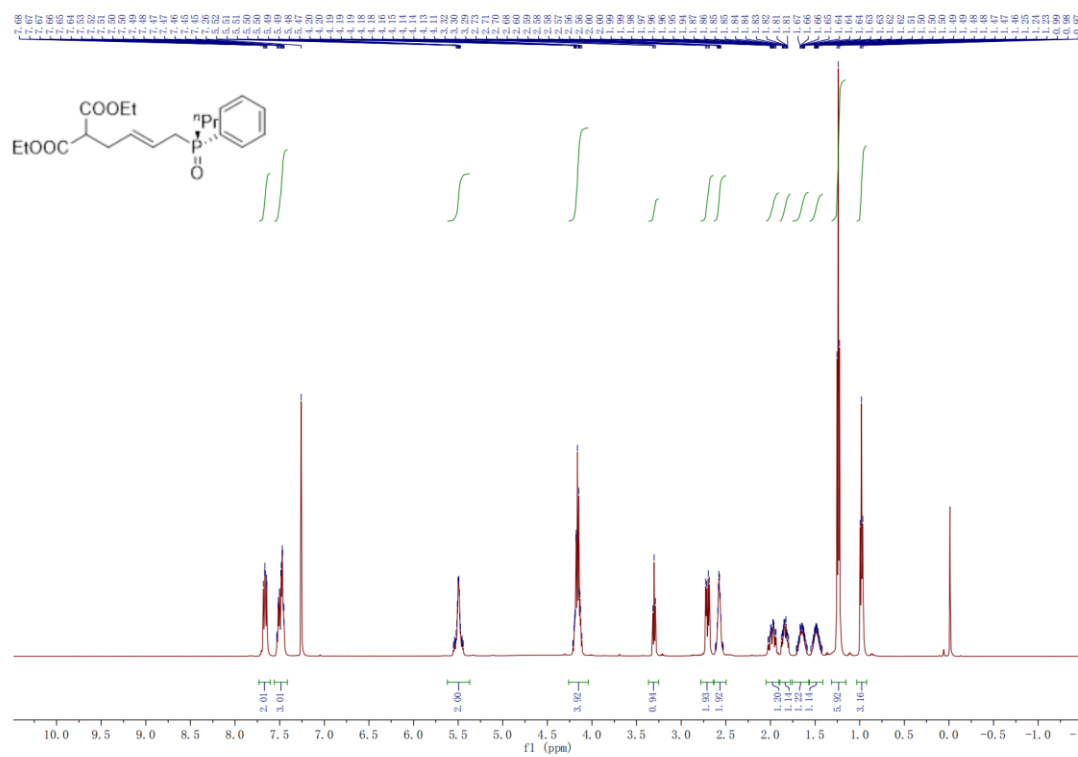

<sup>13</sup>C NMR spectra (126 MHz, CDCl<sub>3</sub>) of **3c**



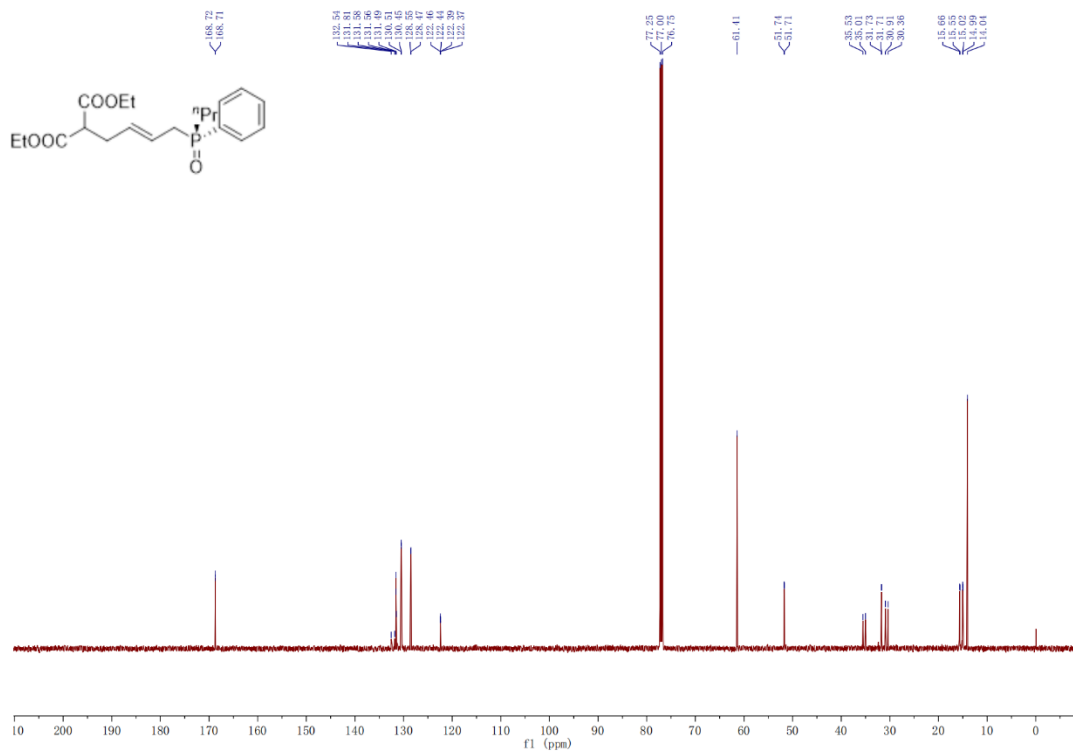

$^{31}\text{P}$  NMR spectra (202 MHz,  $\text{CDCl}_3$ ) of **3c**

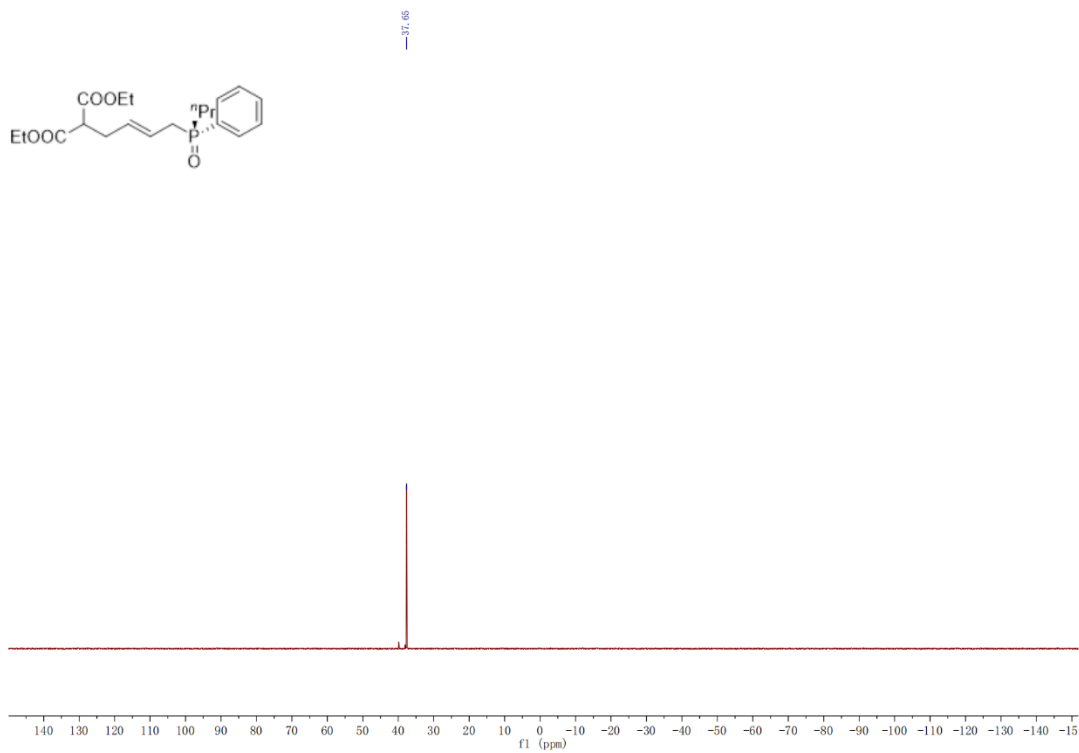

$^1\text{H}$  NMR spectra (500 MHz,  $\text{CD}_2\text{Cl}_2$ ) of **3d**

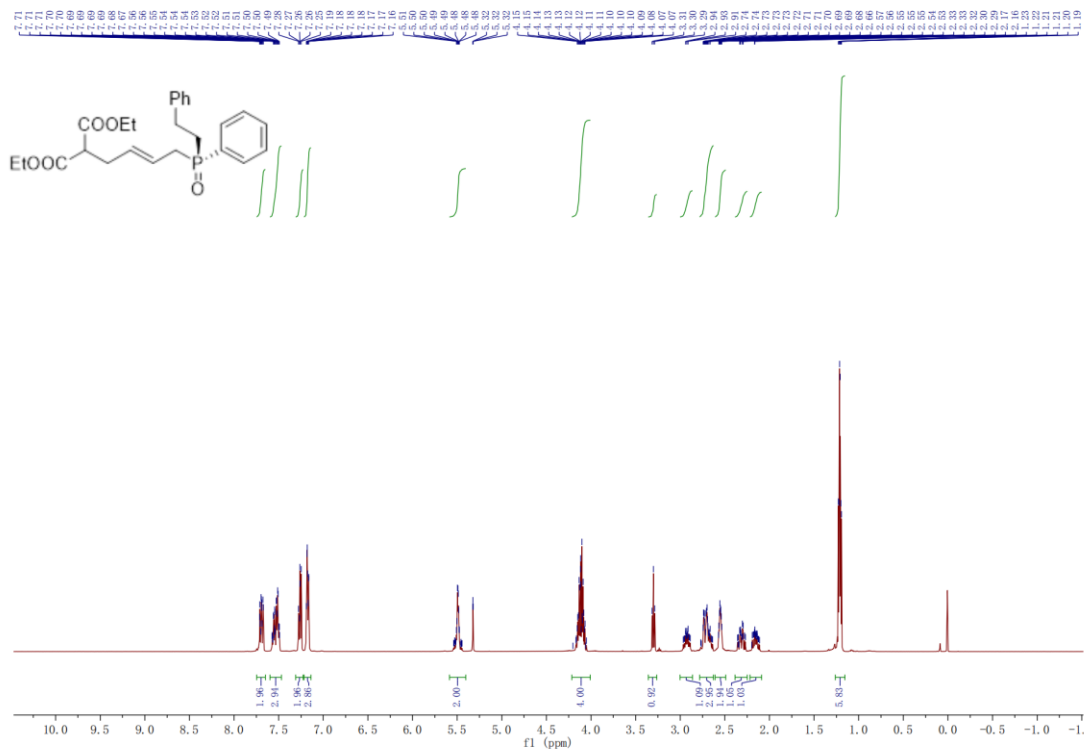

**<sup>13</sup>C NMR spectra (126 MHz, CD<sub>2</sub>Cl<sub>2</sub>) of **3d****

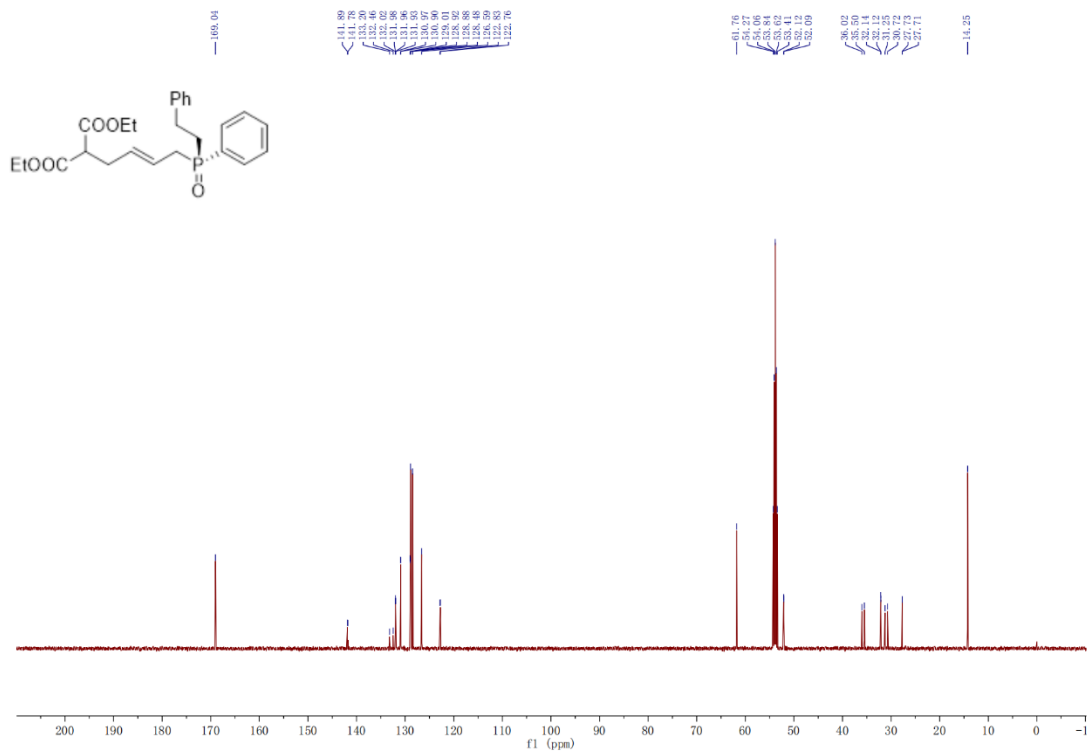

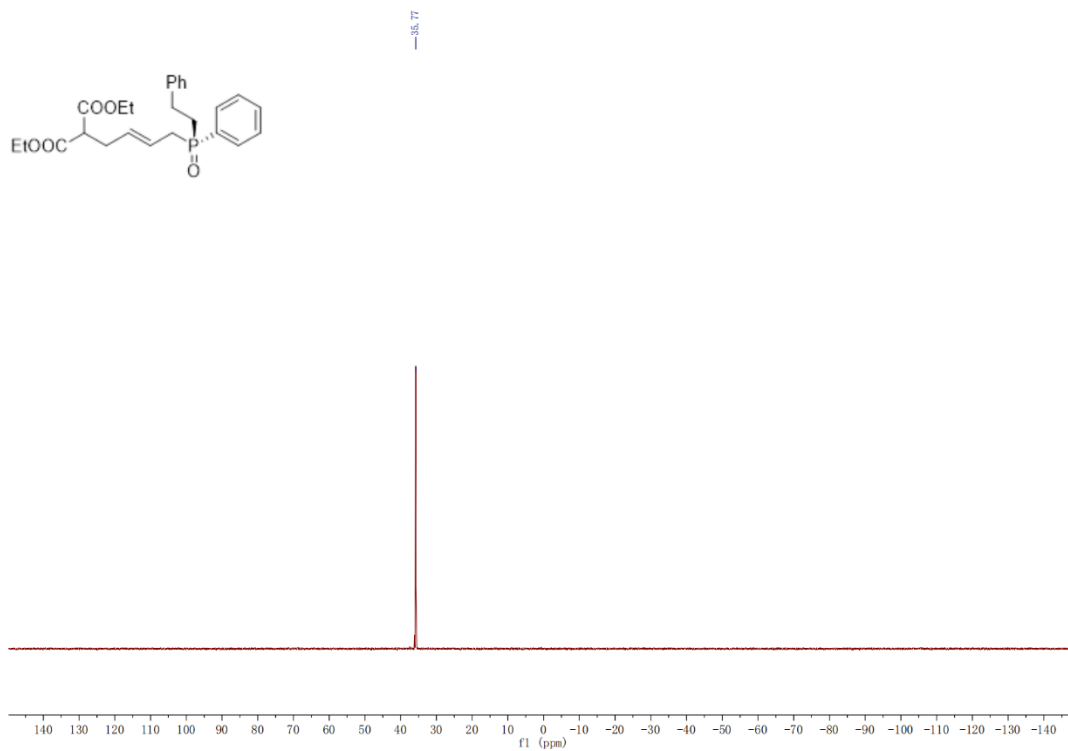

<sup>1</sup>H NMR spectra (500 MHz, CD<sub>3</sub>COCD<sub>3</sub>) of **3e**

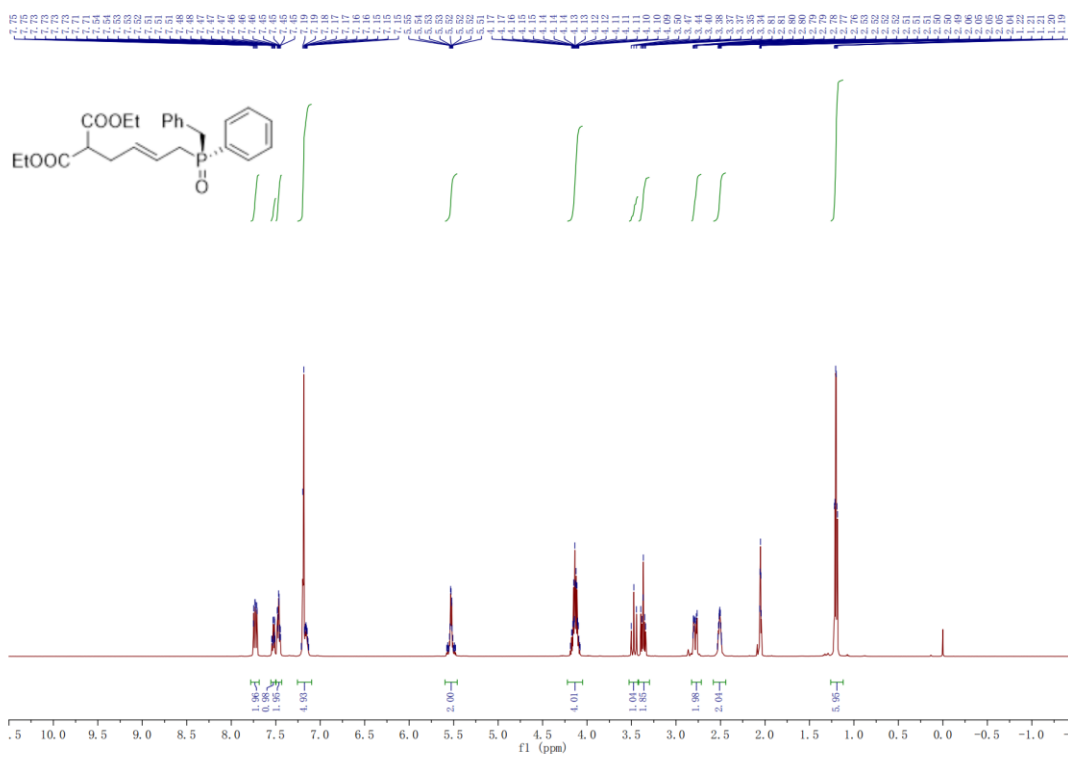

<sup>13</sup>C NMR spectra (126 MHz, CD<sub>3</sub>COCD<sub>3</sub>) of **3e**

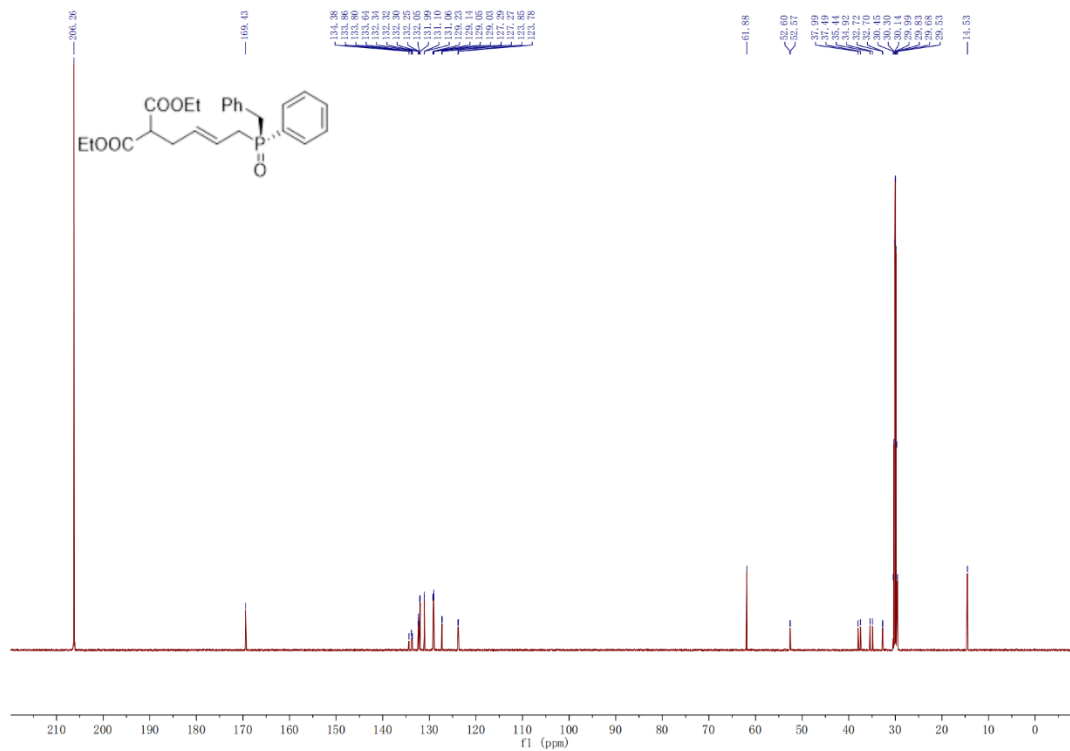

<sup>31</sup>P NMR spectra (202 MHz, CD<sub>3</sub>COCD<sub>3</sub>) of **3e**

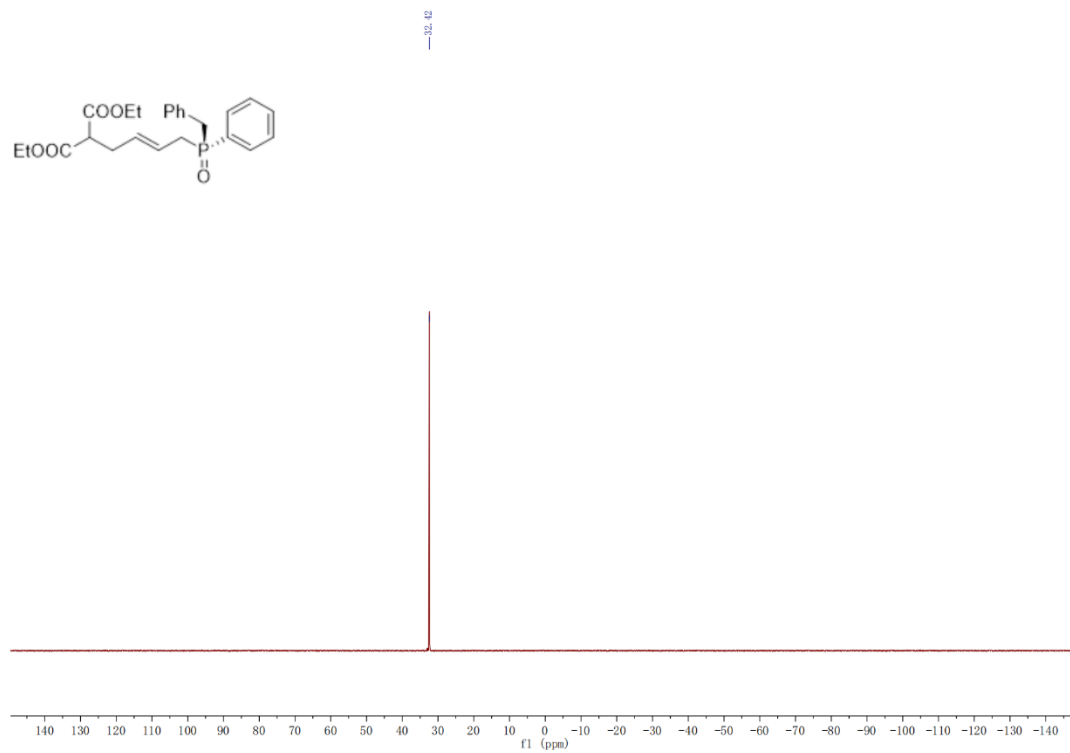

<sup>1</sup>H NMR spectra (500 MHz, CDCl<sub>3</sub>) of **3f**

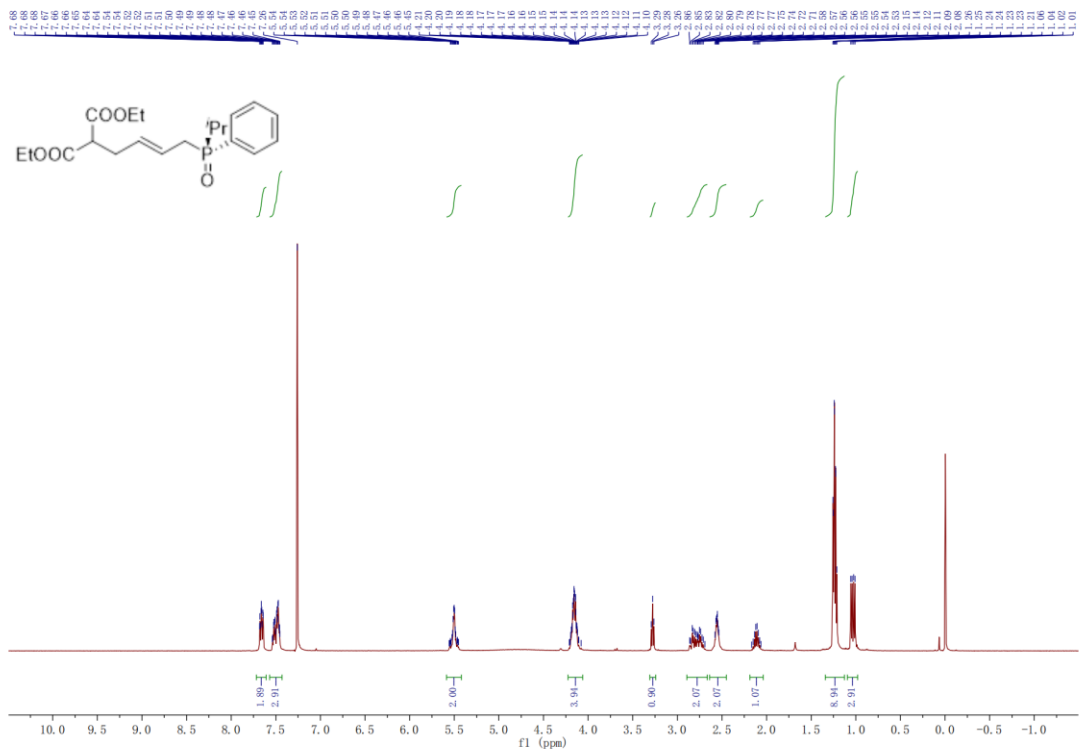

<sup>13</sup>C NMR spectra (126 MHz, CDCl<sub>3</sub>) of 3f

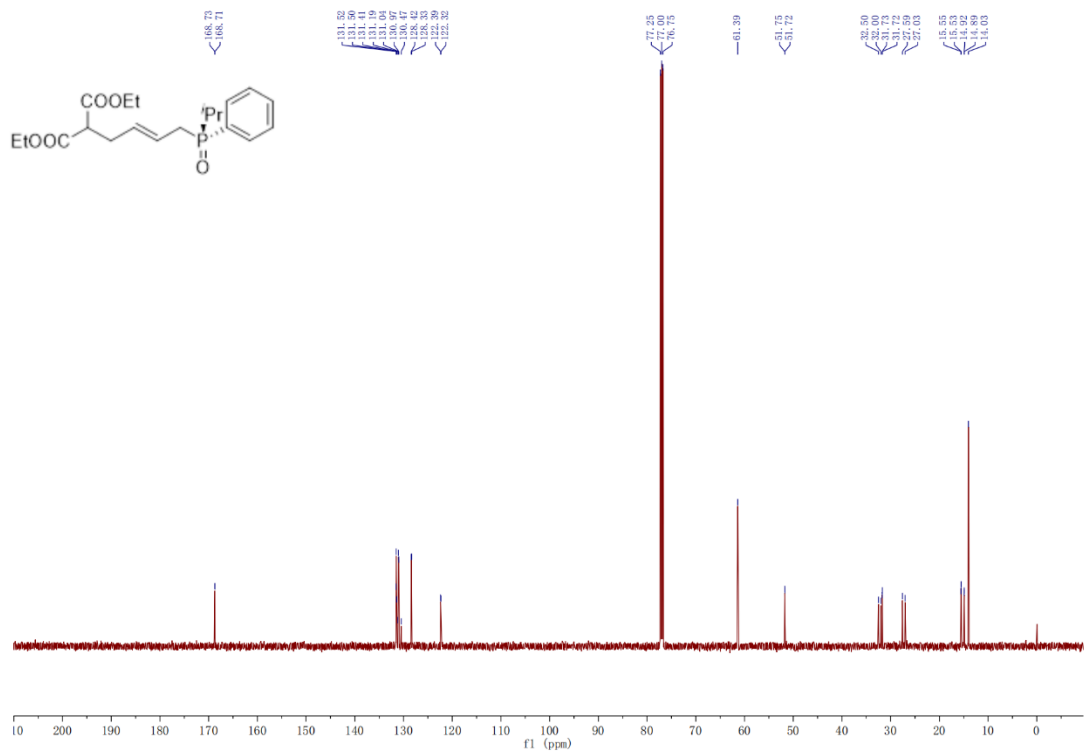

<sup>31</sup>P NMR spectra (202 MHz, CDCl<sub>3</sub>) of 3f

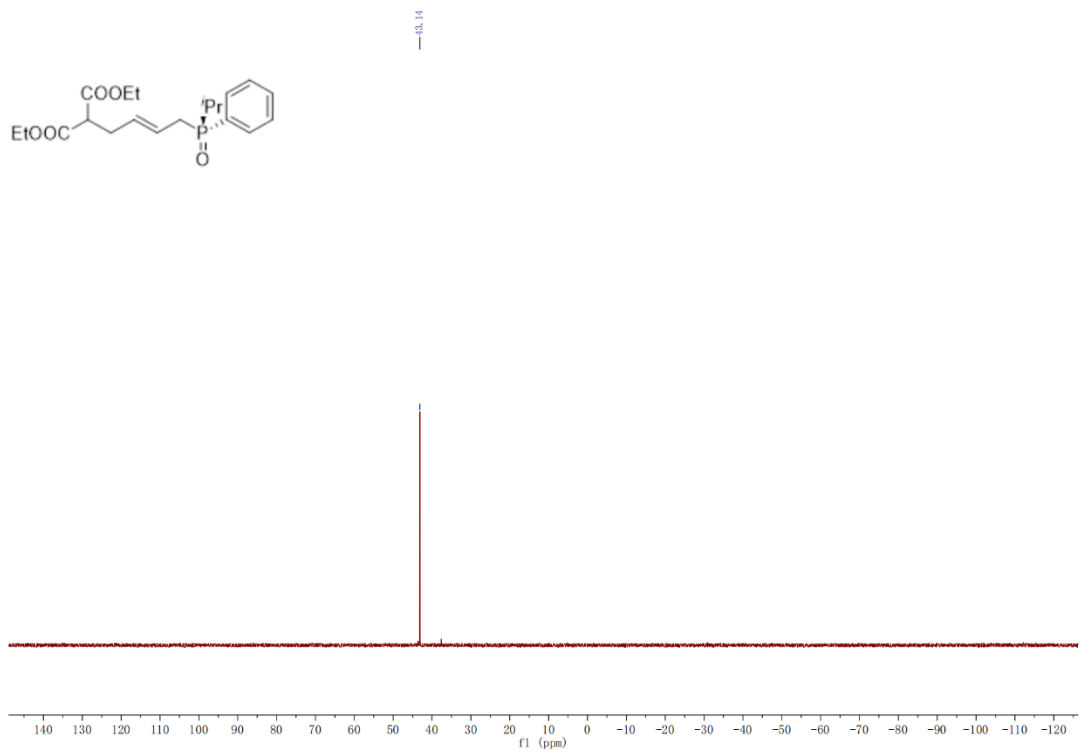

$^1\text{H}$  NMR spectra (500 MHz,  $\text{CDCl}_3$ ) of **3g**

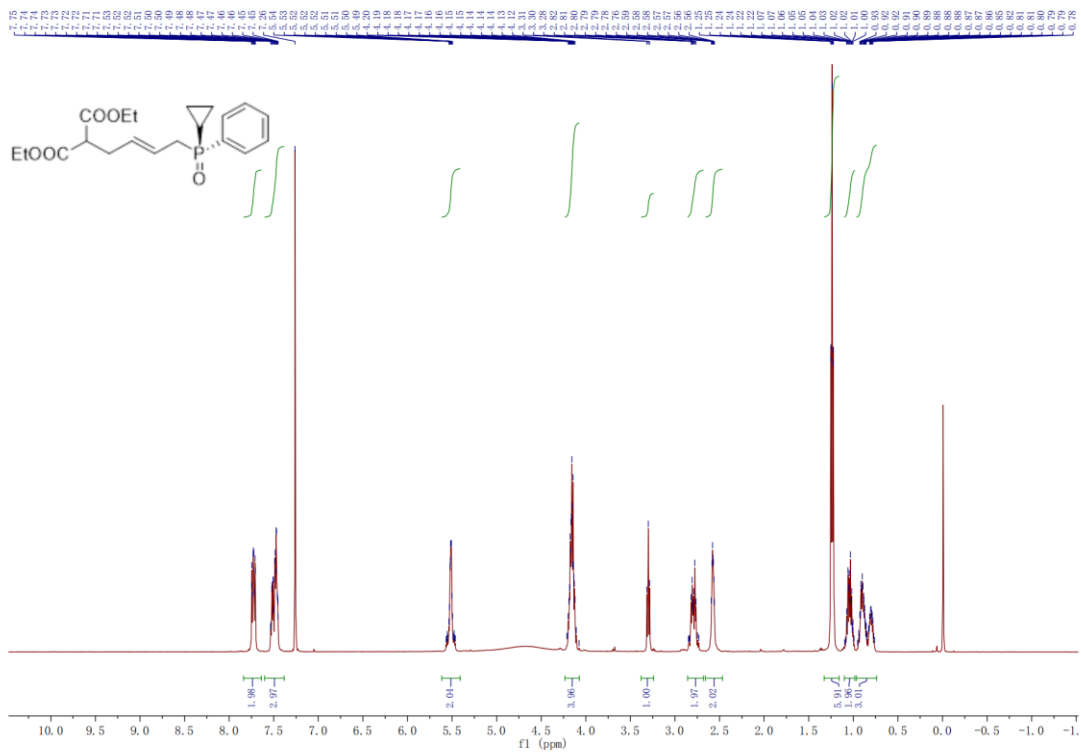

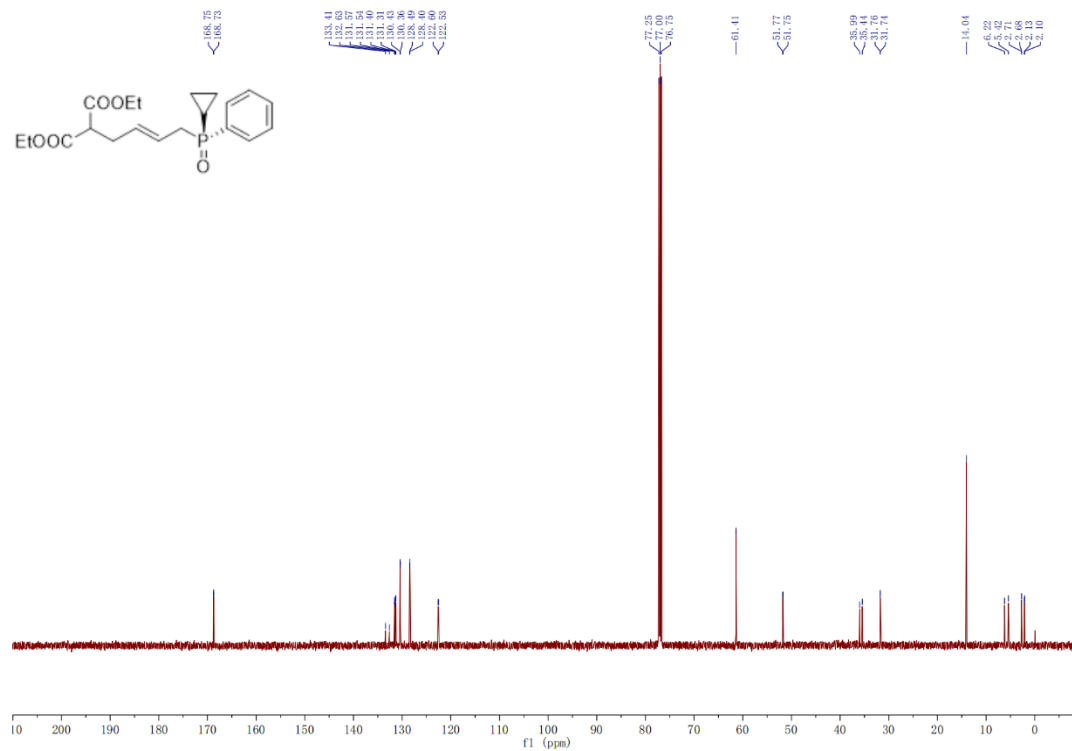

<sup>31</sup>P NMR spectra (202 MHz, CDCl<sub>3</sub>) of **3g**

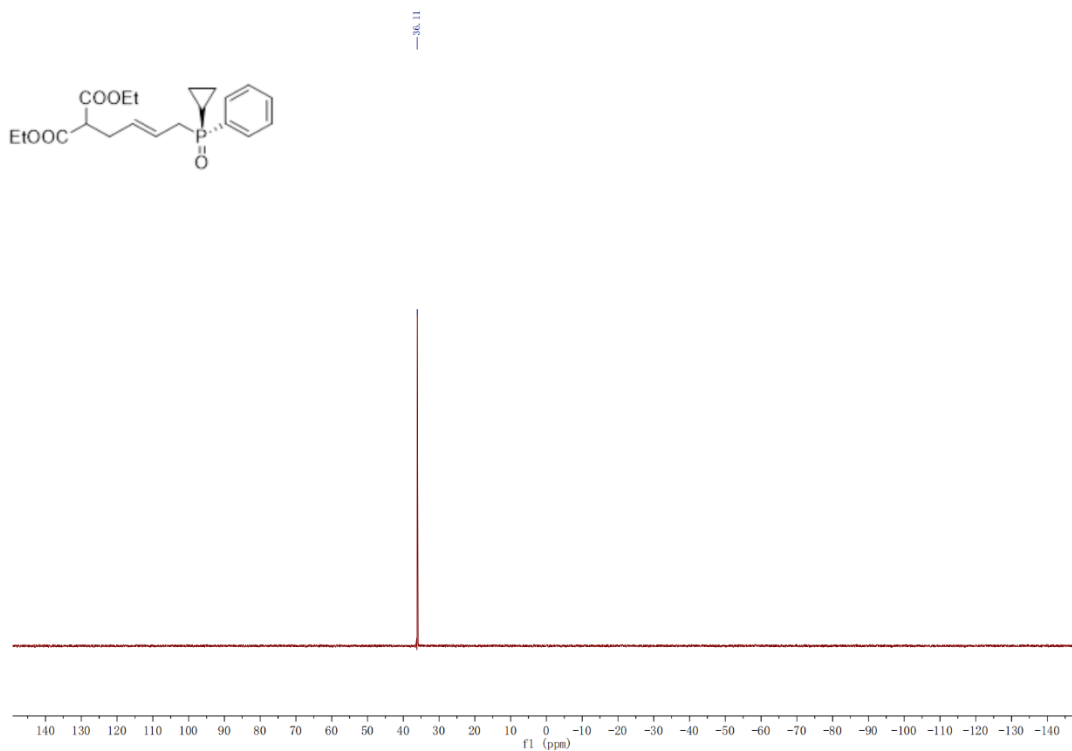

<sup>1</sup>H NMR spectra (500 MHz, CDCl<sub>3</sub>) of **3h**

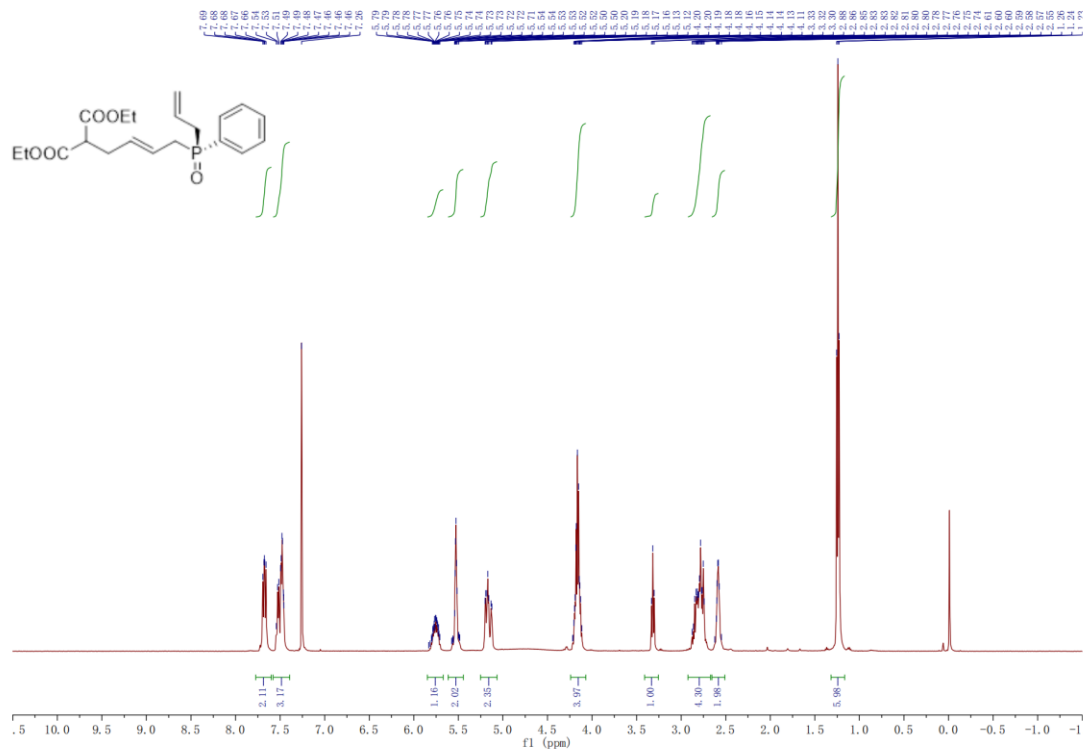

<sup>13</sup>C NMR spectra (126 MHz, CDCl<sub>3</sub>) of **3h**

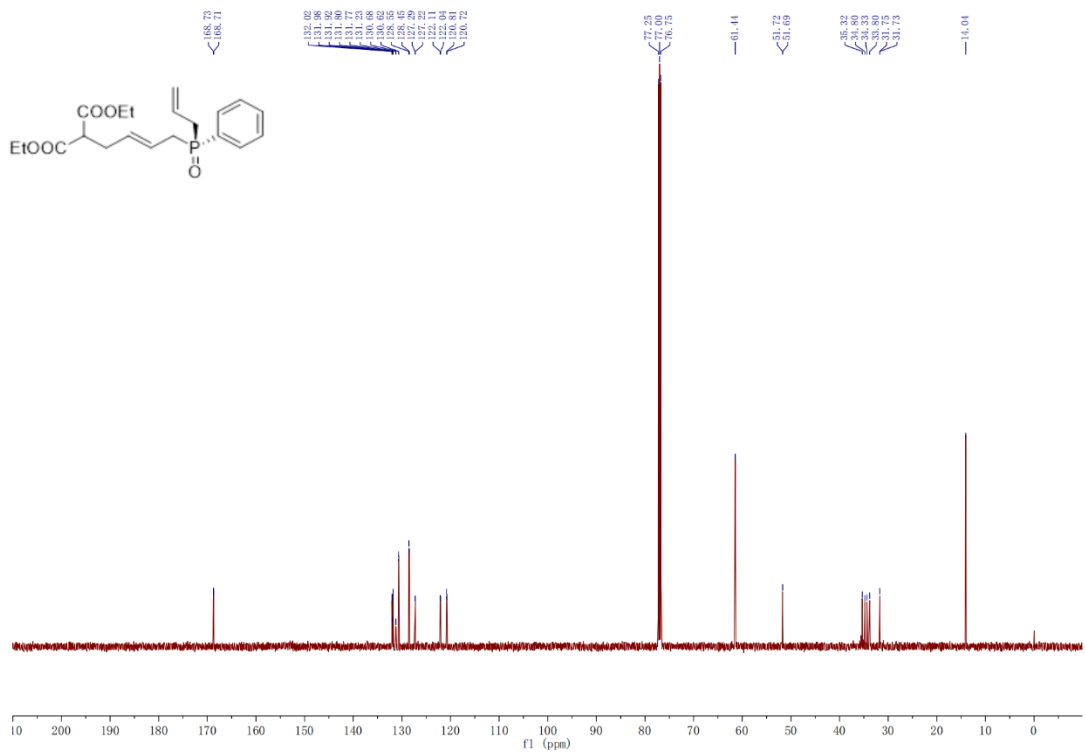

<sup>31</sup>P NMR spectra (202 MHz, CDCl<sub>3</sub>) of **3h**



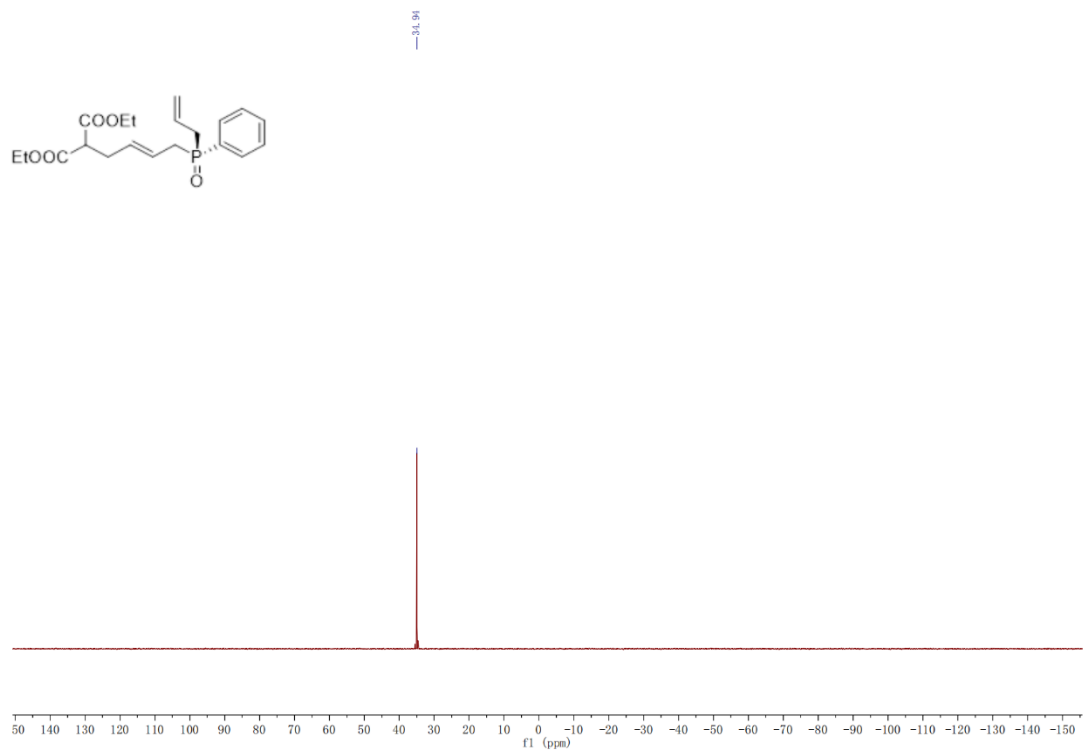

<sup>1</sup>H NMR spectra (500 MHz, CDCl<sub>3</sub>) of **3i**

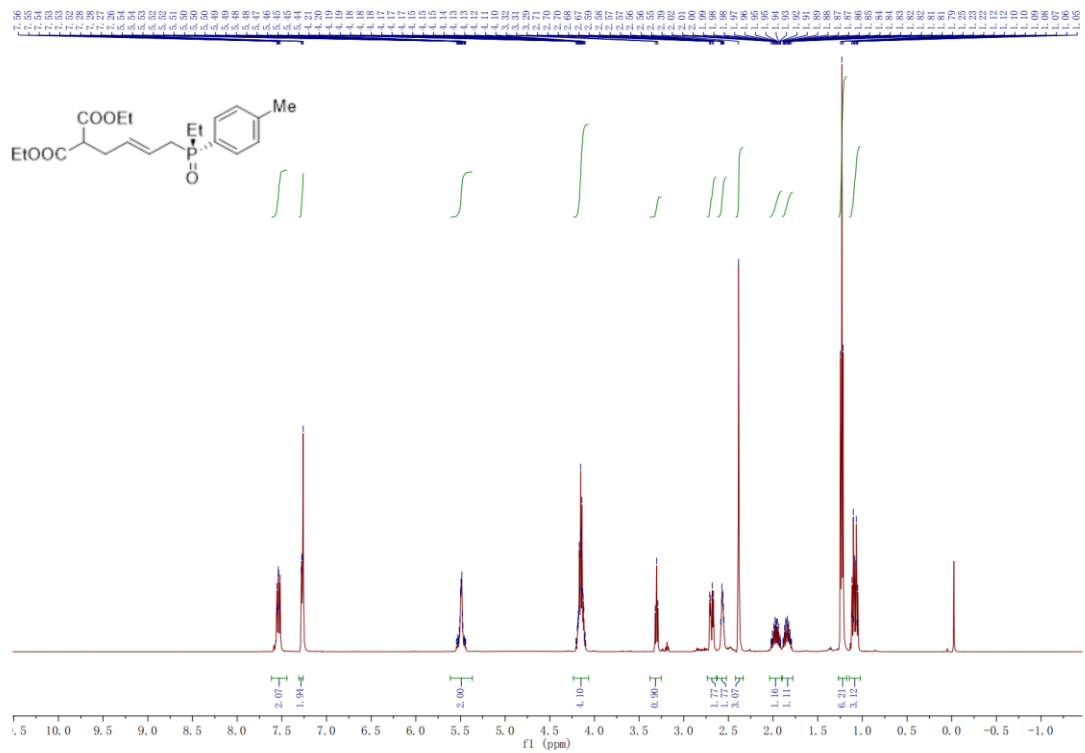

<sup>13</sup>C NMR spectra (126 MHz, CDCl<sub>3</sub>) of **3i**

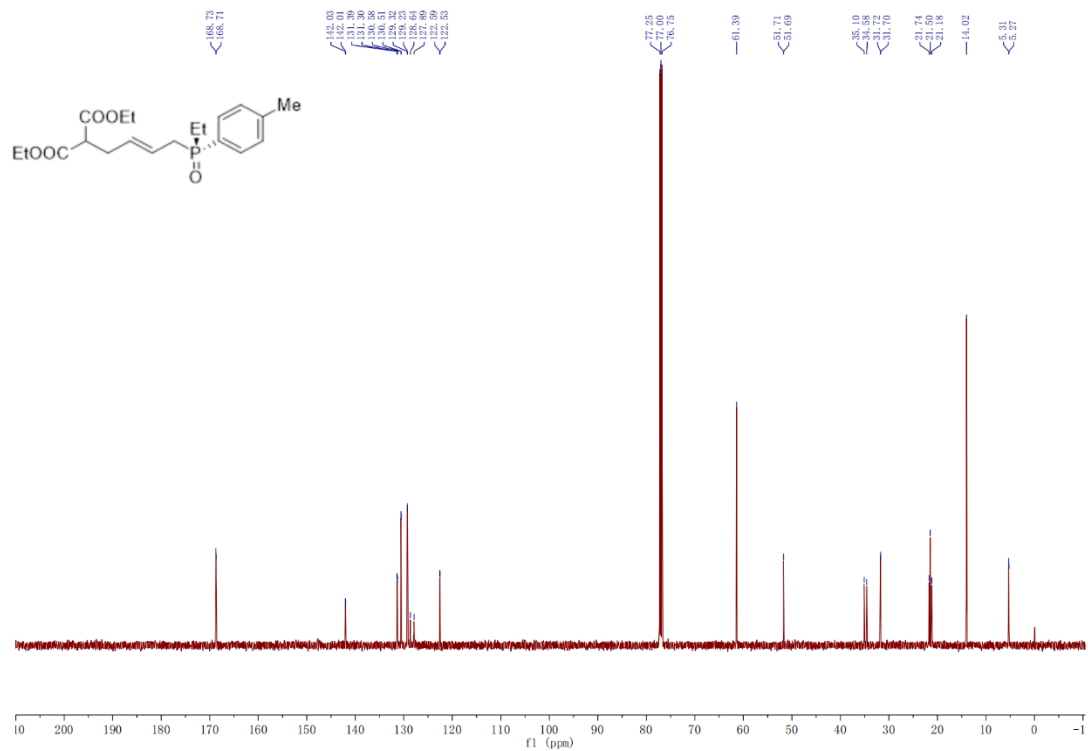

<sup>31</sup>P NMR spectra (202 MHz, CDCl<sub>3</sub>) of **3i**

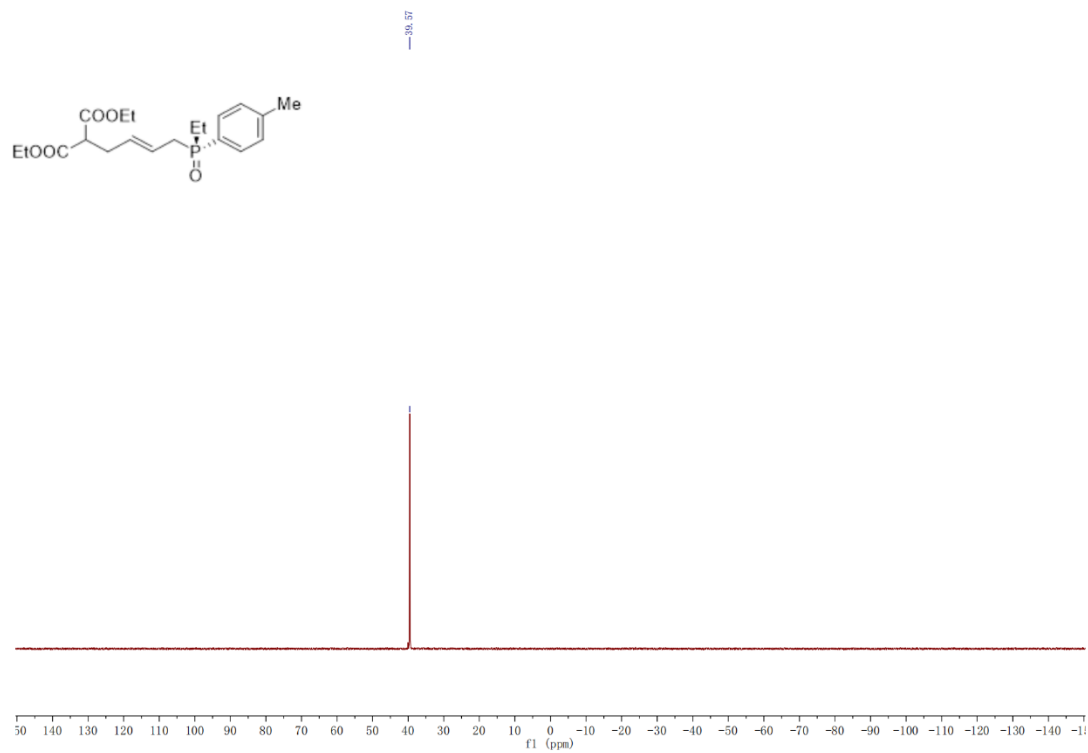

<sup>1</sup>H NMR spectra (500 MHz, CDCl<sub>3</sub>) of **3j**



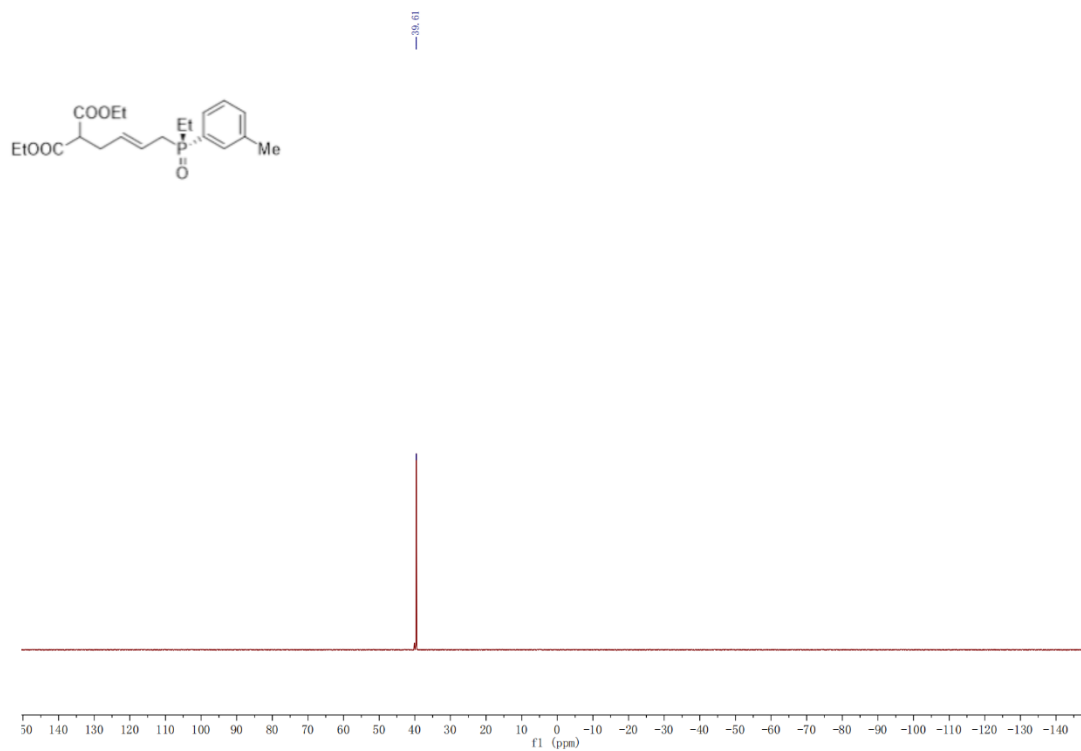

<sup>1</sup>H NMR spectra (500 MHz, CDCl<sub>3</sub>) of **3k**

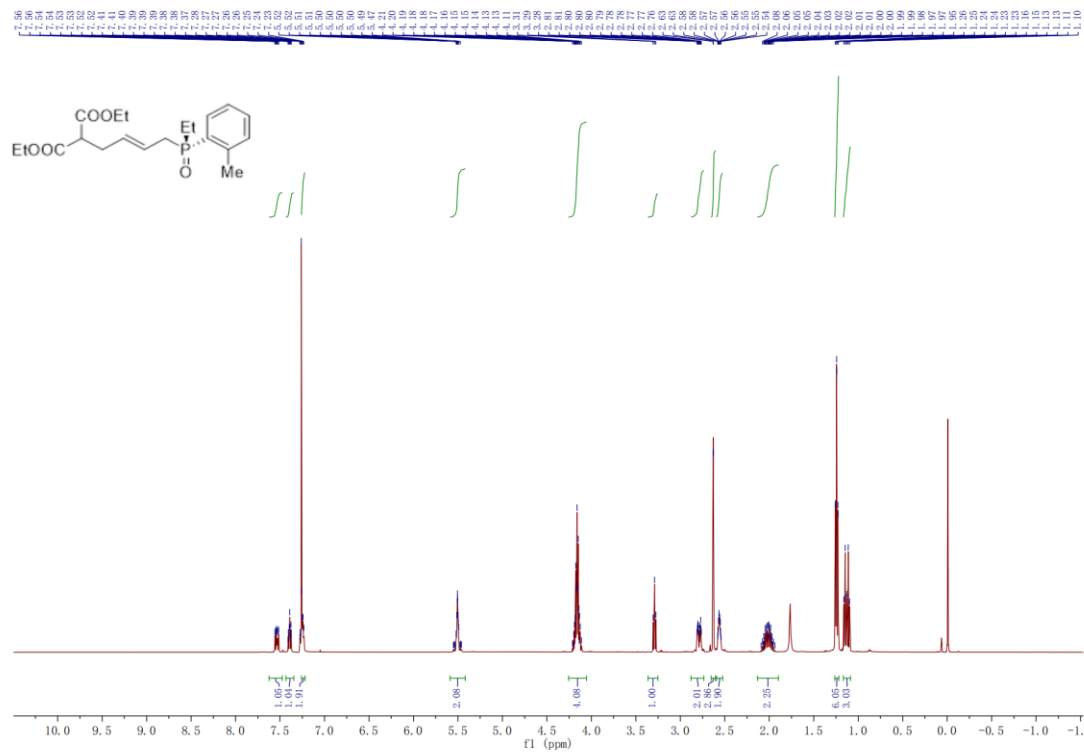

<sup>13</sup>C NMR spectra (126 MHz, CDCl<sub>3</sub>) of **3k**

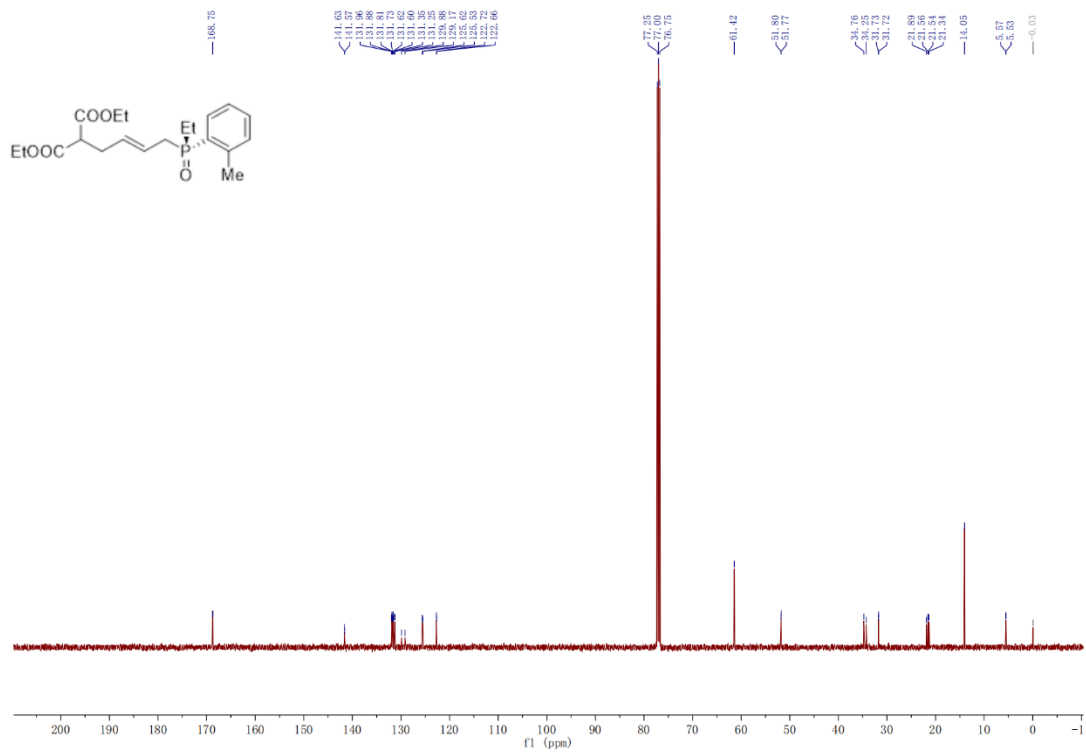

<sup>31</sup>P NMR spectra (202 MHz, CDCl<sub>3</sub>) of **3k**

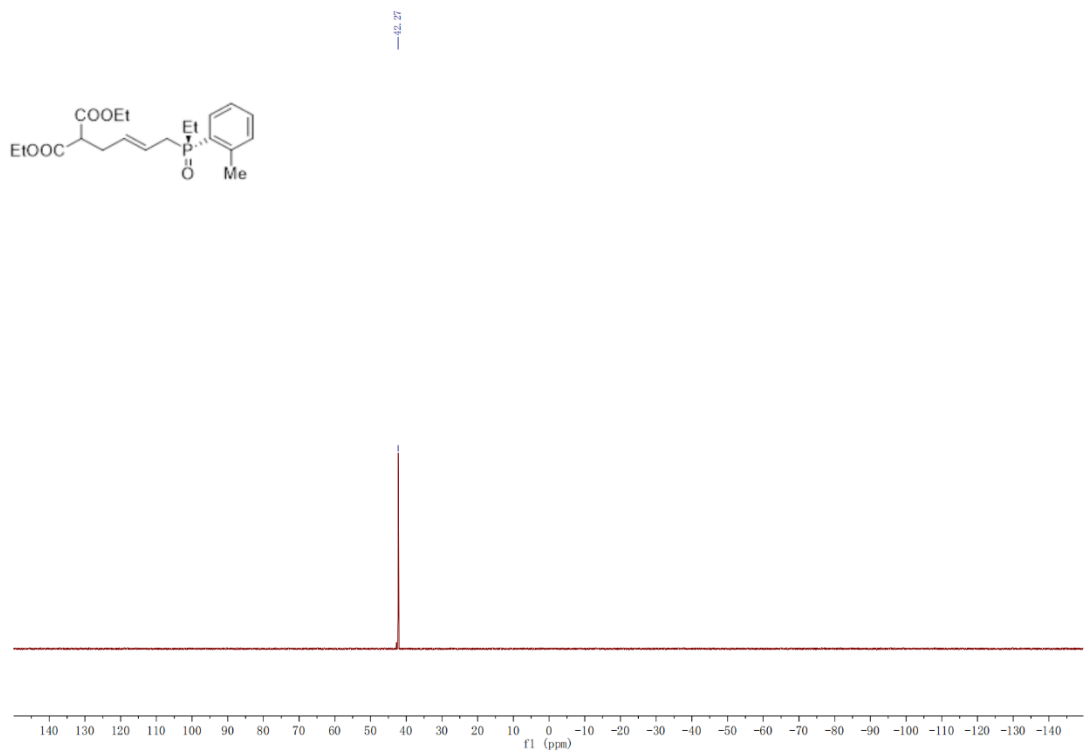

<sup>1</sup>H NMR spectra (500 MHz, CDCl<sub>3</sub>) of **3l**

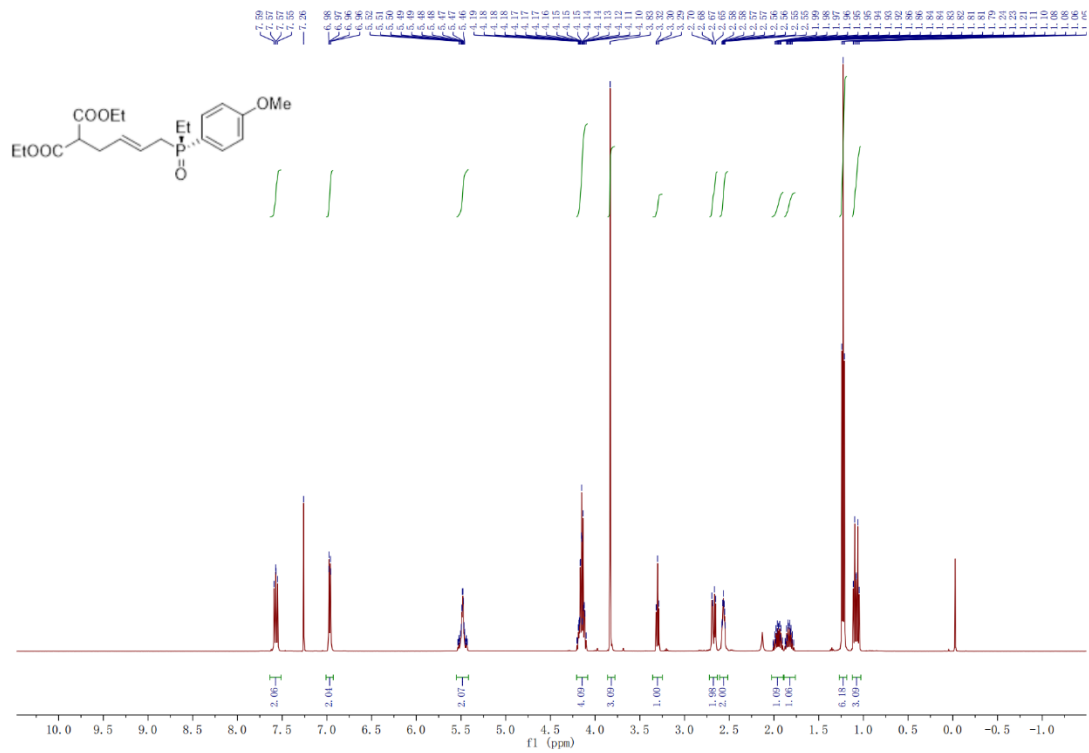

<sup>13</sup>C NMR spectra (126 MHz, CDCl<sub>3</sub>) of **31**

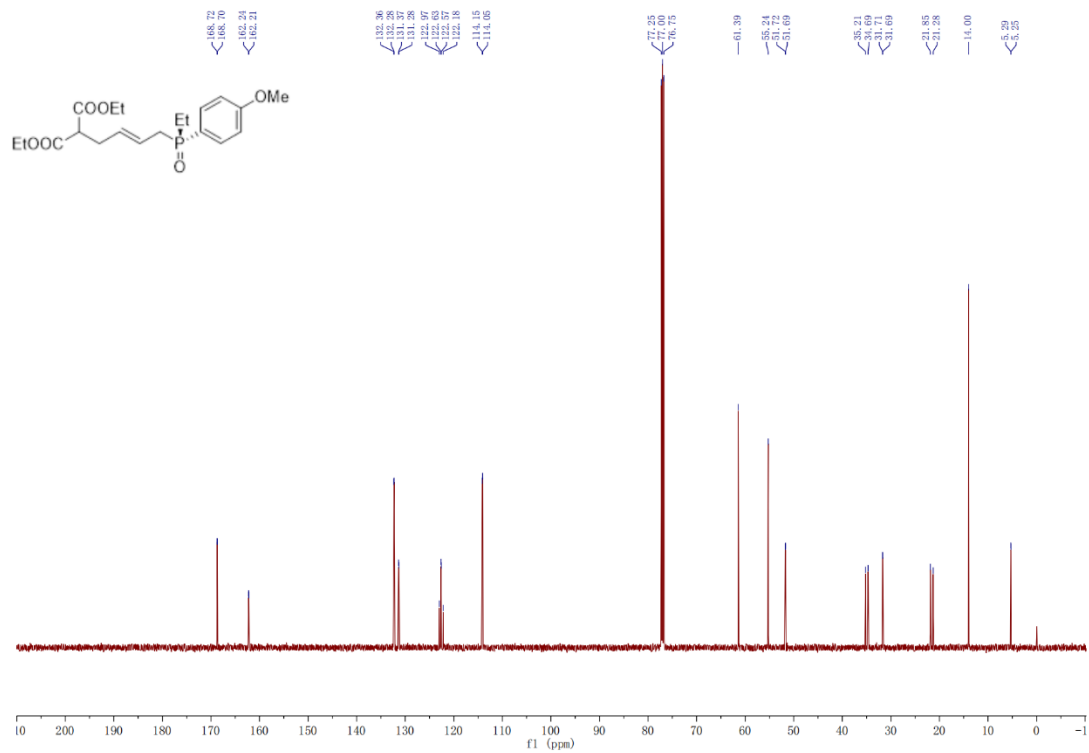

<sup>31</sup>P NMR spectra (202 MHz, CDCl<sub>3</sub>) of **31**

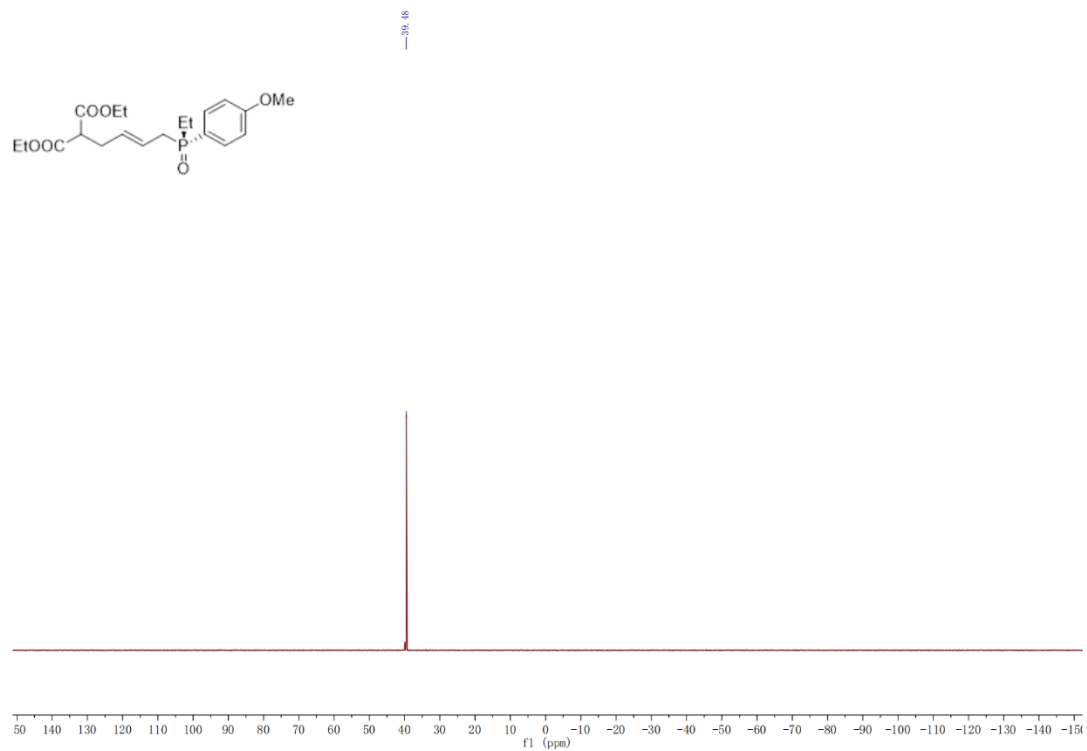

<sup>1</sup>H NMR spectra (500 MHz, CDCl<sub>3</sub>) of **3m**

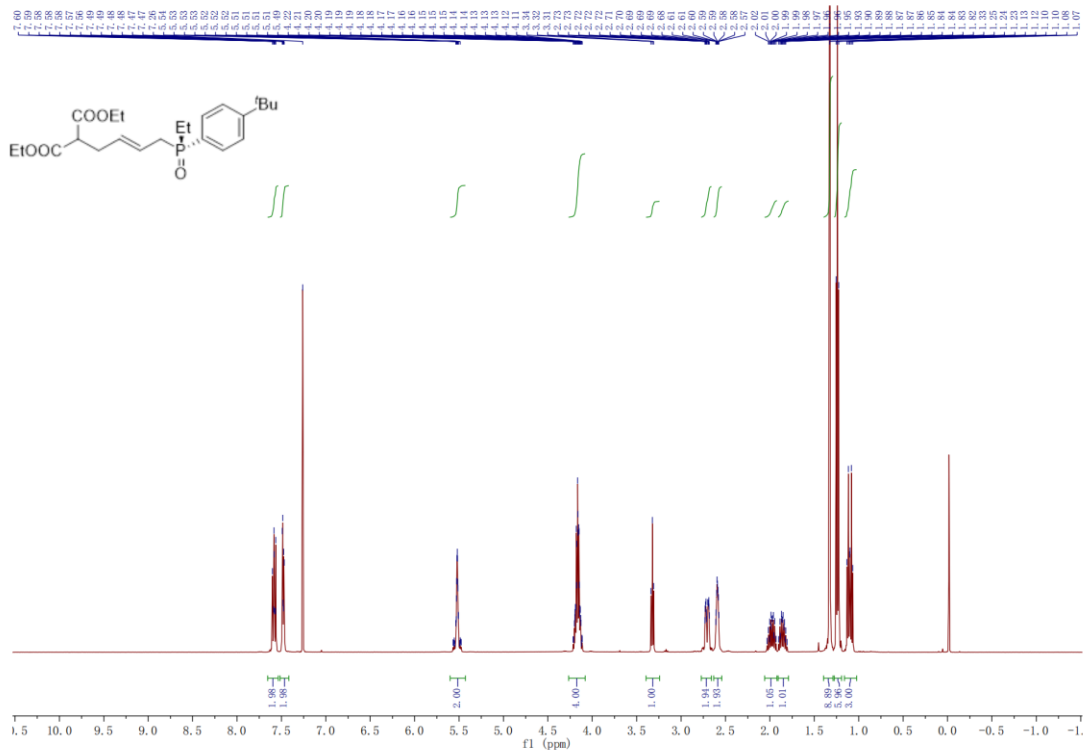

<sup>13</sup>C NMR spectra (126 MHz, CDCl<sub>3</sub>) of **3m**

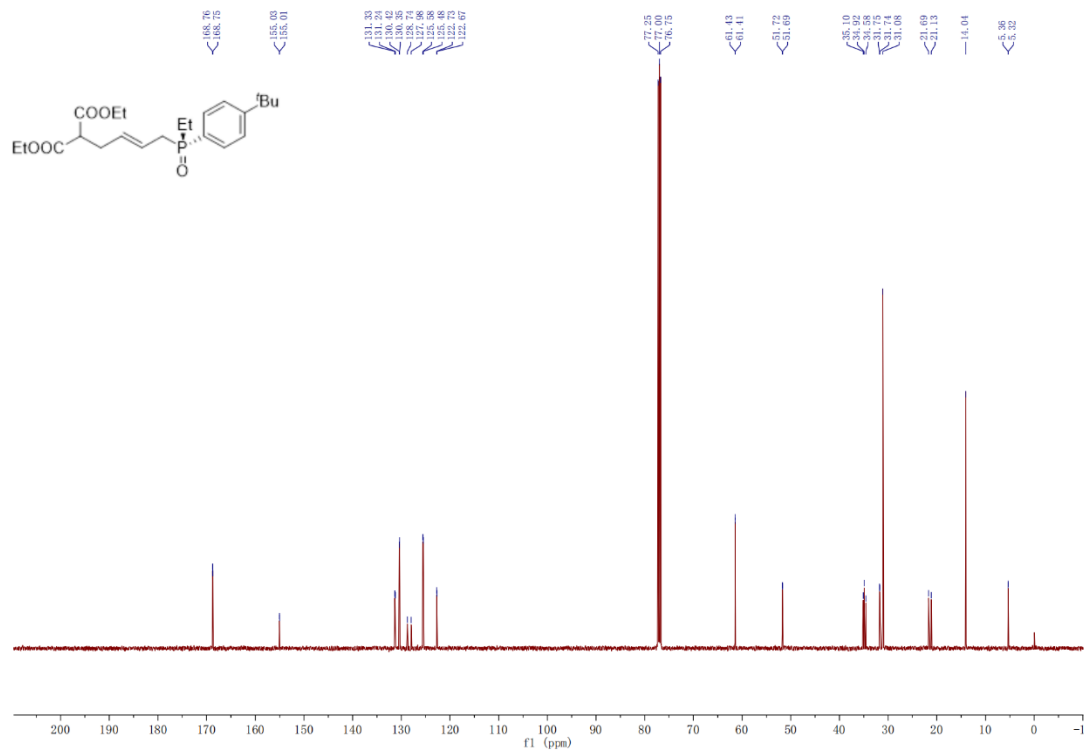

<sup>31</sup>P NMR spectra (202 MHz, CDCl<sub>3</sub>) of **3m**

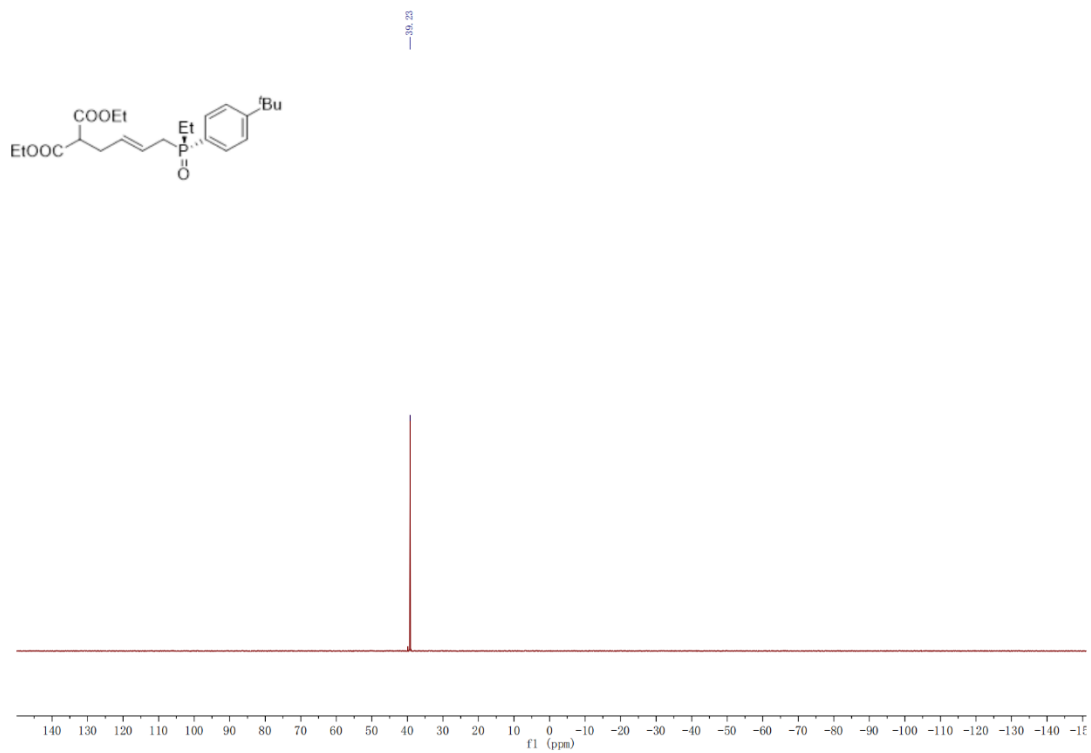

<sup>1</sup>H NMR spectra (500 MHz, CDCl<sub>3</sub>) of **3n**





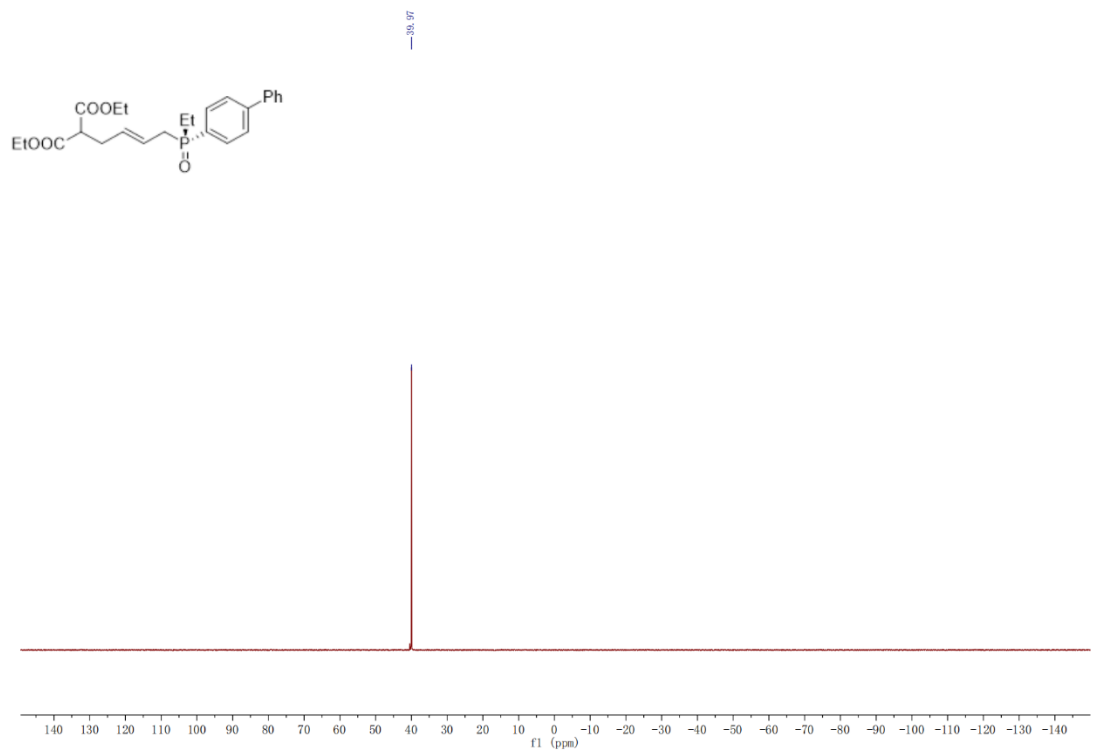

<sup>1</sup>H NMR spectra (500 MHz, CDCl<sub>3</sub>) of **3o**

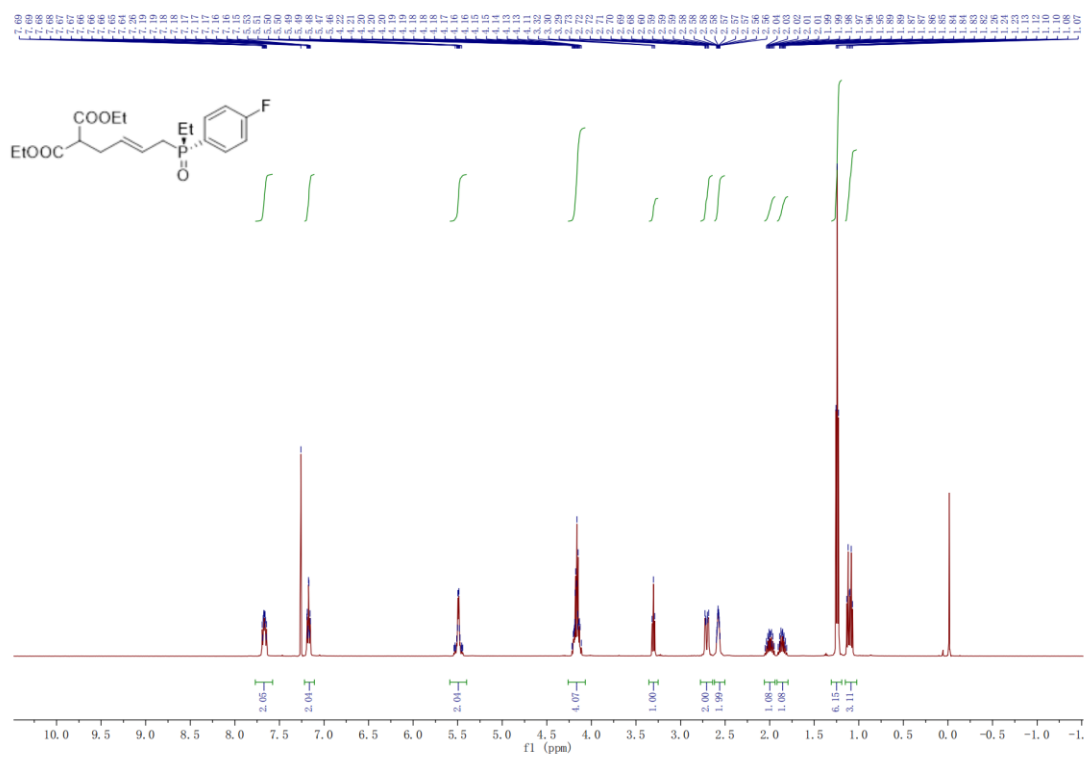

<sup>13</sup>C NMR spectra (126 MHz, CDCl<sub>3</sub>) of **3o**

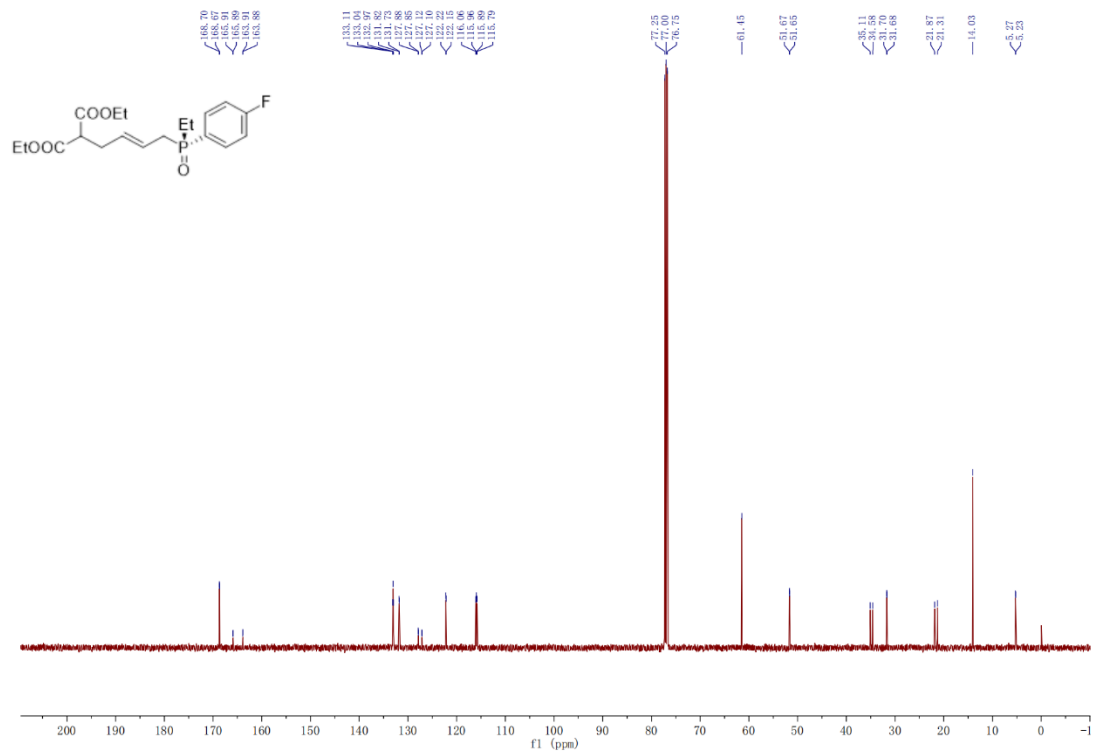

<sup>31</sup>P NMR spectra (202 MHz, CDCl<sub>3</sub>) of **30**

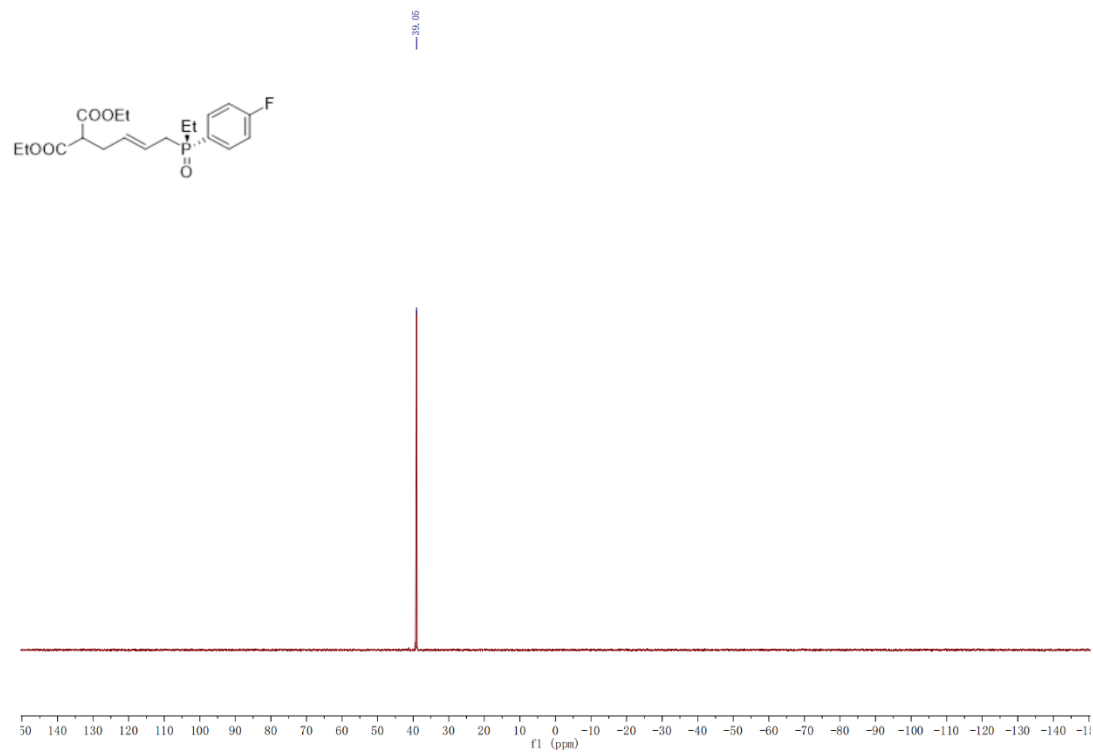

<sup>19</sup>F NMR spectra (471 MHz, CDCl<sub>3</sub>) of **30**



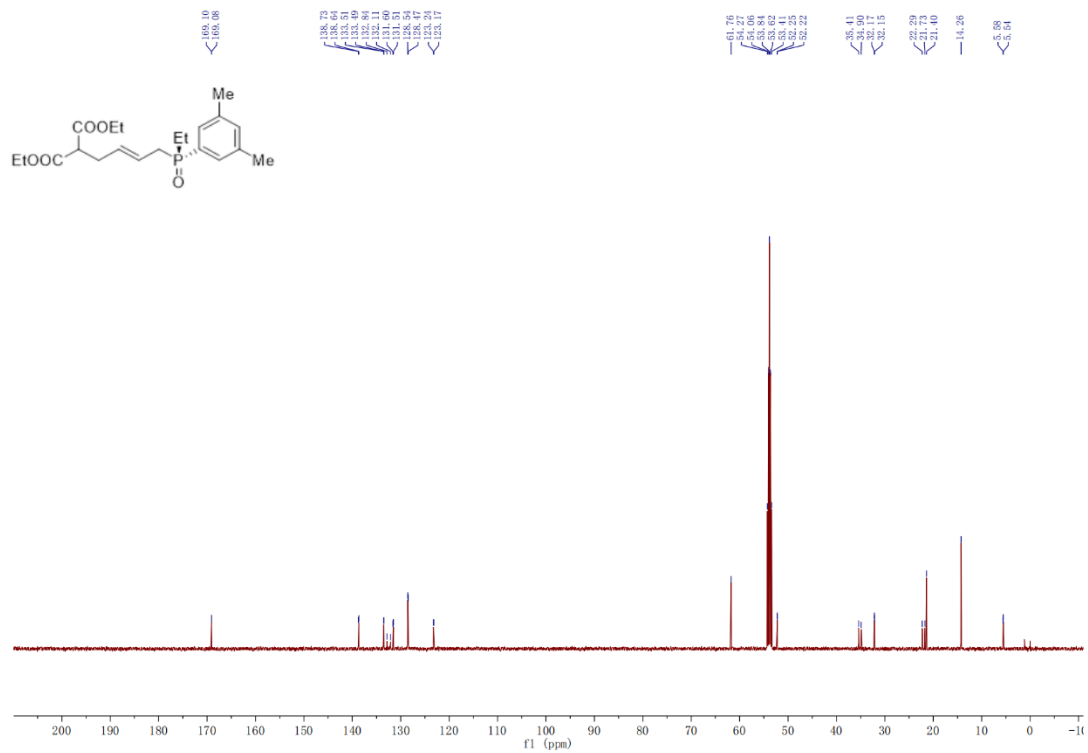

$^{31}\text{P}$  NMR spectra (202 MHz,  $\text{CD}_2\text{Cl}_2$ ) of **3p**

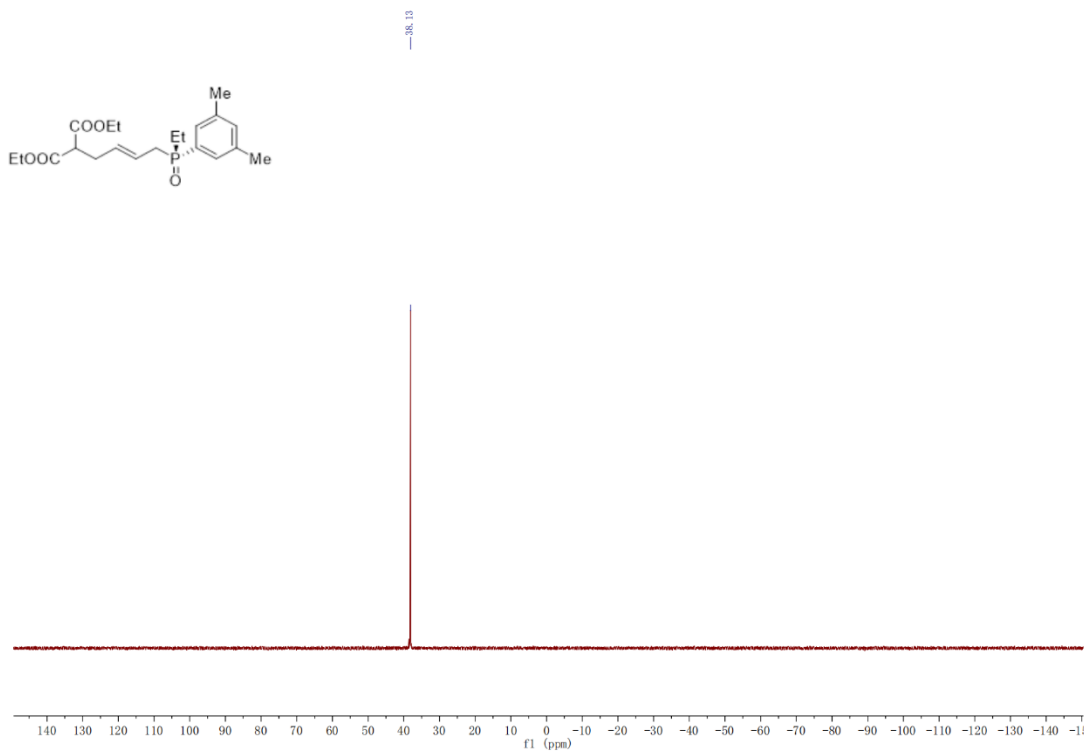

$^1\text{H}$  NMR spectra (500 MHz,  $\text{CDCl}_3$ ) of **3q**



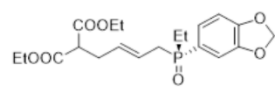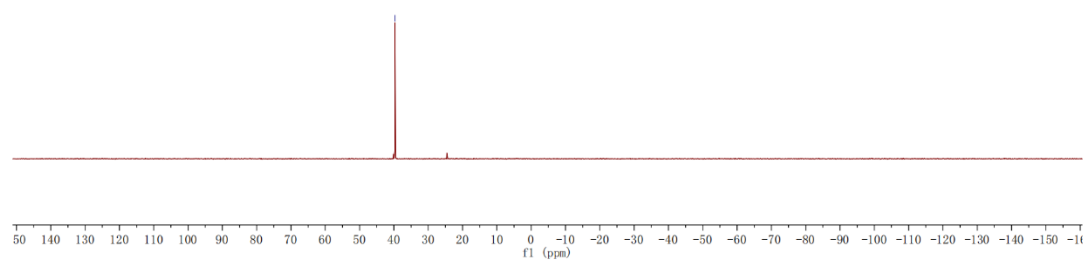

<sup>1</sup>H NMR spectra (500 MHz, CDCl<sub>3</sub>) of **3r**

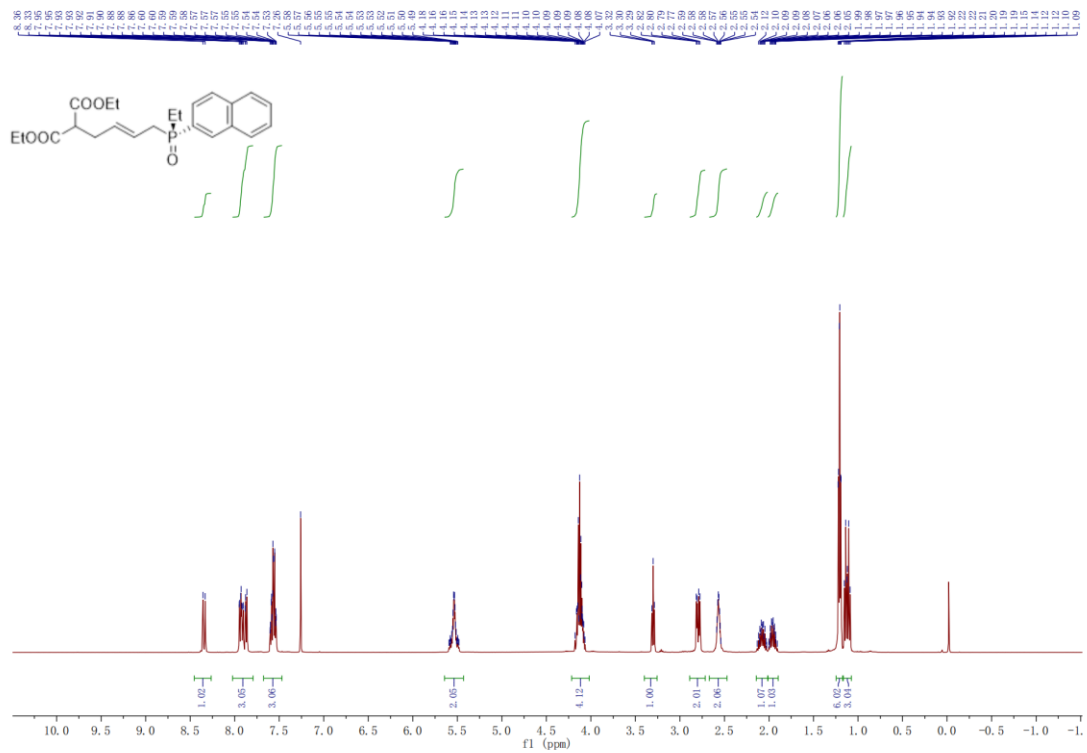

<sup>13</sup>C NMR spectra (126 MHz, CDCl<sub>3</sub>) of **3r**

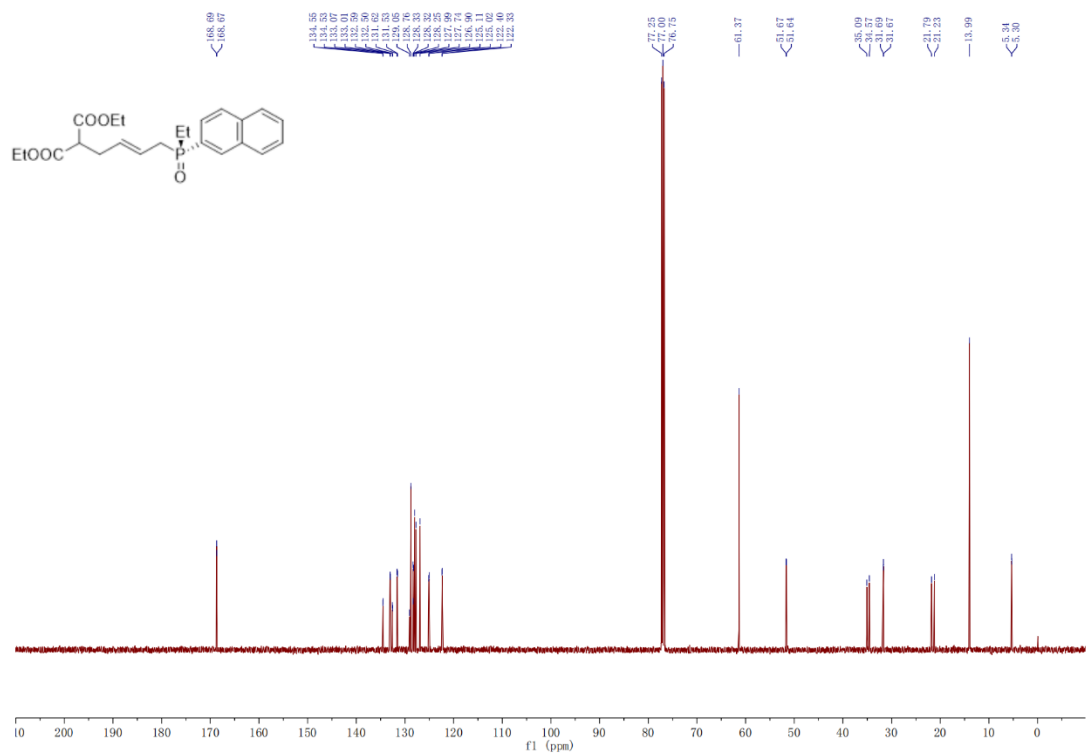

<sup>31</sup>P NMR spectra (202 MHz, CDCl<sub>3</sub>) of **3r**

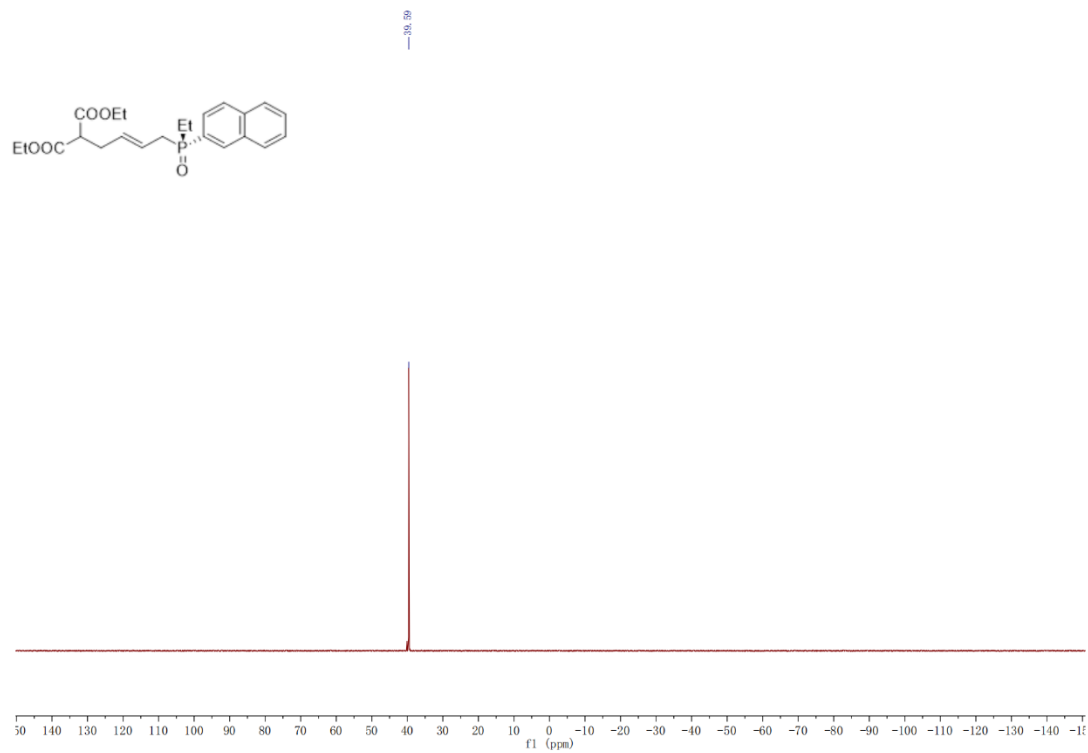

<sup>1</sup>H NMR spectra (500 MHz, CDCl<sub>3</sub>) of **3s**



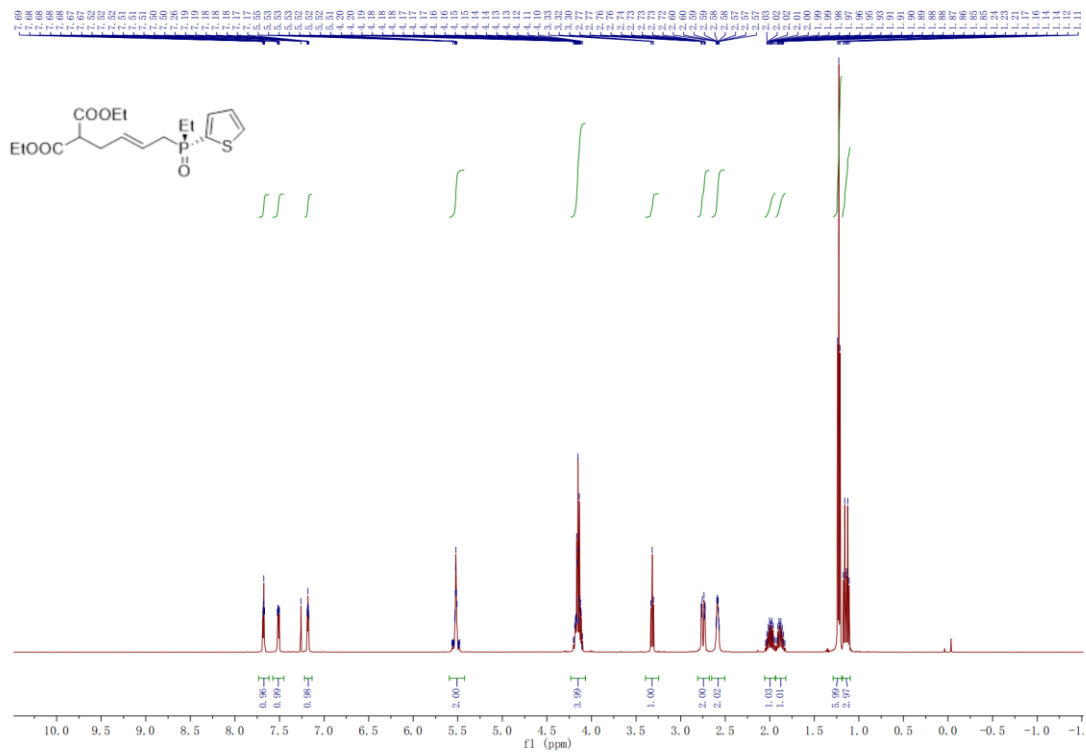

**<sup>13</sup>C NMR spectra (126 MHz, CDCl<sub>3</sub>) of 3s**

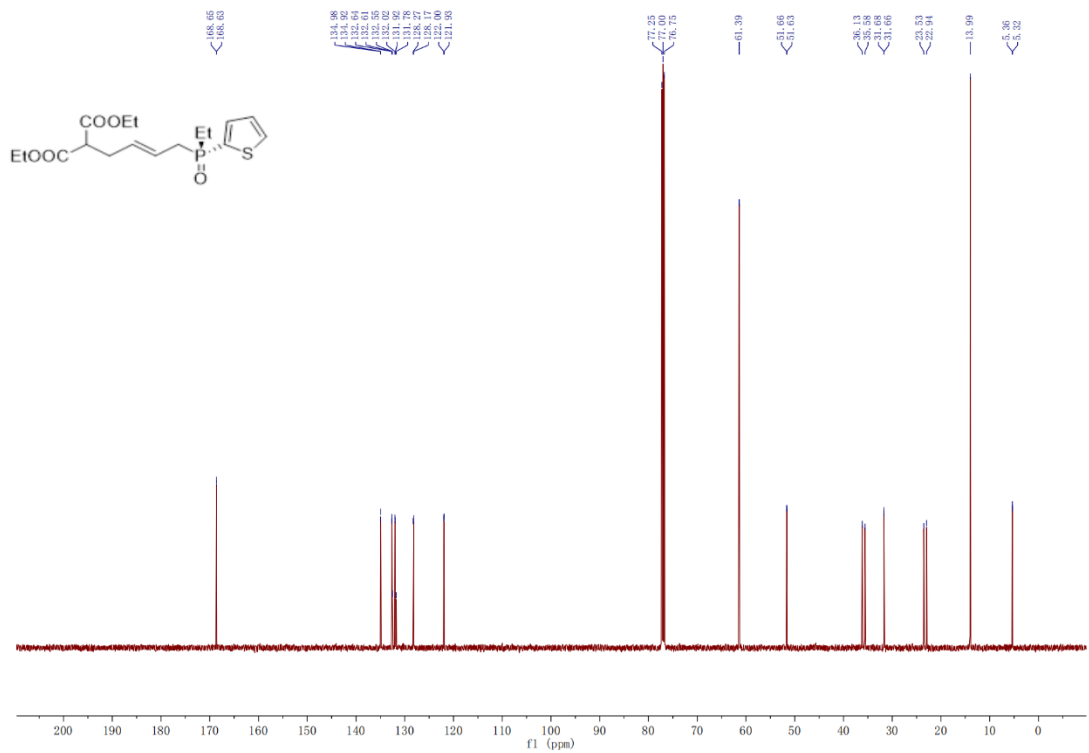

**<sup>31</sup>P NMR spectra (202 MHz, CDCl<sub>3</sub>) of 3s**

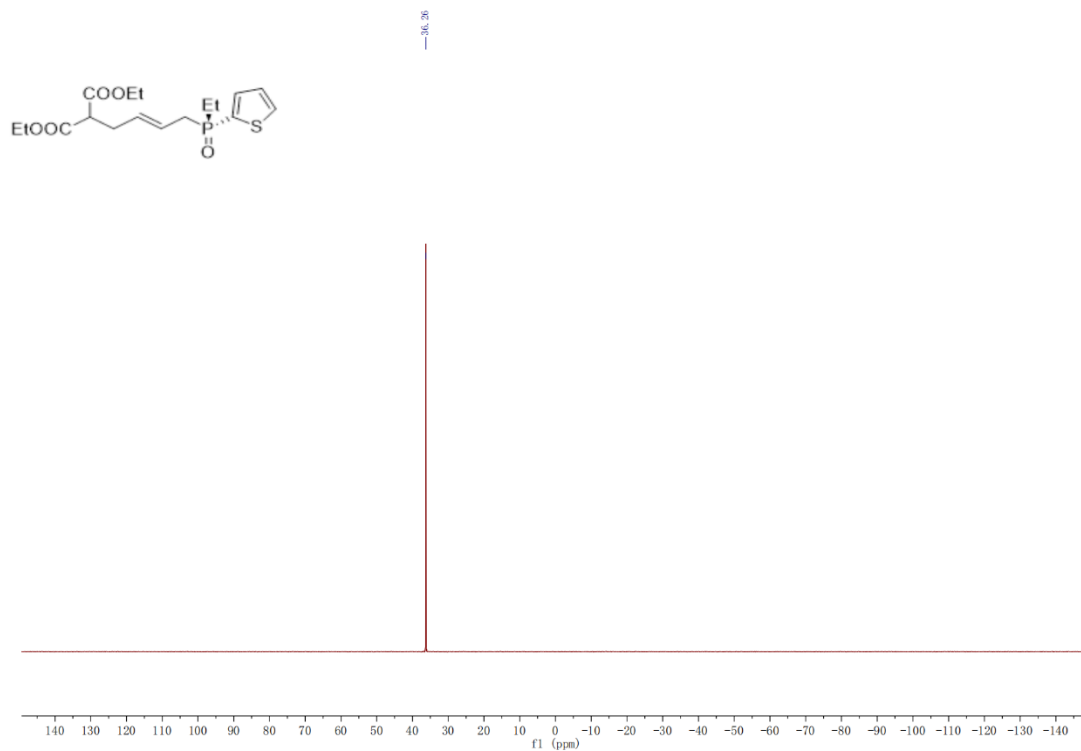

<sup>1</sup>H NMR spectra (500 MHz, CDCl<sub>3</sub>) of **3t**

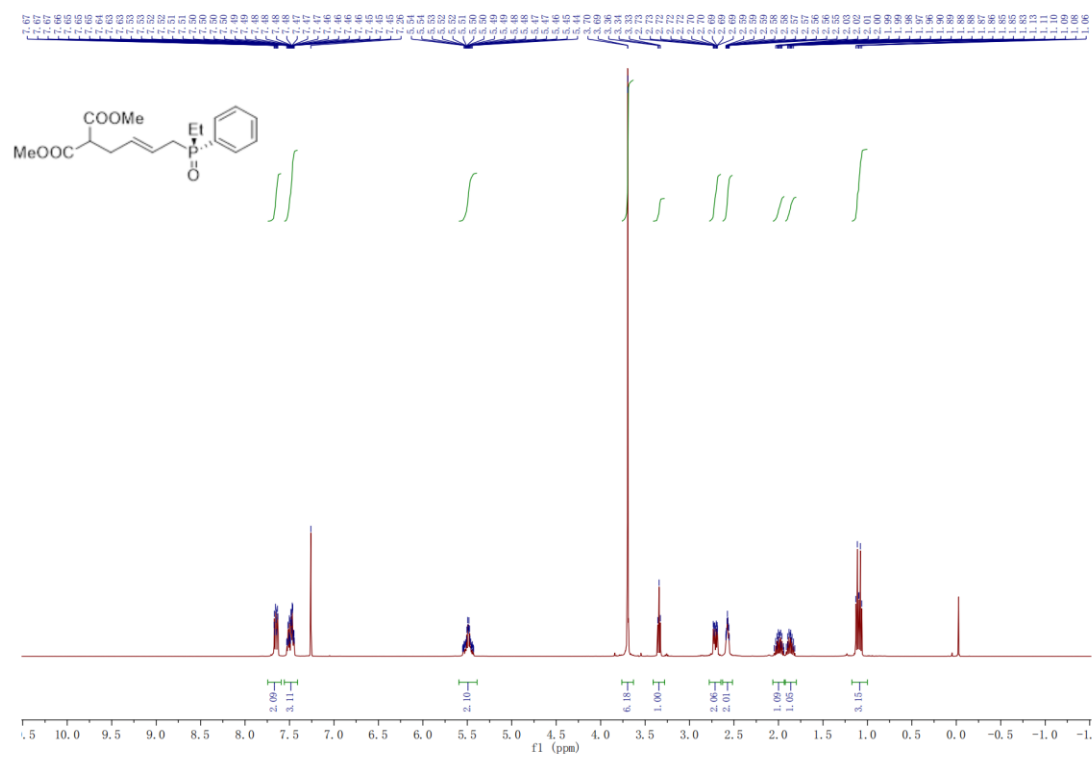

<sup>13</sup>C NMR spectra (126 MHz, CDCl<sub>3</sub>) of **3t**

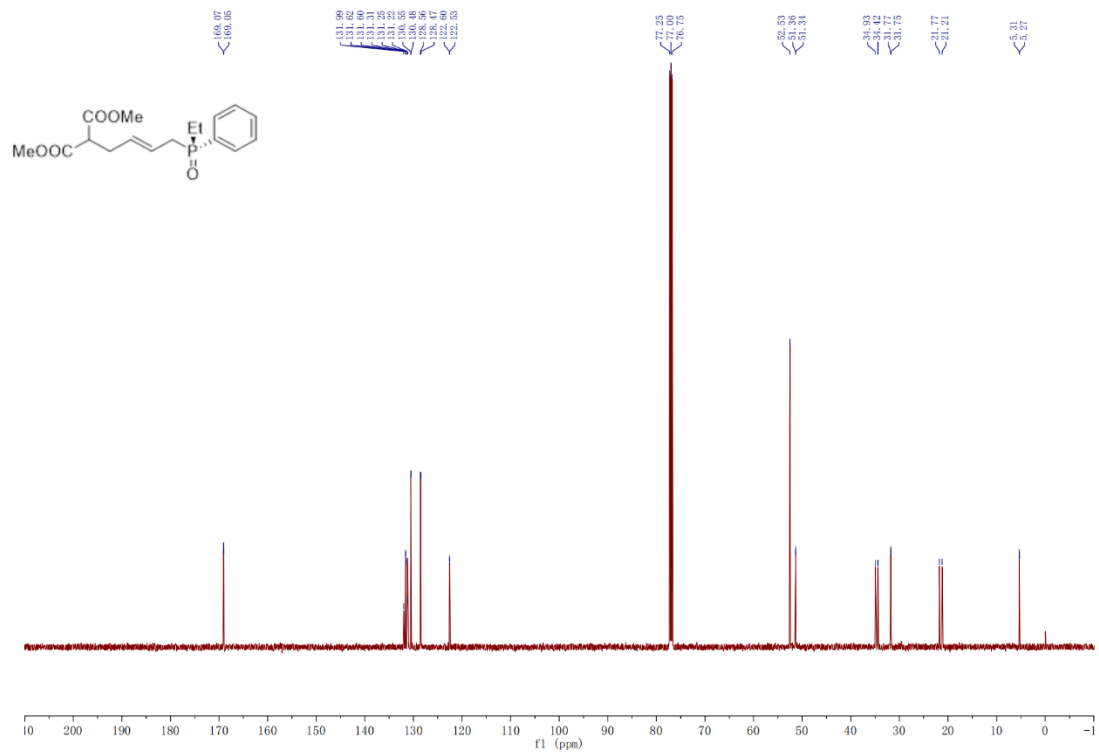

<sup>31</sup>P NMR spectra (202 MHz, CDCl<sub>3</sub>) of **3t**

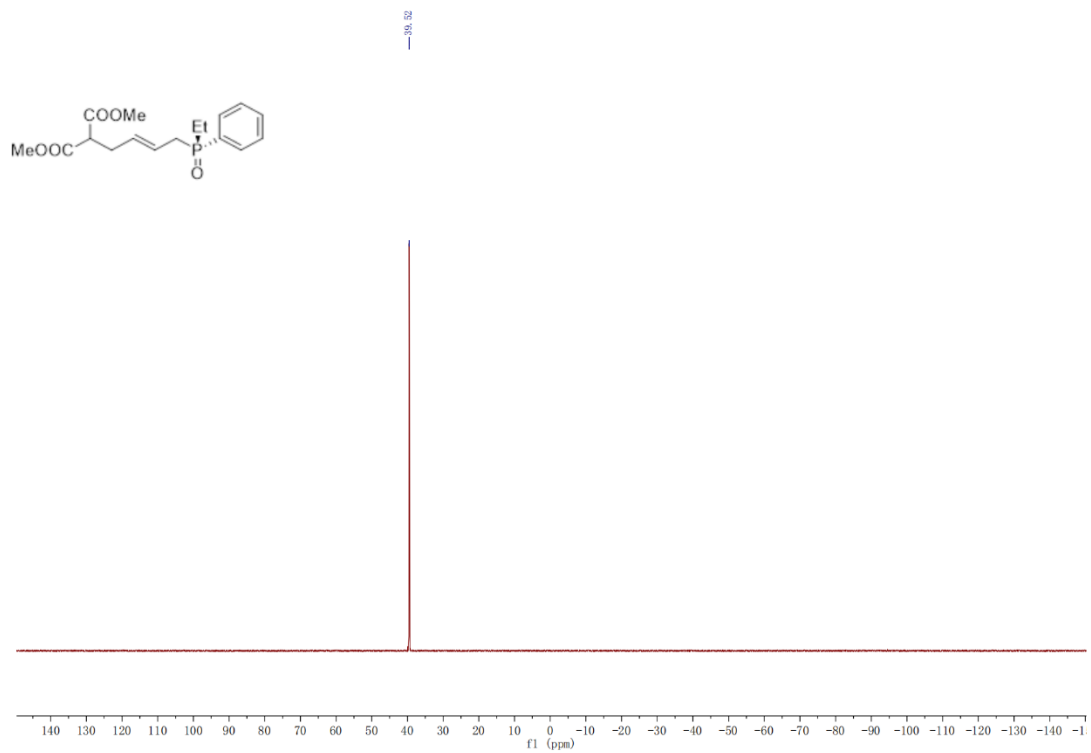

<sup>1</sup>H NMR spectra (500 MHz, CDCl<sub>3</sub>) of **3u**

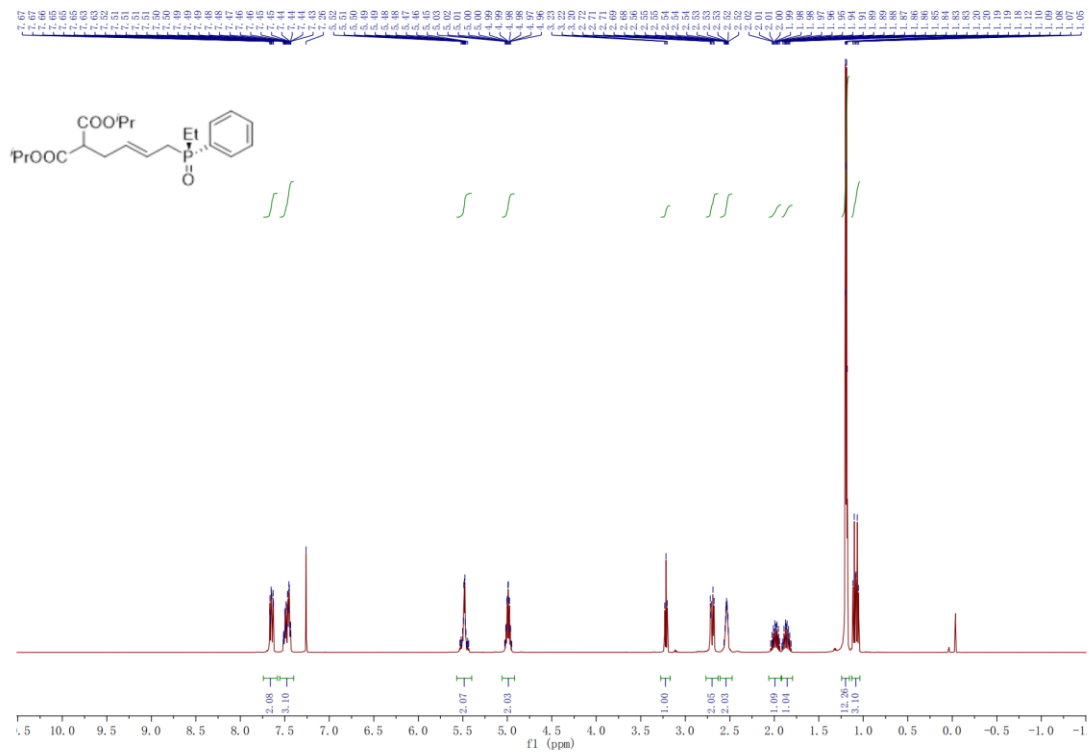

<sup>13</sup>C NMR spectra (126 MHz, CDCl<sub>3</sub>) of **3u**

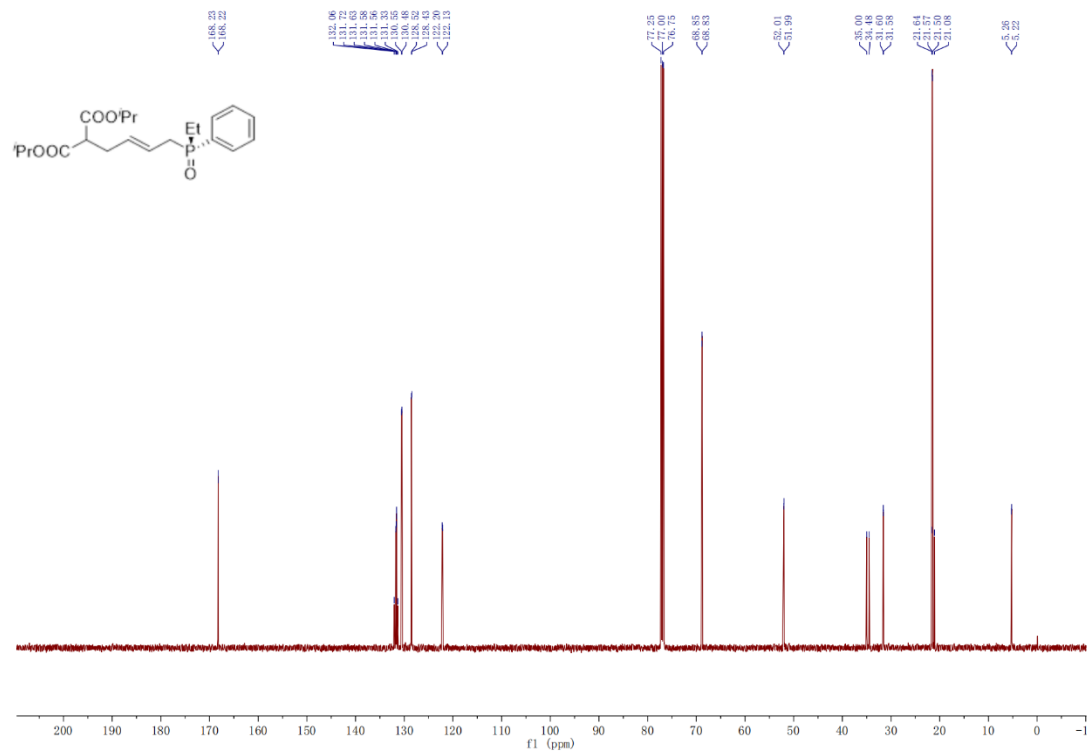

<sup>31</sup>P NMR spectra (202 MHz, CDCl<sub>3</sub>) of **3u**

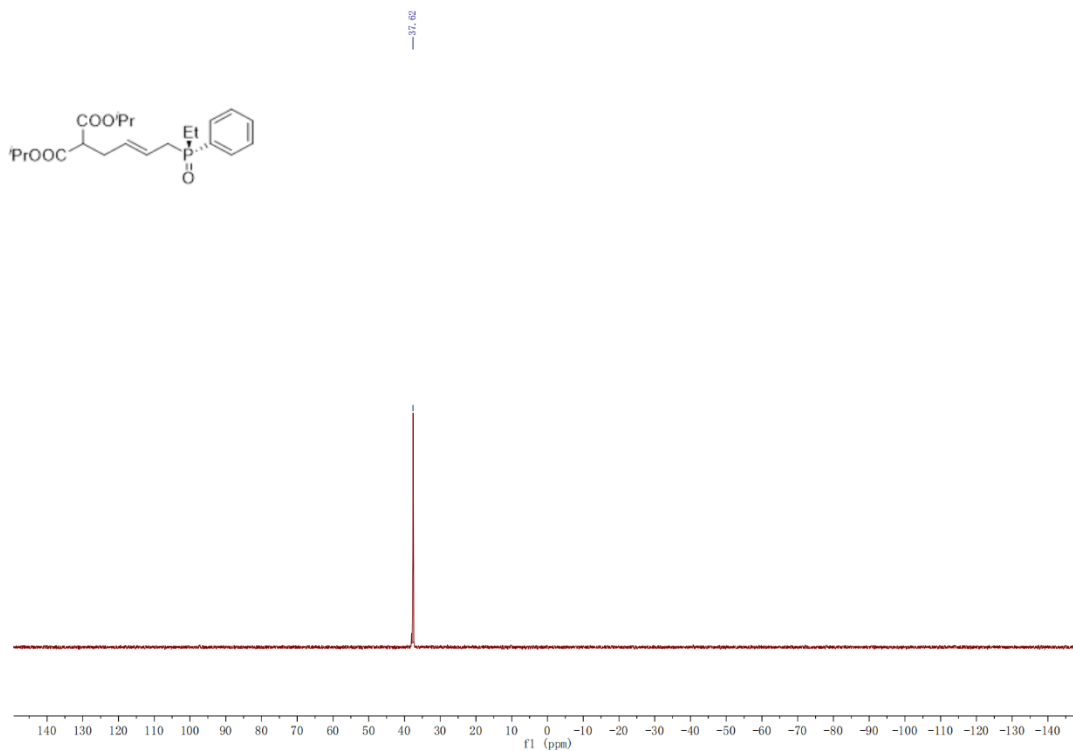

<sup>1</sup>H NMR spectra (500 MHz, CD<sub>2</sub>Cl<sub>2</sub>) of **3v**

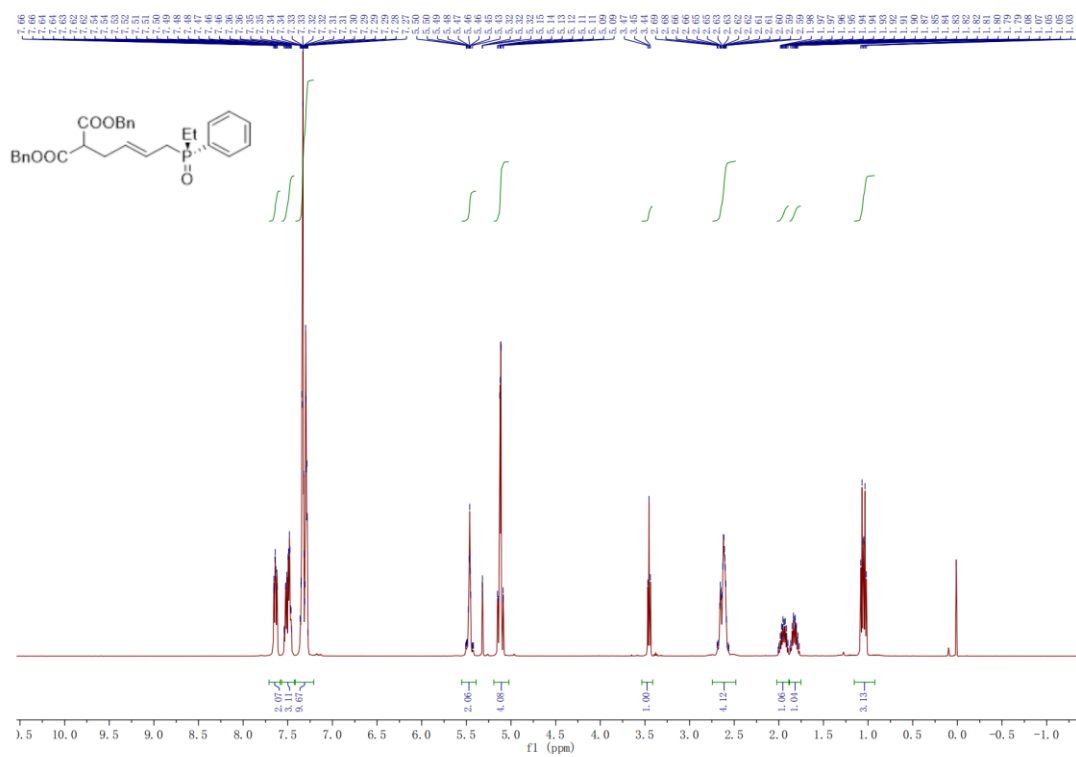

<sup>13</sup>C NMR spectra (126 MHz, CD<sub>2</sub>Cl<sub>2</sub>) of **3v**

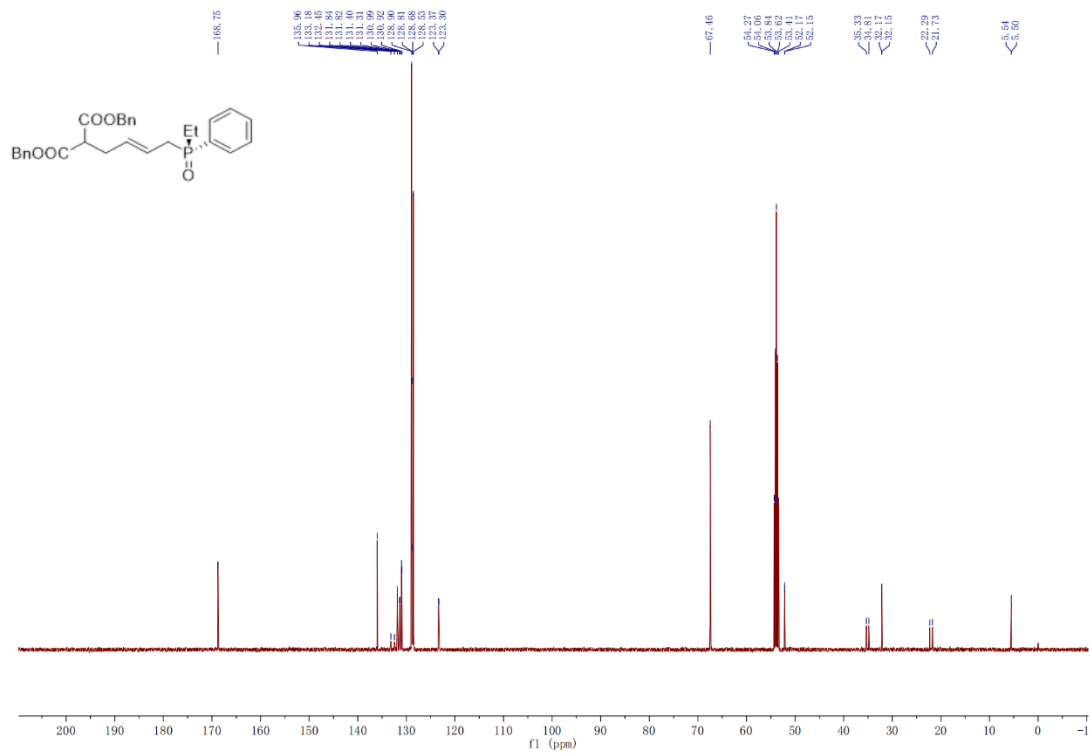

$^{31}\text{P}$  NMR spectra (202 MHz,  $\text{CD}_2\text{Cl}_2$ ) of **3v**

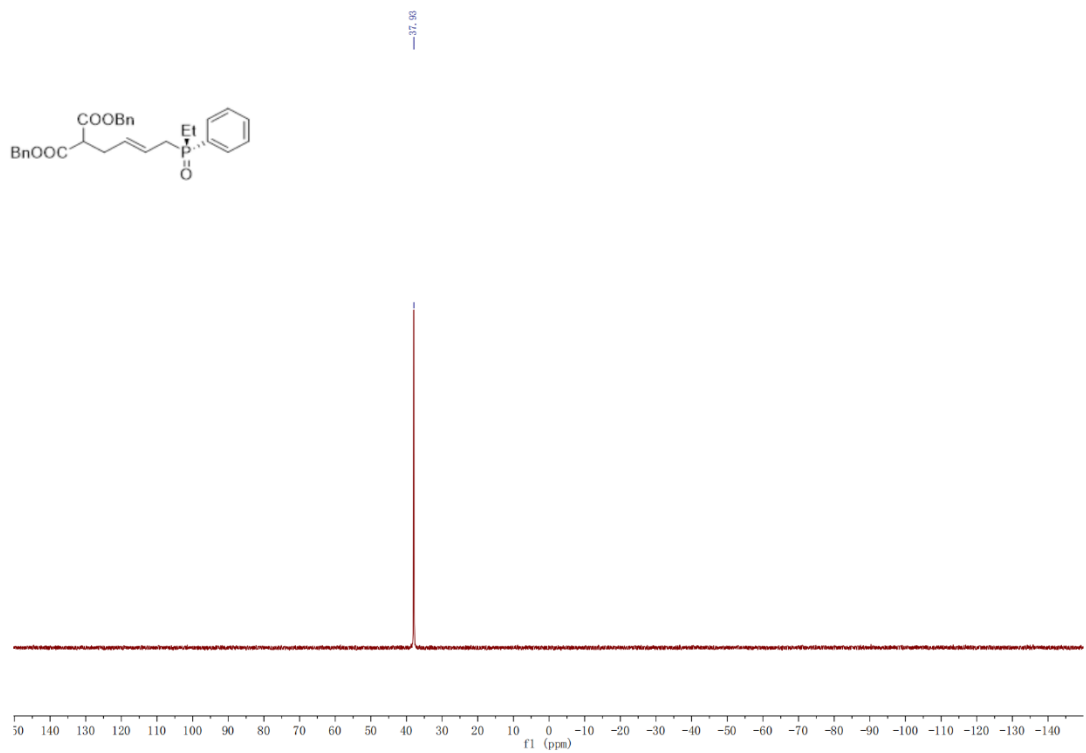

$^1\text{H}$  NMR spectra (500 MHz,  $\text{CDCl}_3$ ) of **3w**

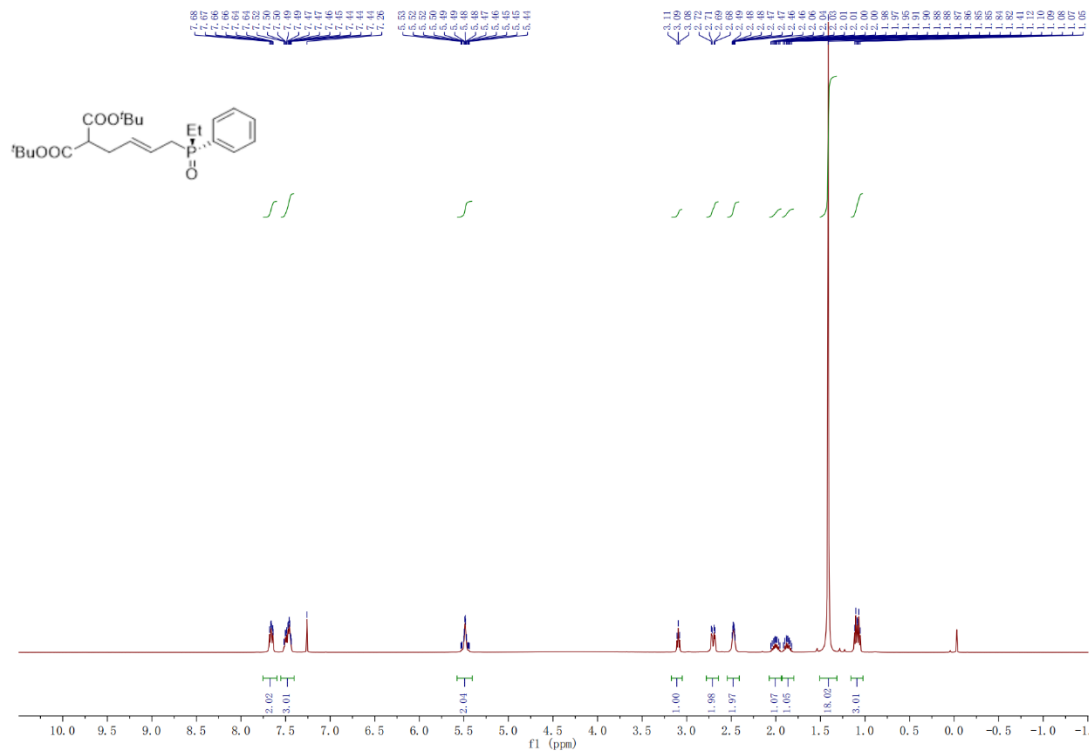

<sup>13</sup>C NMR spectra (126 MHz, CDCl<sub>3</sub>) of **3w**

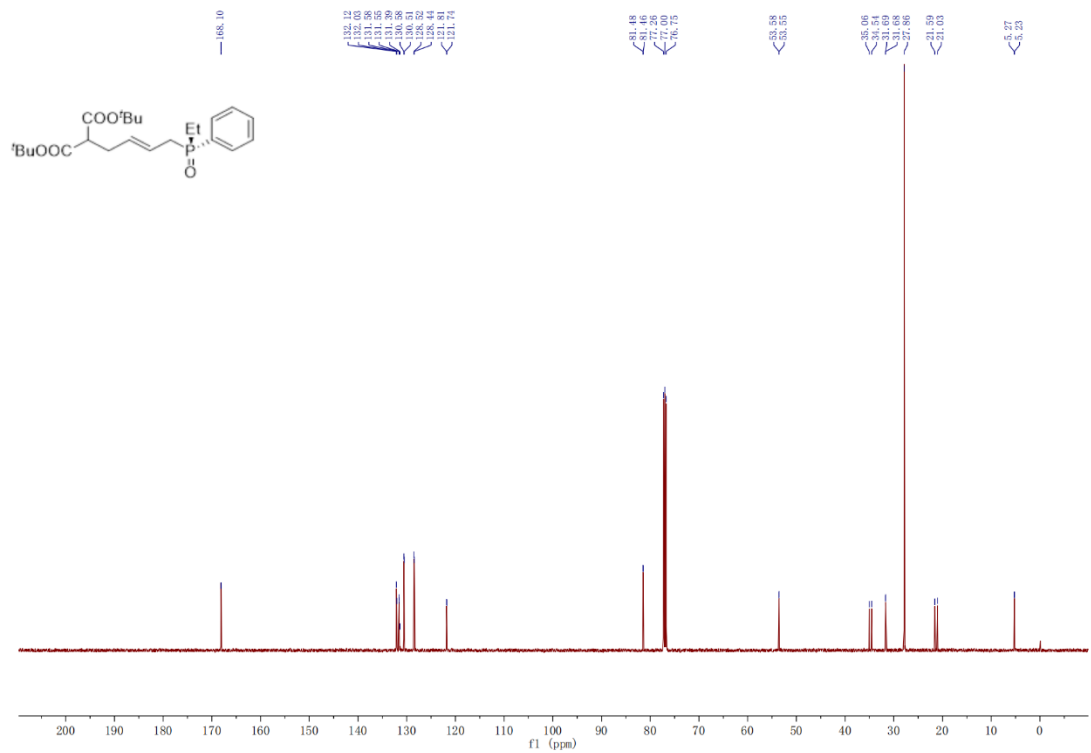

<sup>31</sup>P NMR spectra (202 MHz, CDCl<sub>3</sub>) of **3w**

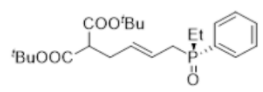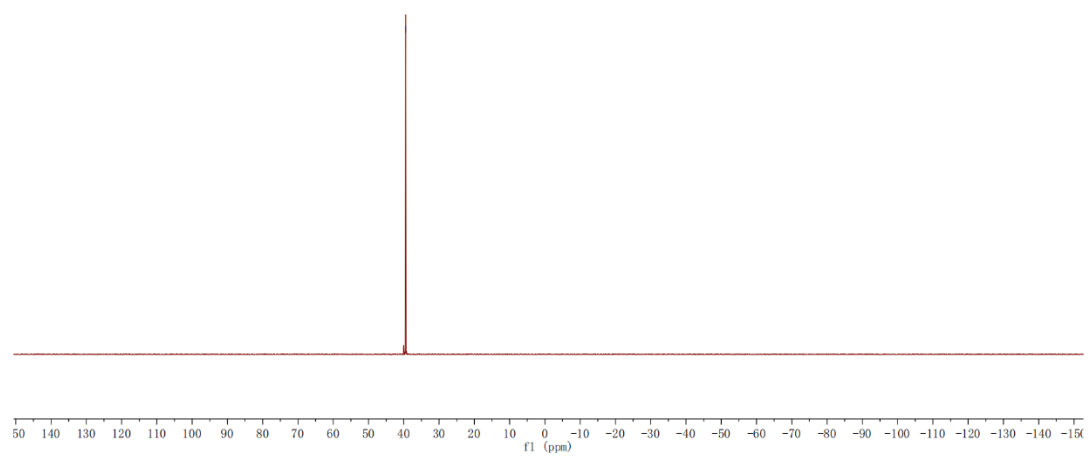

<sup>1</sup>H NMR spectra (500 MHz, CDCl<sub>3</sub>) of **4a**

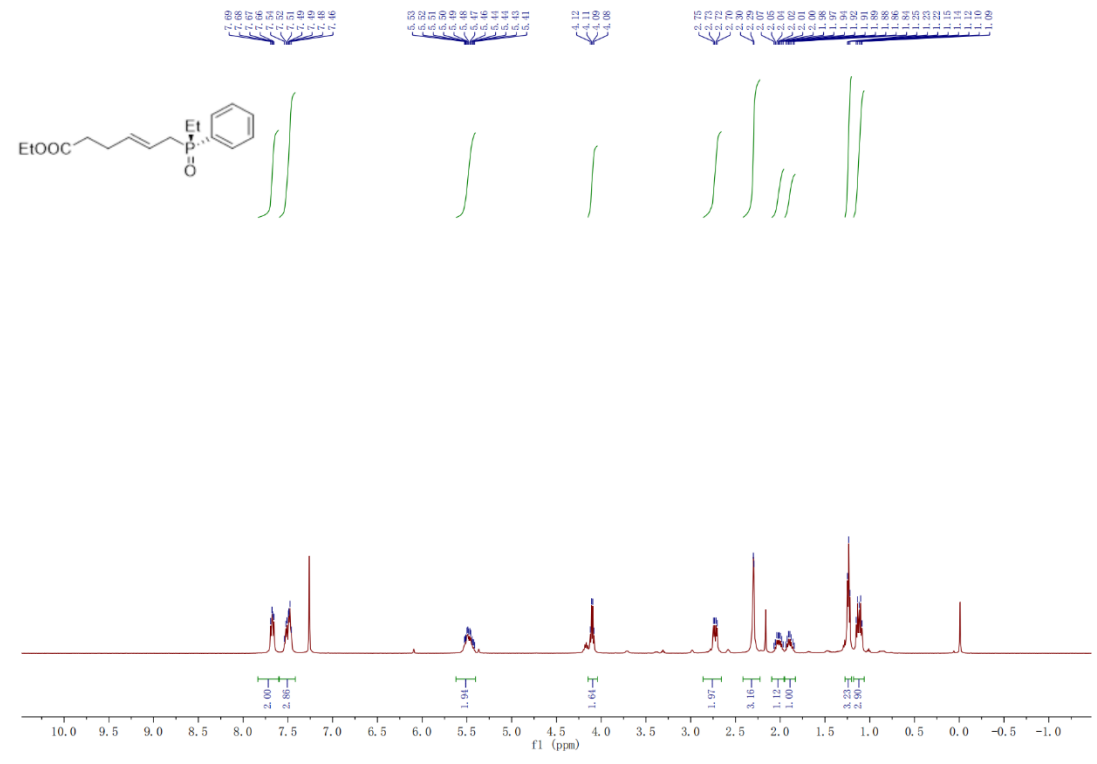

<sup>13</sup>C NMR spectra (126 MHz, CDCl<sub>3</sub>) of **4a**



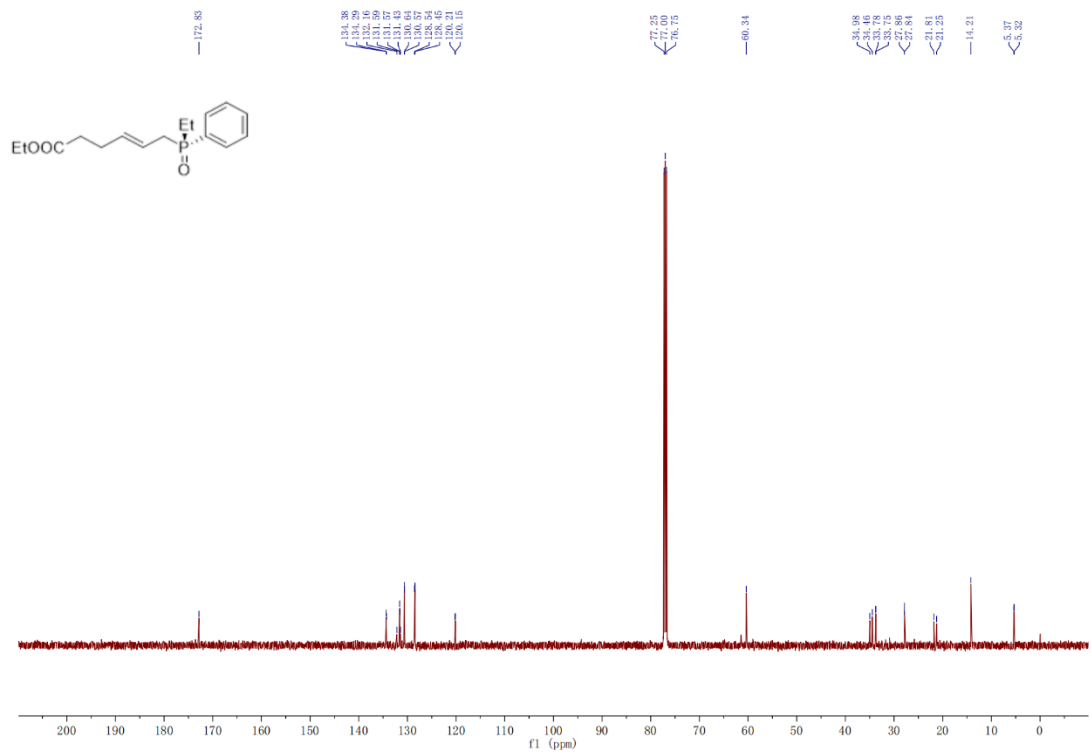

$^{31}\text{P}$  NMR spectra (202 MHz,  $\text{CDCl}_3$ ) of **4a**

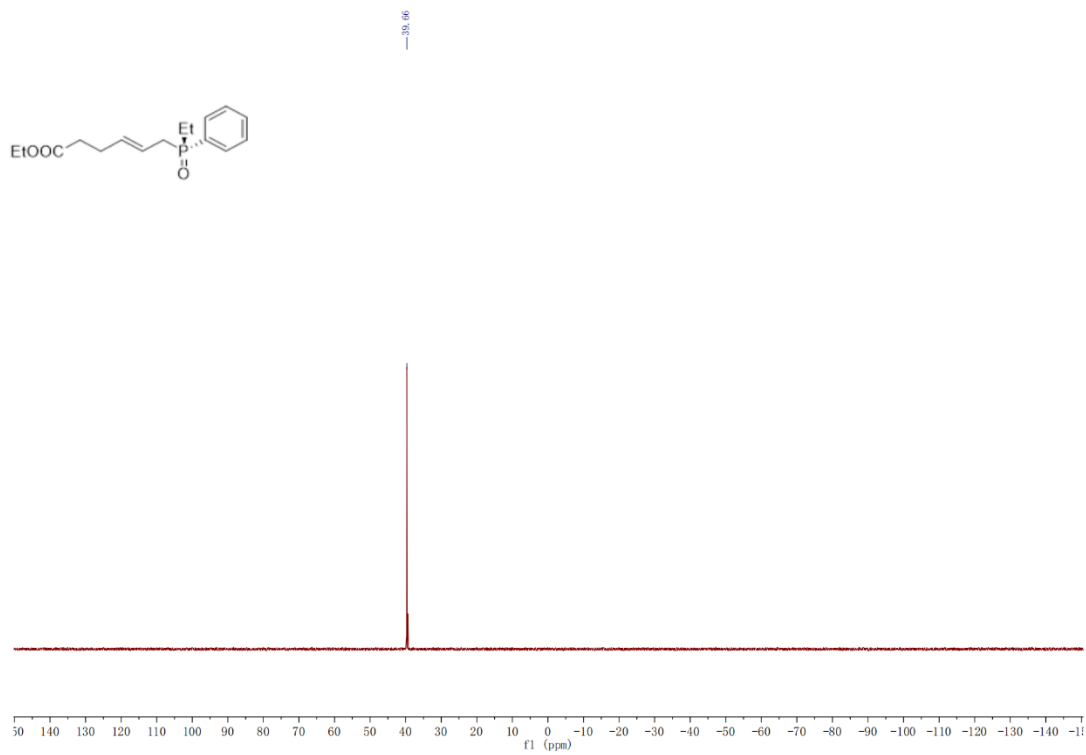

$^1\text{H}$  NMR spectra (500 MHz,  $\text{CD}_3\text{COCD}_3$ ) of **4i**



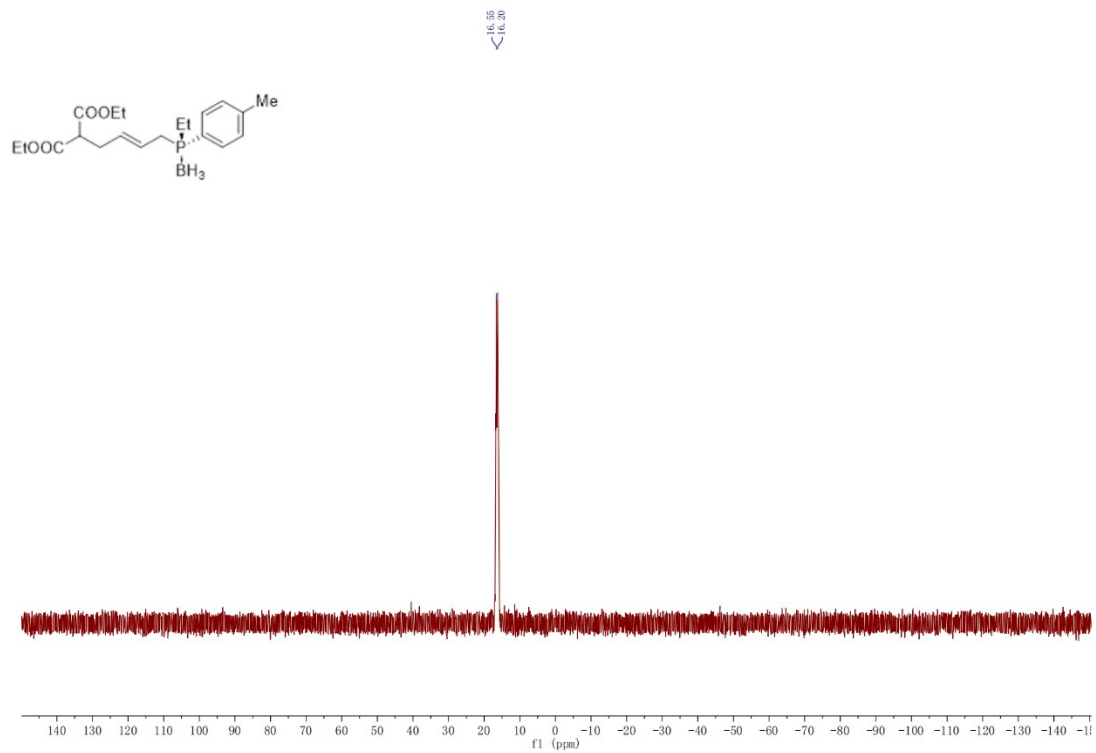

<sup>11</sup>B NMR spectra (160 MHz, CD<sub>3</sub>COCD<sub>3</sub>) of **4i**

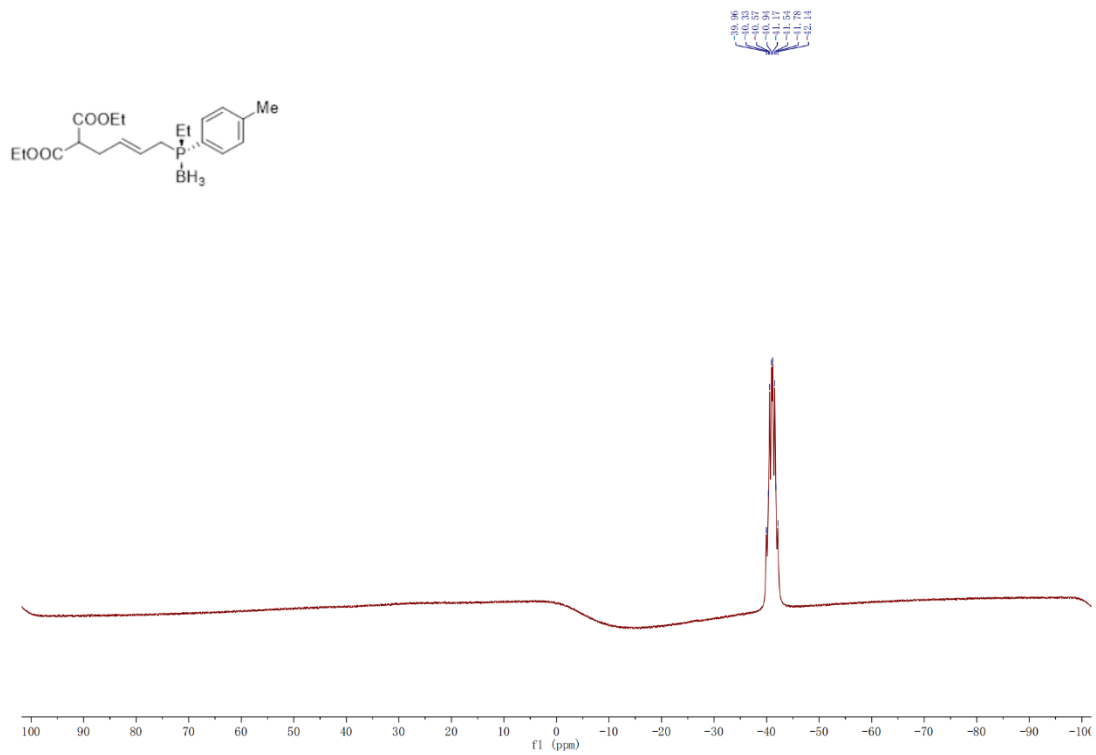

## 9. HPLC Spectra data

HPLC spectra data of **3a**

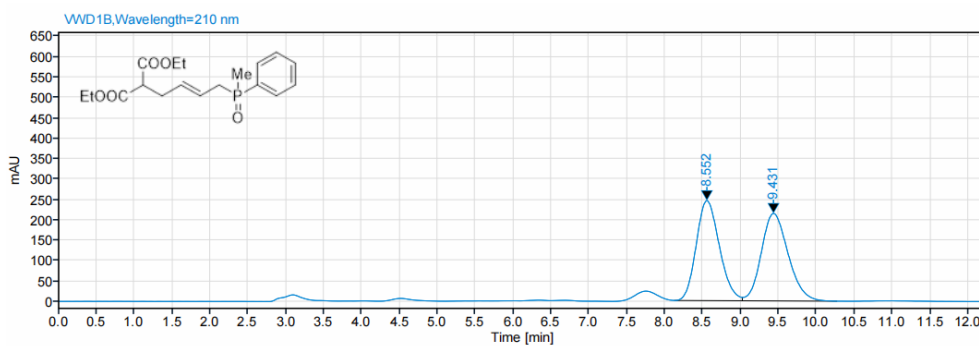

Signal: VWD1B,Wavelength=210 nm

| RT [min] | Type | Width [min] | Area     | Height | Area% | Name |
|----------|------|-------------|----------|--------|-------|------|
| 8.552    | MM m | 0.90        | 5204.94  | 245.05 | 49.65 |      |
| 9.431    | MM m | 1.25        | 5278.49  | 214.44 | 50.35 |      |
|          |      | Sum         | 10483.43 |        |       |      |

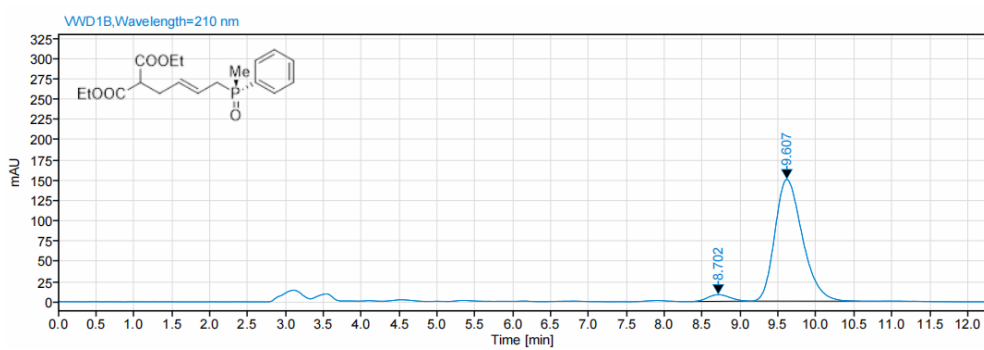

Signal: VWD1B,Wavelength=210 nm

| RT [min]   | Type | Width [min] | Area           | Height | Area% | Name |
|------------|------|-------------|----------------|--------|-------|------|
| 8.702      | MM m | 0.74        | 166.22         | 8.19   | 4.21  |      |
| 9.607      | MM m | 1.48        | 3778.91        | 149.87 | 95.79 |      |
| <b>Sum</b> |      |             | <b>3945.13</b> |        |       |      |

### HPLC spectra data of 3b

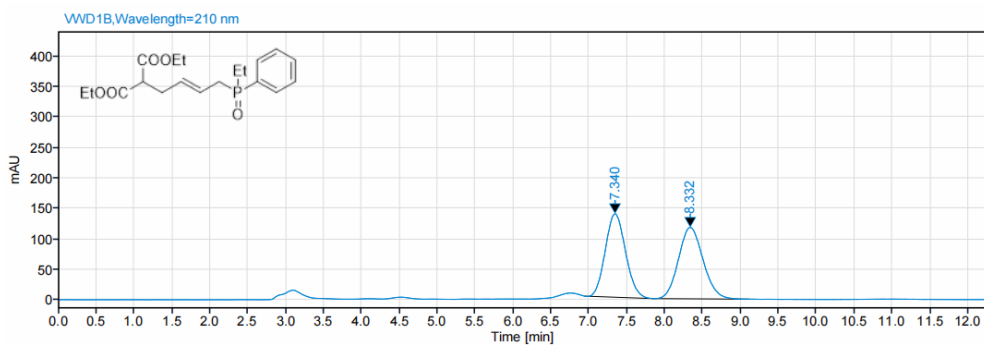

Signal: VWD1B,Wavelength=210 nm

| RT [min]   | Type | Width [min] | Area           | Height | Area% | Name |
|------------|------|-------------|----------------|--------|-------|------|
| 7.340      | MM m | 0.90        | 2537.66        | 136.85 | 48.99 |      |
| 8.332      | MM m | 1.29        | 2641.92        | 117.07 | 51.01 |      |
| <b>Sum</b> |      |             | <b>5179.59</b> |        |       |      |

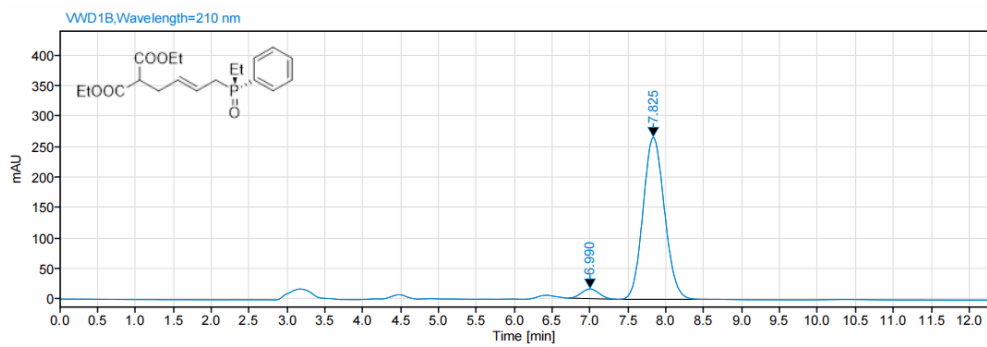

Signal: WVD1B,Wavelength=210 nm

| RT [min]   | Type | Width [min] | Area           | Height | Area% | Name |
|------------|------|-------------|----------------|--------|-------|------|
| 6.990      | MM m | 0.66        | 258.10         | 15.92  | 4.70  |      |
| 7.825      | MM m | 1.19        | 5233.15        | 265.74 | 95.30 |      |
| <b>Sum</b> |      |             | <b>5491.25</b> |        |       |      |

### HPLC spectra data of 3c

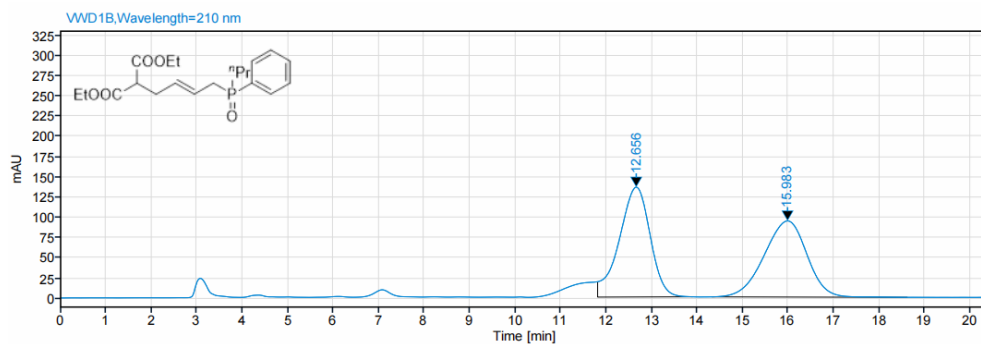

Signal: WVD1B,Wavelength=210 nm

| RT [min]   | Type | Width [min] | Area            | Height | Area% | Name |
|------------|------|-------------|-----------------|--------|-------|------|
| 12.656     | MM m | 2.09        | 6393.50         | 135.50 | 51.02 |      |
| 15.983     | MM m | 4.30        | 6138.63         | 93.92  | 48.98 |      |
| <b>Sum</b> |      |             | <b>12532.13</b> |        |       |      |

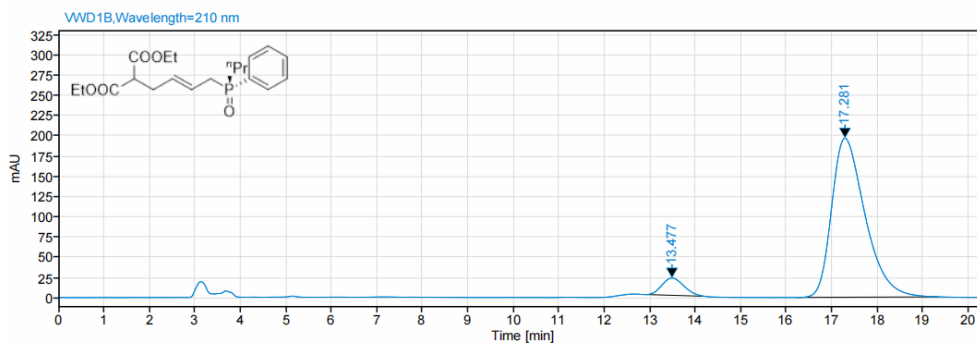

Signal: WWD1B,Wavelength=210 nm

| RT [min]   | Type | Width [min] | Area            | Height | Area% | Name |
|------------|------|-------------|-----------------|--------|-------|------|
| 13.477     | MM m | 1.27        | 713.17          | 21.31  | 6.65  |      |
| 17.281     | MM m | 3.15        | 10017.16        | 196.23 | 93.35 |      |
| <b>Sum</b> |      |             | <b>10730.33</b> |        |       |      |

### HPLC spectra data of 3d

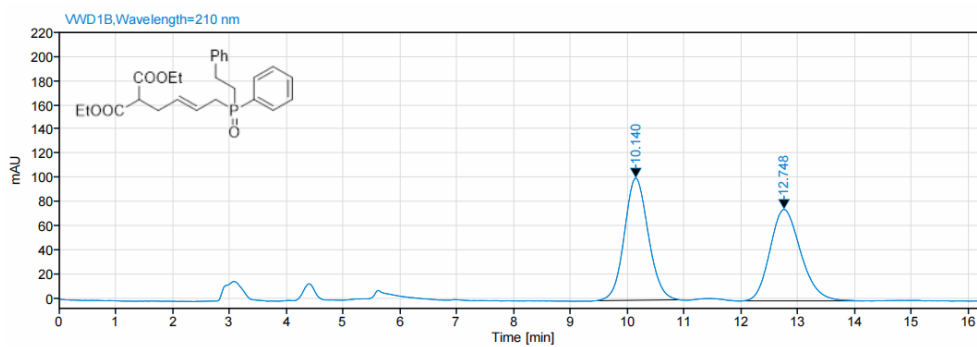

Signal: WWD1B,Wavelength=210 nm

| RT [min]   | Type | Width [min] | Area           | Height | Area% | Name |
|------------|------|-------------|----------------|--------|-------|------|
| 10.140     | MM m | 1.46        | 2962.35        | 101.14 | 51.01 |      |
| 12.748     | MM m | 2.21        | 2845.48        | 75.70  | 48.99 |      |
| <b>Sum</b> |      |             | <b>5807.83</b> |        |       |      |

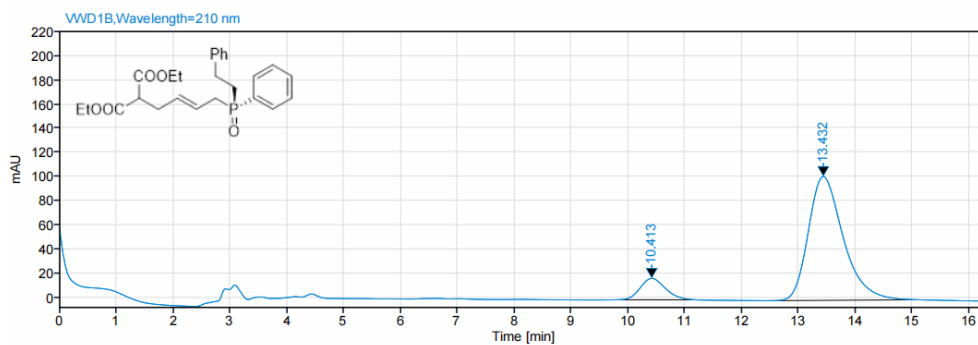

Signal: VWD1B,Wavelength=210 nm

| RT [min] | Type | Width [min] | Area    | Height | Area% | Name |
|----------|------|-------------|---------|--------|-------|------|
| 10.413   | MM m | 1.43        | 546.09  | 17.73  | 11.11 |      |
| 13.432   | MM m | 2.66        | 4368.26 | 102.50 | 88.89 |      |
| Sum      |      |             | 4914.35 |        |       |      |

### HPLC spectra data of 3e

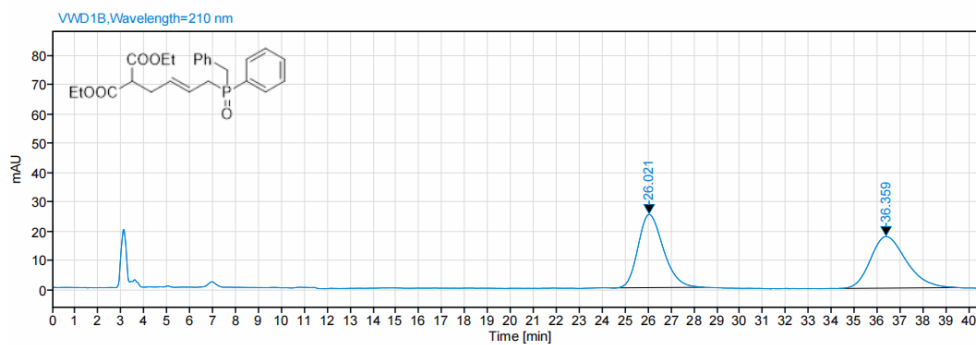

Signal: VWD1B,Wavelength=210 nm

| RT [min] | Type | Width [min] | Area    | Height | Area% | Name |
|----------|------|-------------|---------|--------|-------|------|
| 26.021   | MM m | 4.08        | 1911.17 | 24.95  | 50.06 |      |
| 36.359   | MM m | 5.19        | 1906.29 | 17.60  | 49.94 |      |
| Sum      |      |             | 3817.47 |        |       |      |



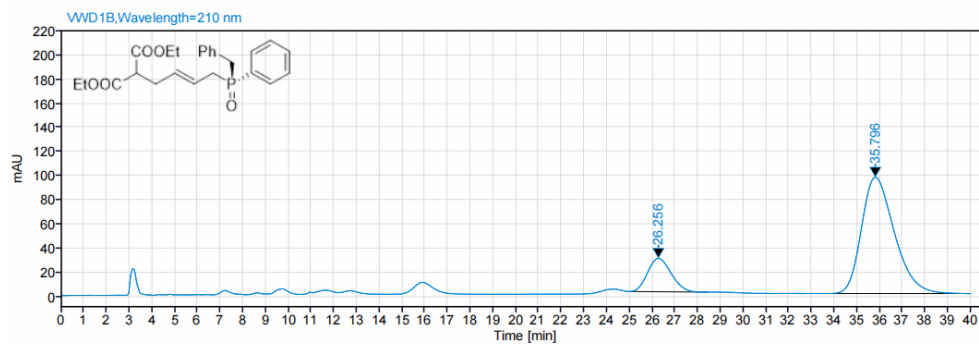

Signal: VWD1B,Wavelength=210 nm

| RT [min]   | Type | Width [min] | Area            | Height | Area% | Name |
|------------|------|-------------|-----------------|--------|-------|------|
| 26.256     | MM m | 3.45        | 1983.18         | 27.58  | 17.02 |      |
| 35.796     | MM m | 6.34        | 9670.04         | 96.30  | 82.98 |      |
| <b>Sum</b> |      |             | <b>11653.22</b> |        |       |      |

### HPLC spectra data of 3f

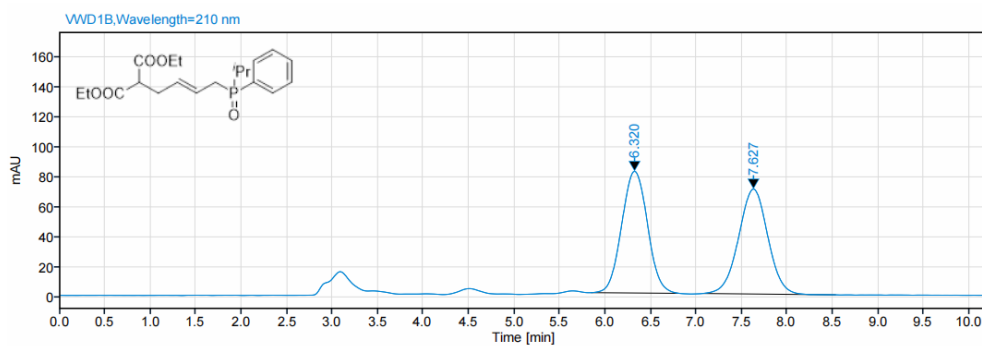

Signal: VWD1B,Wavelength=210 nm

| RT [min]   | Type | Width [min] | Area           | Height | Area% | Name |
|------------|------|-------------|----------------|--------|-------|------|
| 6.320      | MM m | 0.97        | 1599.68        | 80.99  | 50.64 |      |
| 7.627      | MM m | 1.46        | 1559.22        | 69.87  | 49.36 |      |
| <b>Sum</b> |      |             | <b>3158.91</b> |        |       |      |

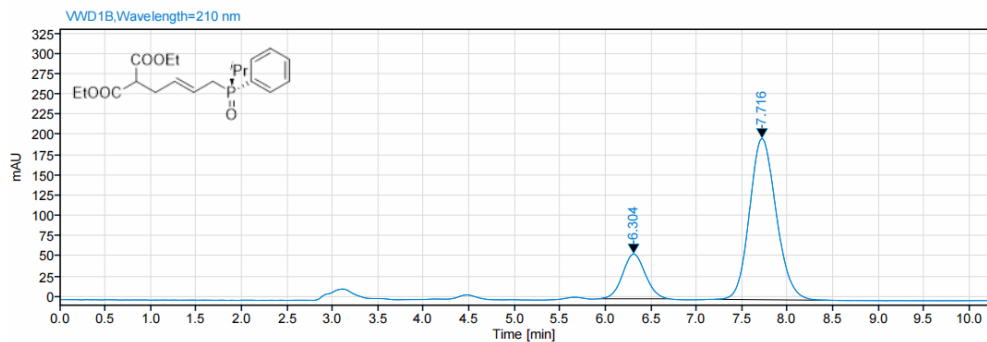

Signal: WVD1B,Wavelength=210 nm

| RT [min]   | Type | Width [min] | Area           | Height | Area% | Name |
|------------|------|-------------|----------------|--------|-------|------|
| 6.304      | MM m | 0.78        | 964.03         | 55.16  | 19.17 |      |
| 7.716      | MM m | 1.28        | 4064.36        | 198.82 | 80.83 |      |
| <b>Sum</b> |      |             | <b>5028.39</b> |        |       |      |

### HPLC spectra data of 3g

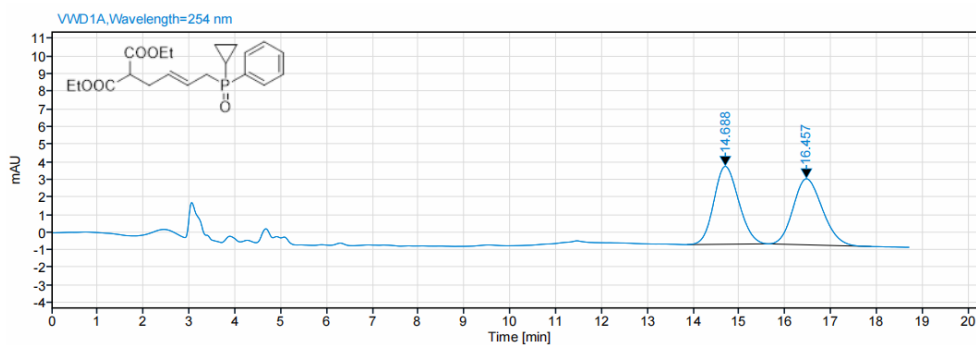

Signal: WVD1A,Wavelength=254 nm

| RT [min]   | Type | Width [min] | Area          | Height | Area% | Name |
|------------|------|-------------|---------------|--------|-------|------|
| 14.688     | MM m | 1.76        | 166.38        | 4.43   | 50.05 |      |
| 16.457     | MM m | 2.26        | 166.03        | 3.75   | 49.95 |      |
| <b>Sum</b> |      |             | <b>332.42</b> |        |       |      |

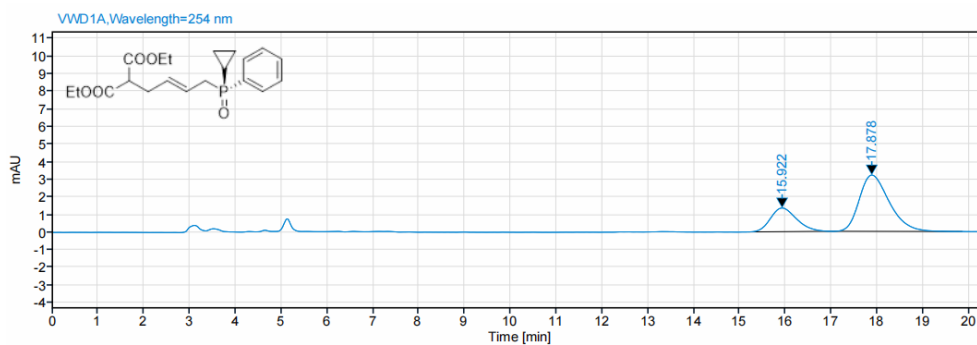

Signal: VWD1A,Wavelength=254 nm

| RT [min]   | Type | Width [min] | Area          | Height | Area% | Name |
|------------|------|-------------|---------------|--------|-------|------|
| 15.922     | MM m | 1.79        | 52.99         | 1.34   | 26.71 |      |
| 17.878     | MM m | 2.87        | 145.36        | 3.20   | 73.29 |      |
| <b>Sum</b> |      |             | <b>198.35</b> |        |       |      |

### HPLC spectra data of 3h

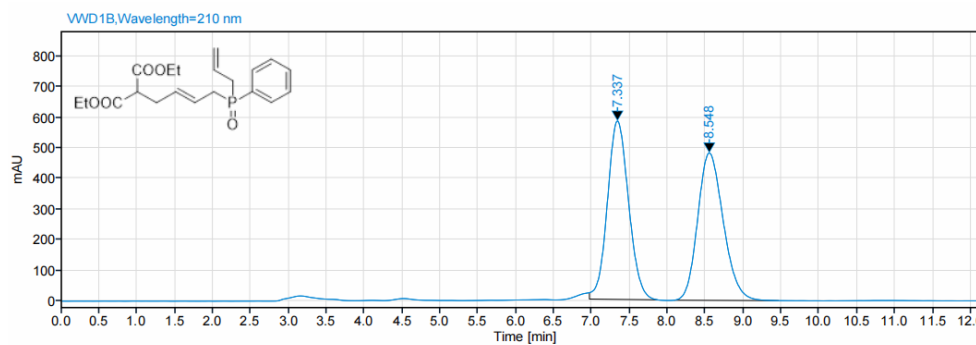

Signal: VWD1B,Wavelength=210 nm

| RT [min]   | Type | Width [min] | Area            | Height | Area% | Name |
|------------|------|-------------|-----------------|--------|-------|------|
| 7.337      | MM m | 0.90        | 11332.27        | 582.13 | 50.13 |      |
| 8.548      | MM m | 1.38        | 11275.59        | 481.17 | 49.87 |      |
| <b>Sum</b> |      |             | <b>22607.86</b> |        |       |      |

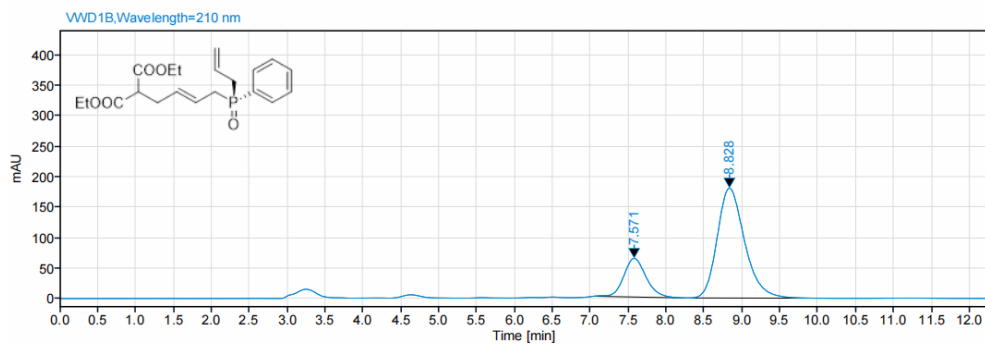

Signal: VWD1B,Wavelength=210 nm

| RT [min]   | Type | Width [min] | Area           | Height | Area% | Name |
|------------|------|-------------|----------------|--------|-------|------|
| 7.571      | MM m | 1.20        | 1294.68        | 63.29  | 22.20 |      |
| 8.828      | MM m | 1.80        | 4538.32        | 180.26 | 77.80 |      |
| <b>Sum</b> |      |             | <b>5833.00</b> |        |       |      |

### HPLC spectra data of 3i

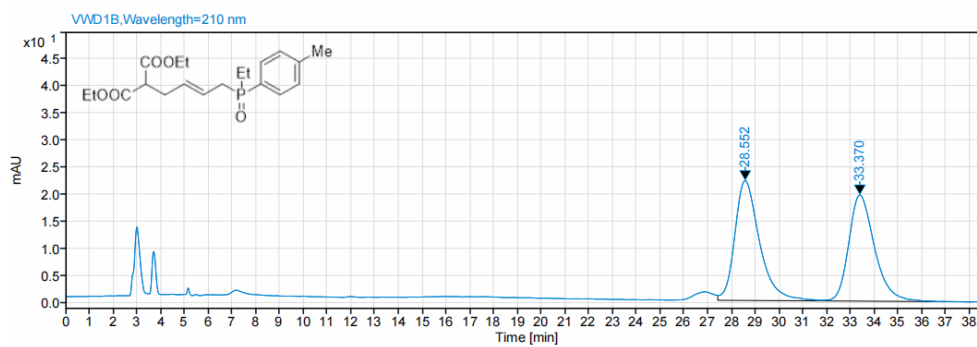

Signal: VWD1B,Wavelength=210 nm

| RT [min]   | Type | Width [min] | Area           | Height | Area% | Name |
|------------|------|-------------|----------------|--------|-------|------|
| 28.552     | MM m | 3.97        | 1598.50        | 22.14  | 51.96 |      |
| 33.370     | MM m | 6.78        | 1477.89        | 19.62  | 48.04 |      |
| <b>Sum</b> |      |             | <b>3076.39</b> |        |       |      |

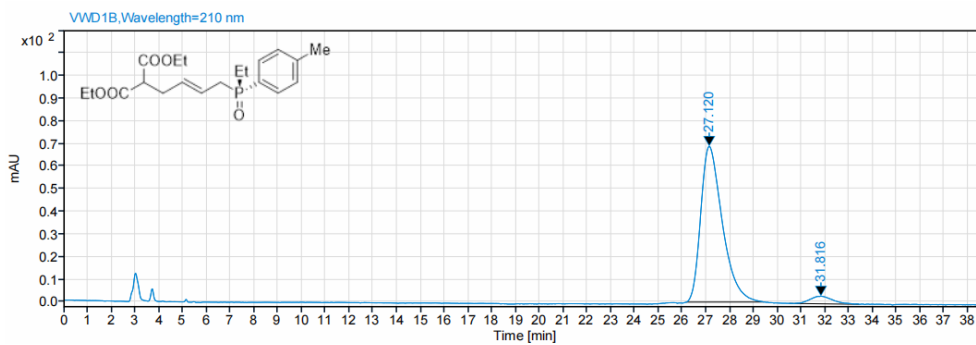

Signal: VWD1B,Wavelength=210 nm

| RT [min]   | Type | Width [min] | Area           | Height | Area% | Name |
|------------|------|-------------|----------------|--------|-------|------|
| 27.120     | MM m | 3.27        | 4347.19        | 68.86  | 95.14 |      |
| 31.816     | MM m | 2.94        | 222.03         | 3.35   | 4.86  |      |
| <b>Sum</b> |      |             | <b>4569.22</b> |        |       |      |

### HPLC spectra data of 3j

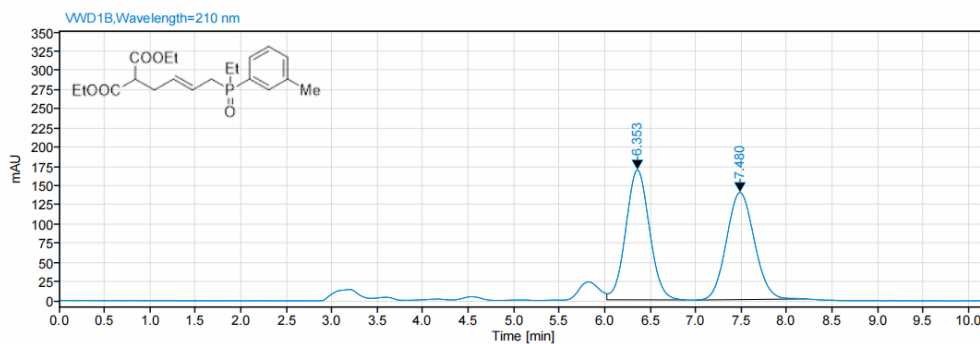

Signal: VWD1B,Wavelength=210 nm

| RT [min]   | Type | Width [min] | Area           | Height | Area% | Name |
|------------|------|-------------|----------------|--------|-------|------|
| 6.353      | MM m | 0.86        | 3061.19        | 169.15 | 50.77 |      |
| 7.480      | MM m | 1.21        | 2968.57        | 139.53 | 49.23 |      |
| <b>Sum</b> |      |             | <b>6029.77</b> |        |       |      |

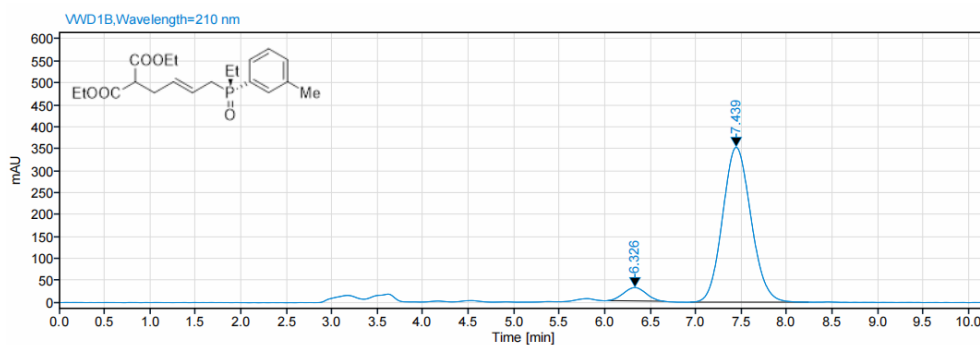

Signal: VWD1B,Wavelength=210 nm

| RT [min]   | Type | Width [min] | Area           | Height | Area% | Name |
|------------|------|-------------|----------------|--------|-------|------|
| 6.326      | MM m | 0.62        | 519.09         | 30.42  | 6.35  |      |
| 7.439      | MM m | 1.30        | 7651.73        | 352.62 | 93.65 |      |
| <b>Sum</b> |      |             | <b>8170.82</b> |        |       |      |

### HPLC spectra data of 3k

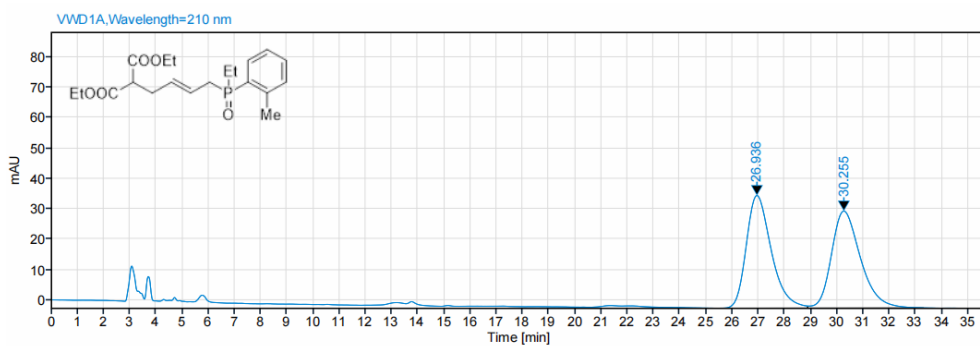

Signal: VWD1A,Wavelength=210 nm

| RT [min]   | Type | Width [min] | Area           | Height | Area% | Name |
|------------|------|-------------|----------------|--------|-------|------|
| 26.936     | MM m | 3.48        | 2449.05        | 37.02  | 49.96 |      |
| 30.255     | MM m | 4.44        | 2453.42        | 31.87  | 50.04 |      |
| <b>Sum</b> |      |             | <b>4902.48</b> |        |       |      |

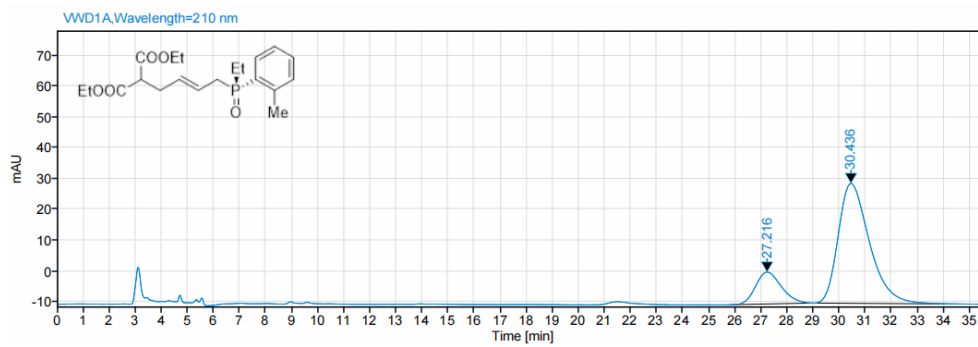

Signal: VWD1A,Wavelength=210 nm

| RT [min] | Type | Width [min] | Area           | Height | Area% | Name |
|----------|------|-------------|----------------|--------|-------|------|
| 27.216   | MM m | 3.10        | 709.51         | 10.36  | 17.98 |      |
| 30.436   | MM m | 5.80        | 3235.59        | 38.93  | 82.02 |      |
|          |      | <b>Sum</b>  | <b>3945.10</b> |        |       |      |

### HPLC spectra data of 31

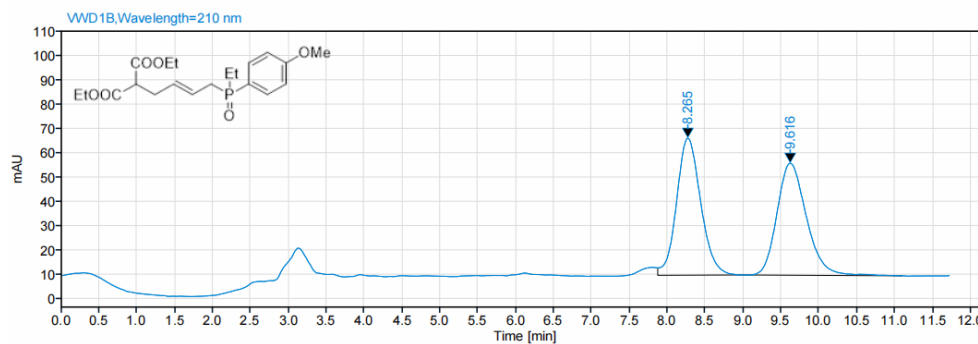

Signal: VWD1B,Wavelength=210 nm

| RT [min] | Type | Width [min] | Area           | Height | Area% | Name |
|----------|------|-------------|----------------|--------|-------|------|
| 8.265    | MM m | 1.12        | 1242.12        | 56.18  | 50.04 |      |
| 9.616    | MM m | 2.11        | 1240.17        | 45.95  | 49.96 |      |
|          |      | <b>Sum</b>  | <b>2482.30</b> |        |       |      |

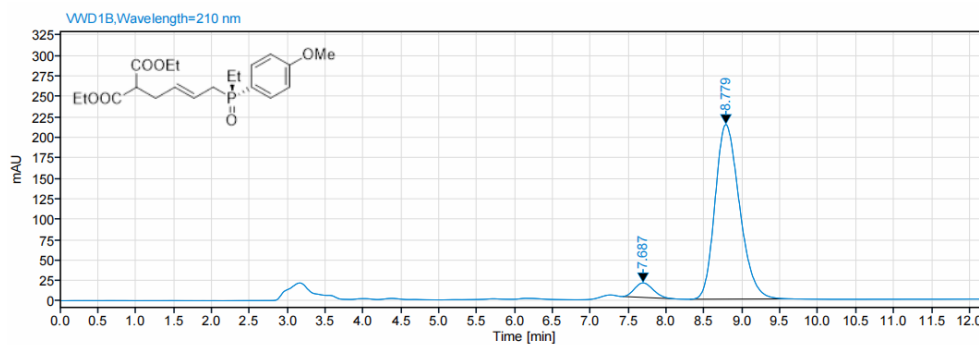

Signal: WWD1B,Wavelength=210 nm

| RT [min]   | Type | Width [min] | Area           | Height | Area% | Name |
|------------|------|-------------|----------------|--------|-------|------|
| 7.687      | MM m | 0.70        | 303.15         | 17.72  | 5.94  |      |
| 8.779      | MM m | 1.36        | 4800.40        | 213.30 | 94.06 |      |
| <b>Sum</b> |      |             | <b>5103.56</b> |        |       |      |

### HPLC spectra data of 3m

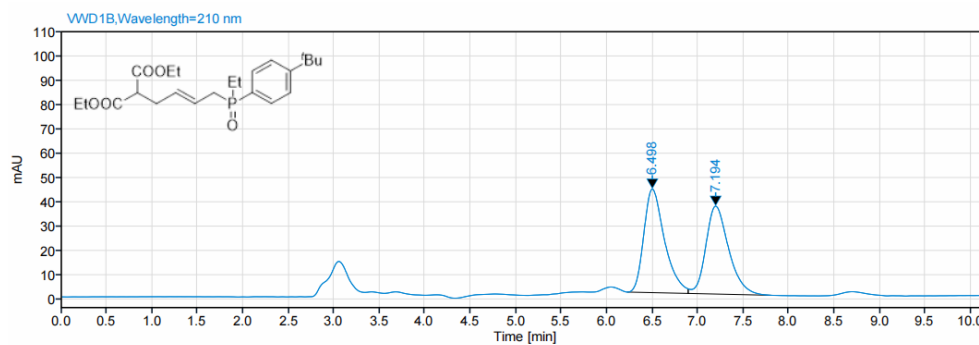

Signal: WWD1B,Wavelength=210 nm

| RT [min]   | Type | Width [min] | Area           | Height | Area% | Name |
|------------|------|-------------|----------------|--------|-------|------|
| 6.498      | MM m | 0.67        | 674.46         | 42.49  | 51.65 |      |
| 7.194      | MM m | 0.91        | 631.49         | 36.05  | 48.35 |      |
| <b>Sum</b> |      |             | <b>1305.95</b> |        |       |      |



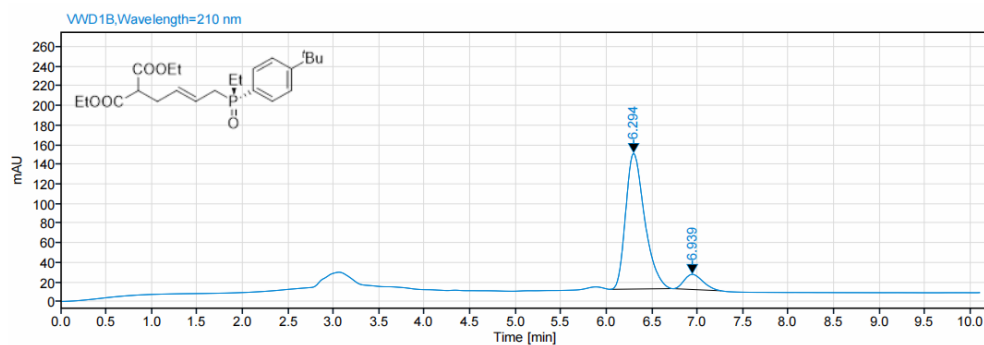

Signal: WVD1B,Wavelength=210 nm

| RT [min]   | Type | Width [min] | Area           | Height | Area% | Name |
|------------|------|-------------|----------------|--------|-------|------|
| 6.294      | MM m | 0.69        | 2008.64        | 138.21 | 90.07 |      |
| 6.939      | MM m | 0.54        | 221.43         | 15.42  | 9.93  |      |
| <b>Sum</b> |      |             | <b>2230.07</b> |        |       |      |

### HPLC spectra data of 3n

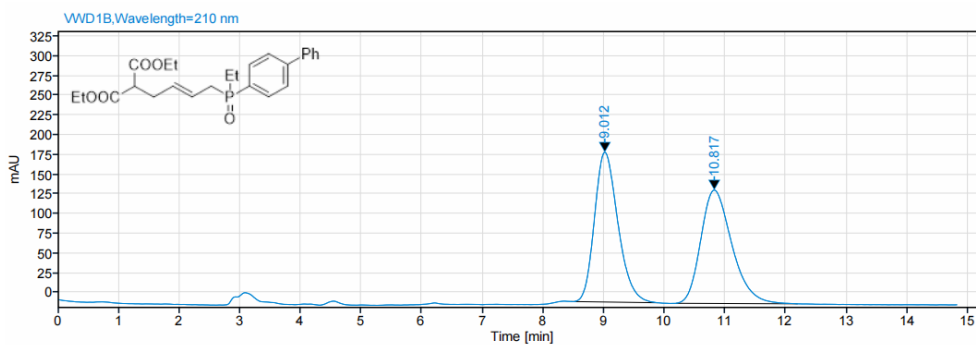

Signal: WVD1B,Wavelength=210 nm

| RT [min]   | Type | Width [min] | Area            | Height | Area% | Name |
|------------|------|-------------|-----------------|--------|-------|------|
| 9.012      | MM m | 1.43        | 5096.54         | 189.56 | 49.86 |      |
| 10.817     | MM m | 2.01        | 5124.59         | 143.62 | 50.14 |      |
| <b>Sum</b> |      |             | <b>10221.13</b> |        |       |      |

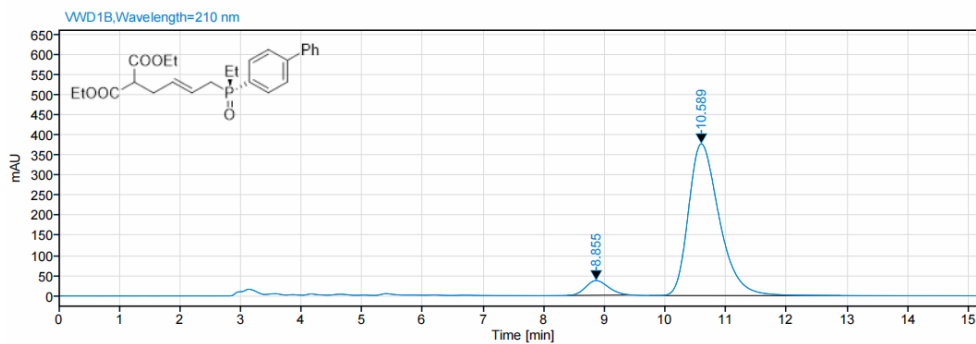

Signal: WWD1B,Wavelength=210 nm

| RT [min]   | Type | Width [min] | Area            | Height | Area% | Name |
|------------|------|-------------|-----------------|--------|-------|------|
| 8.855      | MM m | 1.08        | 952.63          | 36.48  | 6.70  |      |
| 10.589     | MM m | 3.15        | 13264.92        | 377.00 | 93.30 |      |
| <b>Sum</b> |      |             | <b>14217.55</b> |        |       |      |

### HPLC spectra data of 3o

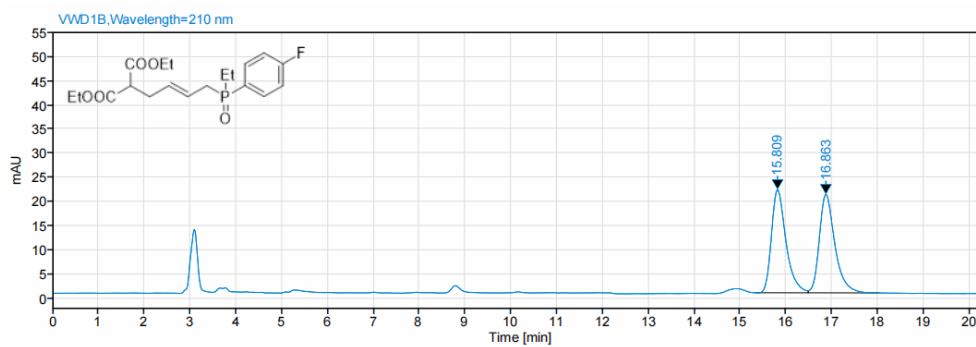

Signal: VWD1B,Wavelength=210 nm

| RT [min]   | Type | Width [min] | Area          | Height | Area% | Name |
|------------|------|-------------|---------------|--------|-------|------|
| 15.809     | MM m | 1.17        | 469.86        | 21.33  | 49.47 |      |
| 16.863     | MM m | 1.56        | 479.98        | 20.38  | 50.53 |      |
| <b>Sum</b> |      |             | <b>949.84</b> |        |       |      |

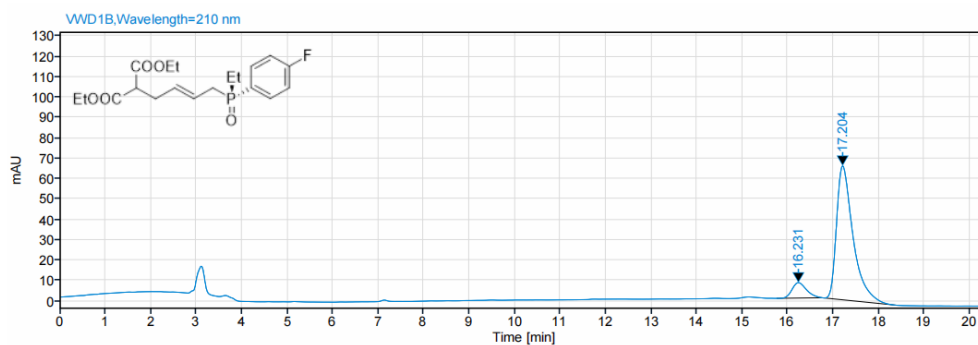

Signal: VWD1B,Wavelength=210 nm

| RT [min] | Type | Width [min] | Area           | Height | Area% | Name |
|----------|------|-------------|----------------|--------|-------|------|
| 16.231   | MM m | 1.00        | 167.19         | 7.56   | 9.16  |      |
| 17.204   | MM m | 1.65        | 1658.58        | 65.78  | 90.84 |      |
|          |      | <b>Sum</b>  | <b>1825.78</b> |        |       |      |

### HPLC spectra data of 3p

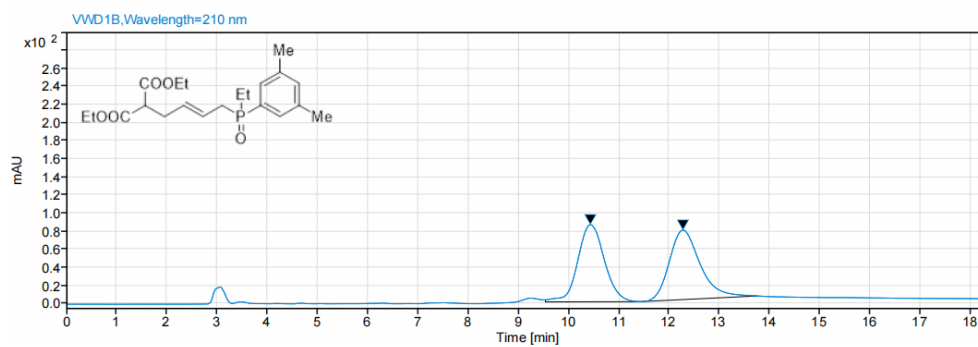

Signal: VWD1B,Wavelength=210 nm

| RT [min] | Type | Width [min] | Area           | Height | Area% | Name |
|----------|------|-------------|----------------|--------|-------|------|
| 10.424   | MM m | 1.89        | 3143.74        | 85.24  | 49.03 |      |
| 12.268   | MM m | 2.34        | 3268.67        | 76.85  | 50.97 |      |
|          |      | <b>Sum</b>  | <b>6412.41</b> |        |       |      |

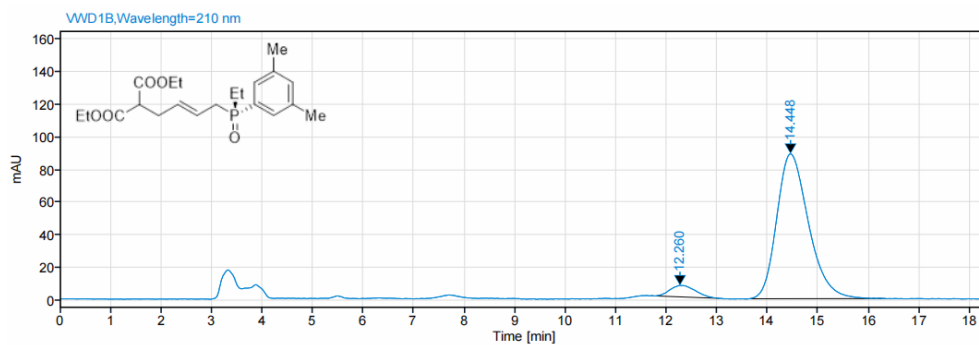

Signal: VWD1B,Wavelength=210 nm

| RT [min]   | Type | Width [min] | Area           | Height | Area% | Name |
|------------|------|-------------|----------------|--------|-------|------|
| 12.260     | MM m | 1.35        | 246.84         | 6.98   | 5.98  |      |
| 14.448     | MM m | 2.91        | 3878.27        | 88.80  | 94.02 |      |
| <b>Sum</b> |      |             | <b>4125.12</b> |        |       |      |

### HPLC spectra data of 3q

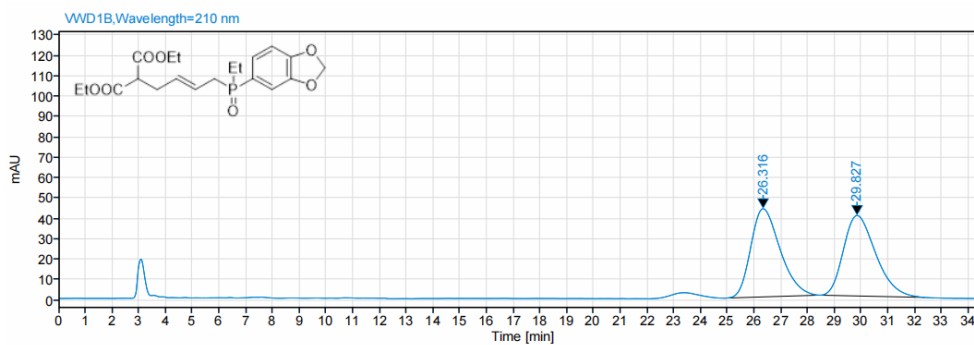

Signal: VWD1B,Wavelength=210 nm

| RT [min]   | Type | Width [min] | Area           | Height | Area% | Name |
|------------|------|-------------|----------------|--------|-------|------|
| 26.316     | MM m | 3.54        | 3304.23        | 43.32  | 49.96 |      |
| 29.827     | MM m | 3.94        | 3308.91        | 39.54  | 50.04 |      |
| <b>Sum</b> |      |             | <b>6613.14</b> |        |       |      |

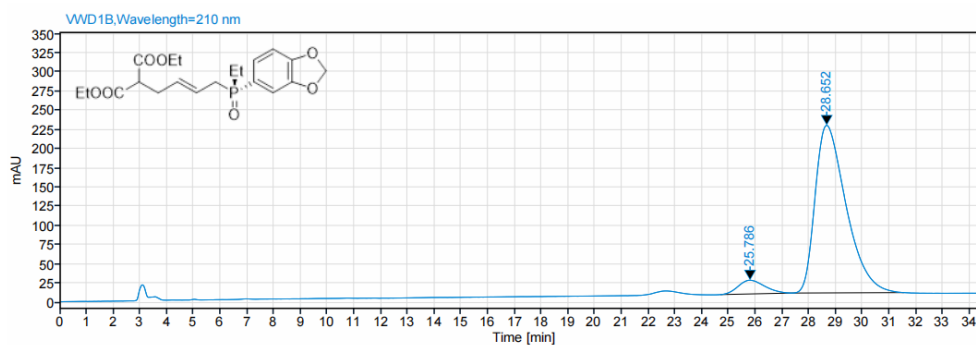

Signal: WWD1B,Wavelength=210 nm

| RT [min]   | Type | Width [min] | Area            | Height | Area% | Name |
|------------|------|-------------|-----------------|--------|-------|------|
| 25.786     | MM m | 2.64        | 1223.76         | 17.84  | 6.51  |      |
| 28.652     | MM m | 4.23        | 17563.00        | 218.32 | 93.49 |      |
| <b>Sum</b> |      |             | <b>18786.76</b> |        |       |      |

### HPLC spectra data of 3r

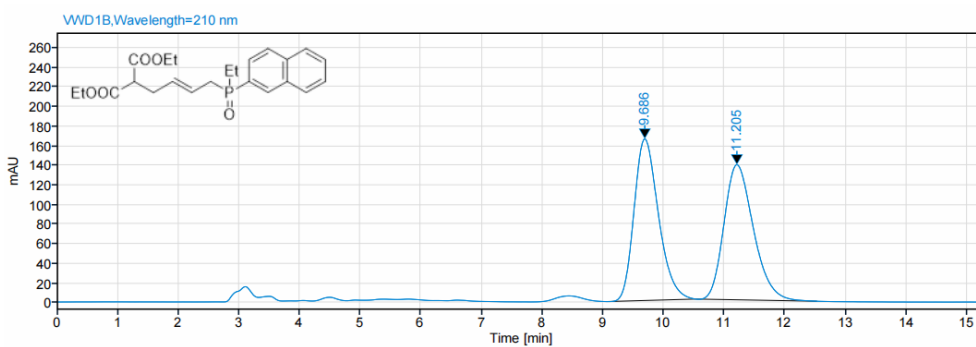

Signal: WWD1B,Wavelength=210 nm

| RT [min]   | Type | Width [min] | Area           | Height | Area% | Name |
|------------|------|-------------|----------------|--------|-------|------|
| 9.686      | MM m | 1.48        | 4602.74        | 164.67 | 49.79 |      |
| 11.205     | MM m | 2.00        | 4640.68        | 137.63 | 50.21 |      |
| <b>Sum</b> |      |             | <b>9243.43</b> |        |       |      |

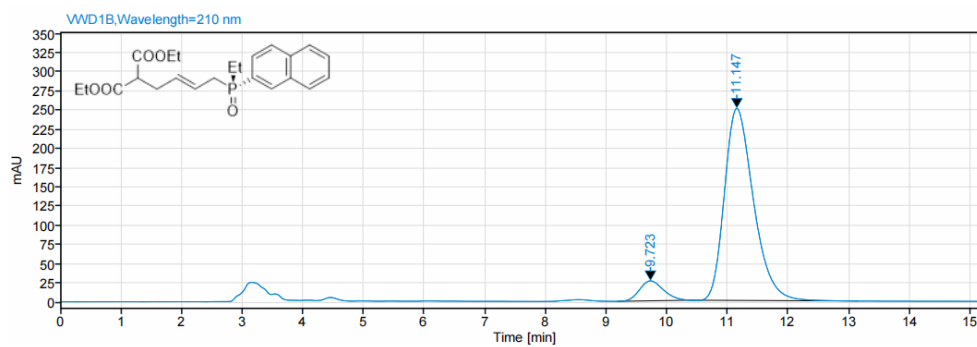

Signal: VWD1B,Wavelength=210 nm

| RT [min]   | Type | Width [min] | Area           | Height | Area% | Name |
|------------|------|-------------|----------------|--------|-------|------|
| 9.723      | MM m | 1.19        | 711.56         | 25.98  | 7.86  |      |
| 11.147     | MM m | 2.79        | 8345.67        | 250.17 | 92.14 |      |
| <b>Sum</b> |      |             | <b>9057.23</b> |        |       |      |

### HPLC spectra data of 3s

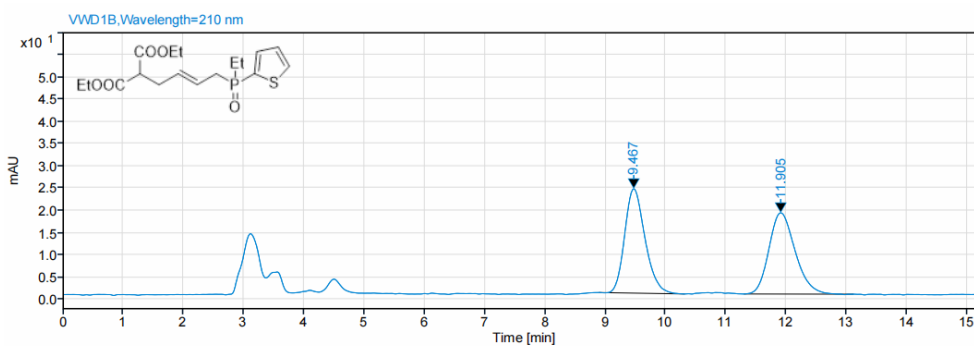

Signal: VWD1B,Wavelength=210 nm

| RT [min]   | Type | Width [min] | Area           | Height | Area% | Name |
|------------|------|-------------|----------------|--------|-------|------|
| 9.467      | MM m | 1.43        | 550.03         | 23.44  | 50.01 |      |
| 11.905     | MM m | 1.82        | 549.88         | 18.25  | 49.99 |      |
| <b>Sum</b> |      |             | <b>1099.91</b> |        |       |      |

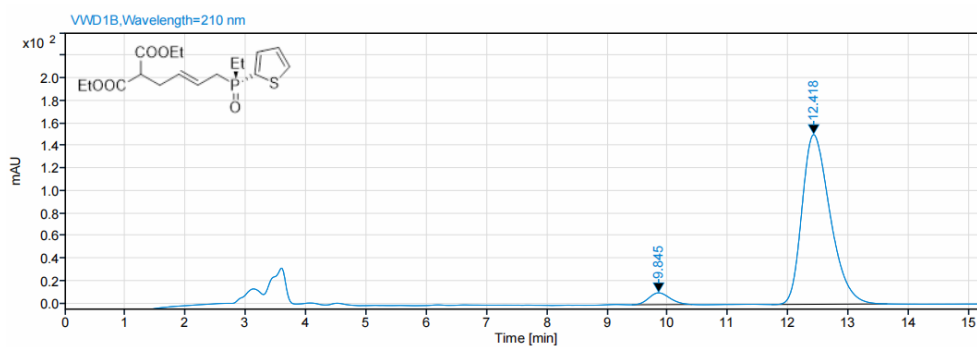

Signal: VWD1B,Wavelength=210 nm

| RT [min] | Type | Width [min] | Area    | Height | Area% | Name |
|----------|------|-------------|---------|--------|-------|------|
| 9.845    | MM m | 1.00        | 255.71  | 10.48  | 4.97  |      |
| 12.418   | MM m | 1.92        | 4892.80 | 150.66 | 95.03 |      |
| Sum      |      |             | 5148.51 |        |       |      |

### HPLC spectra data of 3t

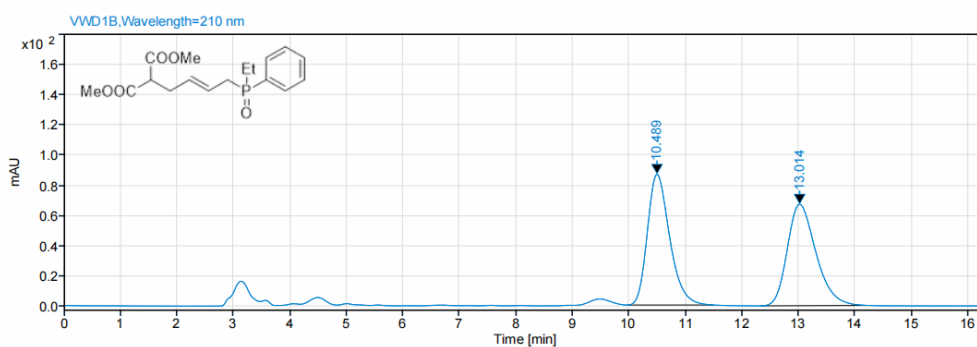

Signal: VWD1B,Wavelength=210 nm

| RT [min] | Type | Width [min] | Area    | Height | Area% | Name |
|----------|------|-------------|---------|--------|-------|------|
| 10.489   | MM m | 1.52        | 2363.50 | 86.22  | 50.09 |      |
| 13.014   | MM m | 1.91        | 2355.03 | 66.92  | 49.91 |      |
| Sum      |      |             | 4718.53 |        |       |      |

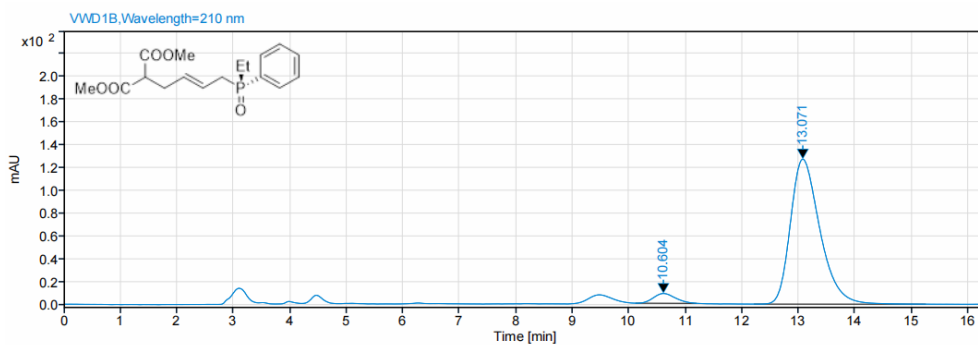

Signal: VWD1B,Wavelength=210 nm

| RT [min]   | Type | Width [min] | Area           | Height | Area% | Name |
|------------|------|-------------|----------------|--------|-------|------|
| 10.604     | MM m | 1.08        | 228.73         | 8.53   | 4.73  |      |
| 13.071     | MM m | 3.04        | 4604.72        | 127.10 | 95.27 |      |
| <b>Sum</b> |      |             | <b>4833.45</b> |        |       |      |

### HPLC spectra data of 3u

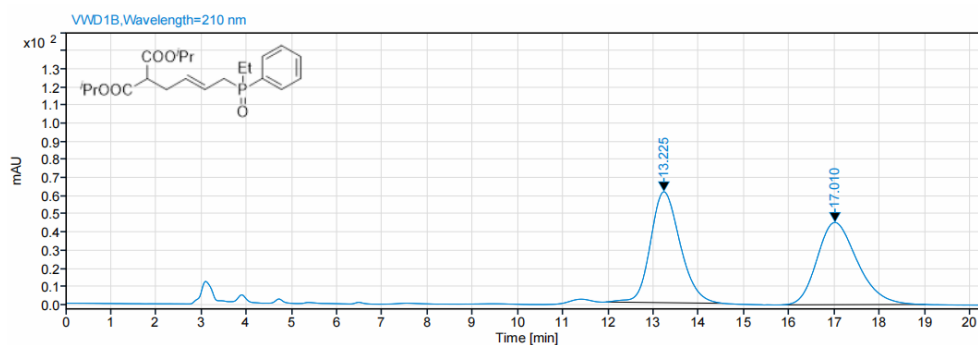

Signal: VWD1B,Wavelength=210 nm

| RT [min]   | Type | Width [min] | Area           | Height | Area% | Name |
|------------|------|-------------|----------------|--------|-------|------|
| 13.225     | MM m | 2.60        | 2788.55        | 61.07  | 49.88 |      |
| 17.010     | MM m | 3.18        | 2802.27        | 45.31  | 50.12 |      |
| <b>Sum</b> |      |             | <b>5590.82</b> |        |       |      |



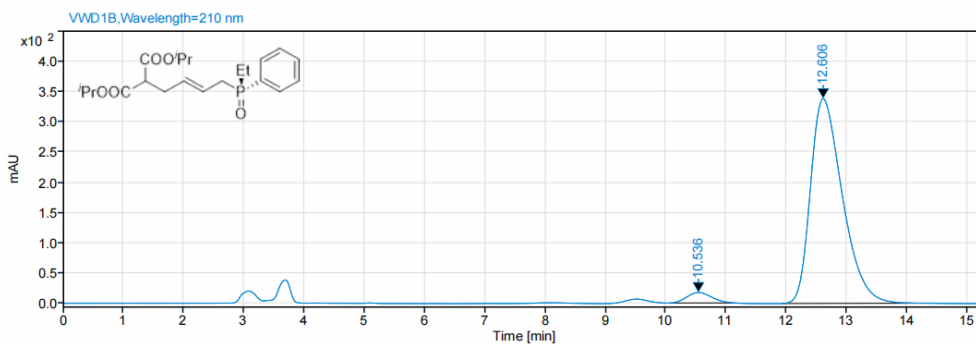

Signal: VWD1B,Wavelength=210 nm

| RT [min]   | Type | Width [min] | Area            | Height | Area% | Name |
|------------|------|-------------|-----------------|--------|-------|------|
| 10.536     | MM m | 1.07        | 489.72          | 17.23  | 3.79  |      |
| 12.606     | MM m | 2.33        | 12419.86        | 337.75 | 96.21 |      |
| <b>Sum</b> |      |             | <b>12909.57</b> |        |       |      |

### HPLC spectra data of 3v

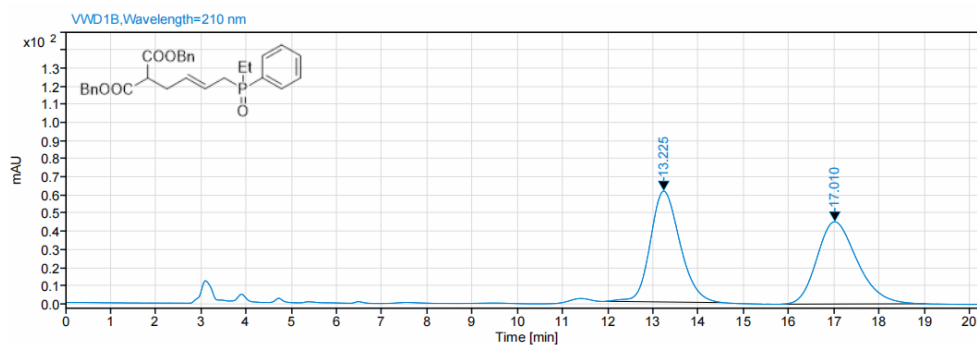

Signal: VWD1B,Wavelength=210 nm

| RT [min]   | Type | Width [min] | Area           | Height | Area% | Name |
|------------|------|-------------|----------------|--------|-------|------|
| 13.225     | MM m | 2.60        | 2788.55        | 61.07  | 49.88 |      |
| 17.010     | MM m | 3.18        | 2802.27        | 45.31  | 50.12 |      |
| <b>Sum</b> |      |             | <b>5590.82</b> |        |       |      |

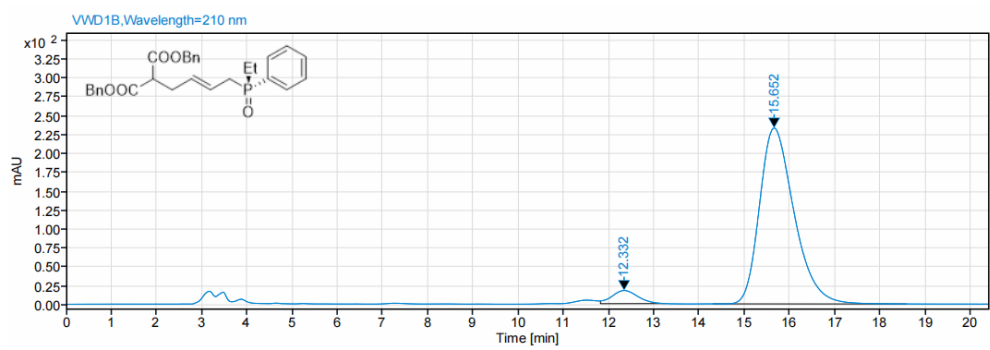

Signal: VWD1B,Wavelength=210 nm

| RT [min] | Type | Width [min] | Area            | Height | Area% | Name |
|----------|------|-------------|-----------------|--------|-------|------|
| 12.332   | MM m | 1.43        | 693.99          | 17.37  | 5.32  |      |
| 15.652   | MM m | 4.30        | 12359.27        | 232.71 | 94.68 |      |
|          |      | <b>Sum</b>  | <b>13053.26</b> |        |       |      |

### HPLC spectra data of 3w

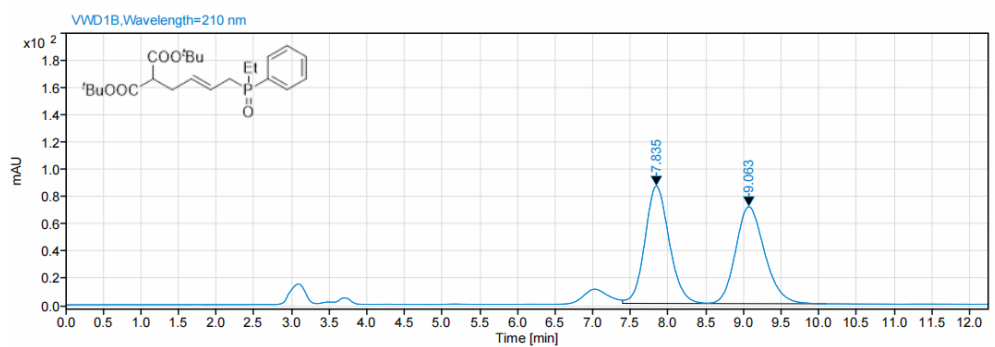

Signal: VWD1B,Wavelength=210 nm

| RT [min] | Type | Width [min] | Area           | Height | Area% | Name |
|----------|------|-------------|----------------|--------|-------|------|
| 7.835    | MM m | 1.10        | 1926.19        | 85.94  | 50.30 |      |
| 9.063    | MM m | 1.61        | 1903.47        | 70.97  | 49.70 |      |
|          |      | <b>Sum</b>  | <b>3829.67</b> |        |       |      |

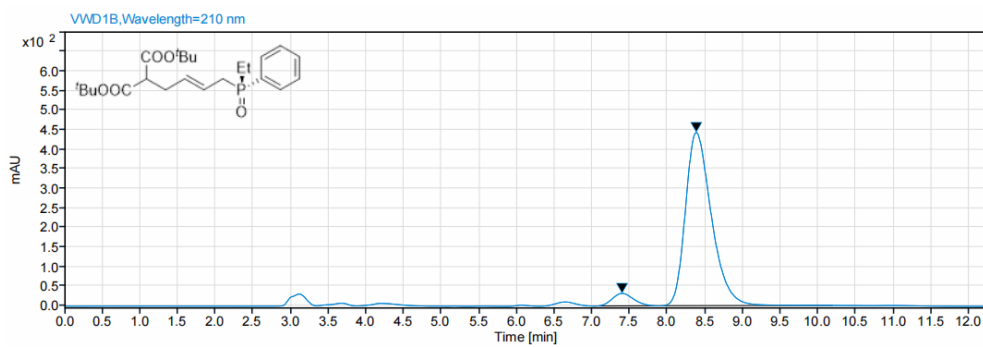

Signal: VWD1B,Wavelength=210 nm

| RT [min]   | Type | Width [min] | Area            | Height | Area% | Name |
|------------|------|-------------|-----------------|--------|-------|------|
| 7.395      | MM m | 0.81        | 624.28          | 31.95  | 5.57  |      |
| 8.380      | MM m | 2.37        | 10592.20        | 442.63 | 94.43 |      |
| <b>Sum</b> |      |             | <b>11216.48</b> |        |       |      |

### HPLC spectra data of 4a

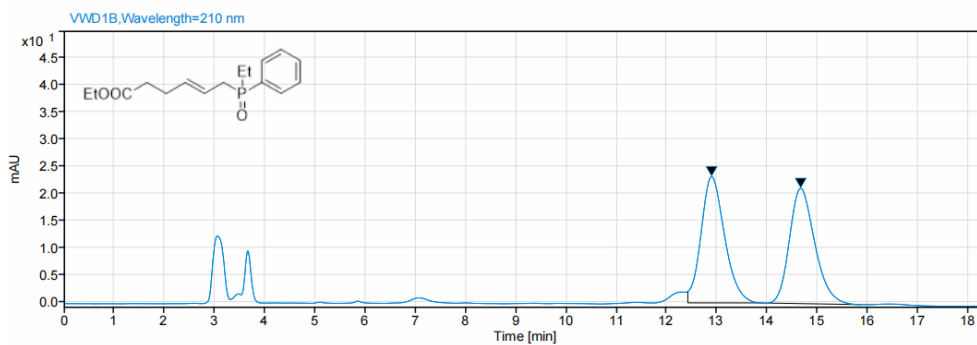

Signal: VWD1B,Wavelength=210 nm

| RT [min]   | Type | Width [min] | Area           | Height | Area% | Name |
|------------|------|-------------|----------------|--------|-------|------|
| 12.888     | MM m | 1.41        | 762.29         | 23.34  | 50.57 |      |
| 14.661     | MM m | 2.03        | 745.11         | 21.32  | 49.43 |      |
| <b>Sum</b> |      |             | <b>1507.40</b> |        |       |      |

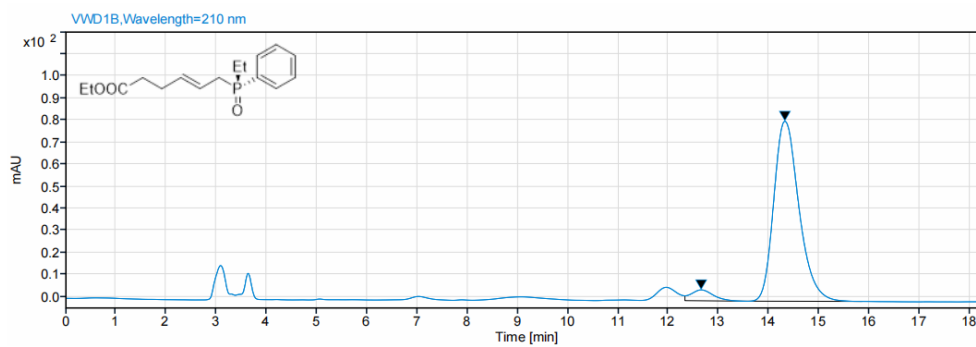

Signal: VWD1B,Wavelength=210 nm

| RT [min]   | Type | Width [min] | Area           | Height | Area% | Name |
|------------|------|-------------|----------------|--------|-------|------|
| 12.649     | MM m | 1.16        | 153.09         | 4.92   | 5.11  |      |
| 14.316     | MM m | 2.37        | 2842.81        | 81.53  | 94.89 |      |
| <b>Sum</b> |      |             | <b>2995.89</b> |        |       |      |

### HPLC spectra data of 4i

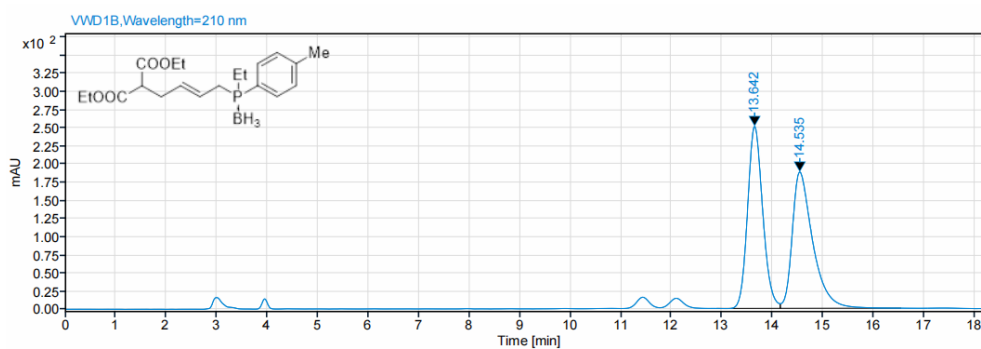

Signal: VWD1B,Wavelength=210 nm

| RT [min]   | Type | Width [min] | Area            | Height | Area% | Name |
|------------|------|-------------|-----------------|--------|-------|------|
| 13.642     | MM m | 1.26        | 5207.53         | 250.26 | 49.67 |      |
| 14.535     | MM m | 2.39        | 5277.05         | 187.48 | 50.33 |      |
| <b>Sum</b> |      |             | <b>10484.58</b> |        |       |      |

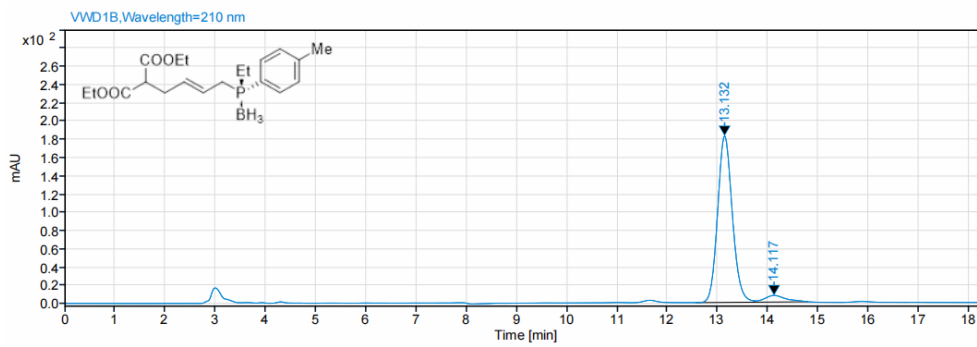

Signal: VWD1B,Wavelength=210 nm

| RT [min]   | Type | Width [min] | Area           | Height | Area% | Name |
|------------|------|-------------|----------------|--------|-------|------|
| 13.132     | MM m | 1.16        | 3703.15        | 182.14 | 94.51 |      |
| 14.117     | MM m | 1.08        | 215.30         | 7.20   | 5.49  |      |
| <b>Sum</b> |      |             | <b>3918.45</b> |        |       |      |

HPLC spectra data of **2a**

HPLC chart for **2a** before the reaction

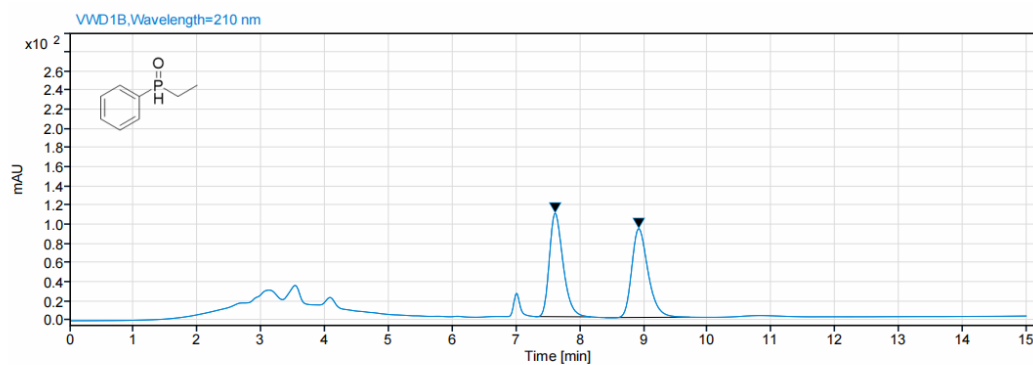

Signal: VWD1B,Wavelength=210 nm

| RT [min]   | Type | Width [min] | Area           | Height | Area% | Name |
|------------|------|-------------|----------------|--------|-------|------|
| 7.605      | MM m | 0.88        | 1615.24        | 107.98 | 49.47 |      |
| 8.916      | MM m | 1.33        | 1650.09        | 92.64  | 50.53 |      |
| <b>Sum</b> |      |             | <b>3265.33</b> |        |       |      |

# HPLC chart for 2a after the reaction

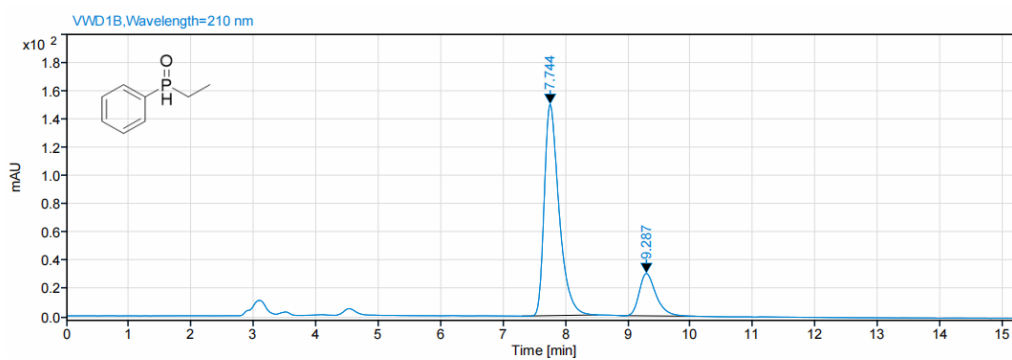

Signal: VWD1B,Wavelength=210 nm

| RT [min]   | Type | Width [min] | Area           | Height | Area% | Name |
|------------|------|-------------|----------------|--------|-------|------|
| 7.744      | MM m | 1.21        | 2450.14        | 149.18 | 81.41 |      |
| 9.287      | MM m | 1.21        | 559.64         | 29.87  | 18.59 |      |
| <b>Sum</b> |      |             | <b>3009.78</b> |        |       |      |
